# Supplementary material for: Establishing and augmenting views on the acceptability of a paediatric critical care randomised controlled trial (the FEVER trial): a mixed methods study
Source: PubMed Central journal article supplement (PMC7949453; doi:10.1136/bmjopen-2020-041952), 2021-03-10
Supplement: bmjopen-2020-041952.draft_revisions.pdf [file bmjopen-2020-041952.draft_revisions.pdf]

# BMJ Open

BMJ Open is committed to open peer review. As part of this commitment we make the peer review history of every article we publish publicly available.

When an article is published we post the peer reviewers' comments and the authors' responses online. We also post the versions of the paper that were used during peer review. These are the versions that the peer review comments apply to.

The versions of the paper that follow are the versions that were submitted during the peer review process. They are not the versions of record or the final published versions. They should not be cited or distributed as the published version of this manuscript.

BMJ Open is an open access journal and the full, final, typeset and author-corrected version of record of the manuscript is available on our site with no access controls, subscription charges or pay-per-view fees (<http://bmjopen.bmj.com>).

If you have any questions on BMJ Open's open peer review process please email [info.bmjopen@bmj.com](mailto:info.bmjopen@bmj.com)

# BMJ Open

## Establishing and augmenting acceptability of a paediatric critical care trial: a mixed methods study

|                               |                                                                                                                                                                                                                                                                                                                                                                                                                                                                                                                                                                                                                                                                                                                                                                                                                                                                                                                                                                                                                            |
|-------------------------------|----------------------------------------------------------------------------------------------------------------------------------------------------------------------------------------------------------------------------------------------------------------------------------------------------------------------------------------------------------------------------------------------------------------------------------------------------------------------------------------------------------------------------------------------------------------------------------------------------------------------------------------------------------------------------------------------------------------------------------------------------------------------------------------------------------------------------------------------------------------------------------------------------------------------------------------------------------------------------------------------------------------------------|
| Journal:                      | <i>BMJ Open</i>                                                                                                                                                                                                                                                                                                                                                                                                                                                                                                                                                                                                                                                                                                                                                                                                                                                                                                                                                                                                            |
| Manuscript ID                 | bmjopen-2020-041952                                                                                                                                                                                                                                                                                                                                                                                                                                                                                                                                                                                                                                                                                                                                                                                                                                                                                                                                                                                                        |
| Article Type:                 | Original research                                                                                                                                                                                                                                                                                                                                                                                                                                                                                                                                                                                                                                                                                                                                                                                                                                                                                                                                                                                                          |
| Date Submitted by the Author: | 21-Jun-2020                                                                                                                                                                                                                                                                                                                                                                                                                                                                                                                                                                                                                                                                                                                                                                                                                                                                                                                                                                                                                |
| Complete List of Authors:     | Deja, Elizabeth; University of Liverpool, Department of Public Health, Policy and Systems<br>Peters, Mark; Great Ormond Street Hospital For Children NHS Trust, Paediatric Intensive Care Unit; University College London, Institute of Child Health<br>Khan, Imran ; Queen Mary University of London, Institute of Population Health Sciences<br>Mouncey, Paul; ICNARC, Clinical Trials Unit<br>Agbeko, Rachel; Great North Children's Hospital, Paediatric Intensive Care Unit<br>Fenn, Blaise; Patient partner<br>Watkins, Jason; Patient partner<br>Ramnarayan , Padmanabhan; Great Ormond Street Hospital for Children, Children's Acute Transport Service,<br>Tibby, Shane; Evelina Childrens Hospital, Paediatric Intensive Care<br>Thorburn, Kentigern; Alder Hey Childr.ens Hospital, Paediatric Intensive Care<br>Tume, Lyvonne; University of Salford, School of Health and Society<br>Rowan, Kathryn; Intensive Care National Audit and Research Centre (ICNARC),<br>Woolfall, Kerry; University of Liverpool, |
| Keywords:                     | Paediatric intensive & critical care < INTENSIVE & CRITICAL CARE, PAEDIATRICS, PAIN MANAGEMENT, QUALITATIVE RESEARCH                                                                                                                                                                                                                                                                                                                                                                                                                                                                                                                                                                                                                                                                                                                                                                                                                                                                                                       |
|                               |                                                                                                                                                                                                                                                                                                                                                                                                                                                                                                                                                                                                                                                                                                                                                                                                                                                                                                                                                                                                                            |

SCHOLARONE™  
Manuscripts

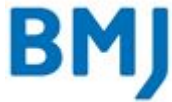

I, the Submitting Author has the right to grant and does grant on behalf of all authors of the Work (as defined in the below author licence), an exclusive licence and/or a non-exclusive licence for contributions from authors who are: i) UK Crown employees; ii) where BMJ has agreed a CC-BY licence shall apply, and/or iii) in accordance with the terms applicable for US Federal Government officers or employees acting as part of their official duties; on a worldwide, perpetual, irrevocable, royalty-free basis to BMJ Publishing Group Ltd ("BMJ") its licensees and where the relevant Journal is co-owned by BMJ to the co-owners of the Journal, to publish the Work in this journal and any other BMJ products and to exploit all rights, as set out in our [licence](#).

The Submitting Author accepts and understands that any supply made under these terms is made by BMJ to the Submitting Author unless you are acting as an employee on behalf of your employer or a postgraduate student of an affiliated institution which is paying any applicable article publishing charge ("APC") for Open Access articles. Where the Submitting Author wishes to make the Work available on an Open Access basis (and intends to pay the relevant APC), the terms of reuse of such Open Access shall be governed by a Creative Commons licence – details of these licences and which [Creative Commons](#) licence will apply to this Work are set out in our licence referred to above.

Other than as permitted in any relevant BMJ Author's Self Archiving Policies, I confirm this Work has not been accepted for publication elsewhere, is not being considered for publication elsewhere and does not duplicate material already published. I confirm all authors consent to publication of this Work and authorise the granting of this licence.

## Establishing and augmenting acceptability of a paediatric critical care trial: a mixed methods study

Elizabeth Deja<sup>1</sup> PhD, Mark J Peters PhD<sup>2</sup>, Imran Khan MSc<sup>3</sup> Paul R Mouncey MSc,<sup>3</sup> Rachel Agbeko FFICM,<sup>4</sup> Blaise Fenn,<sup>5</sup> Jason Watkins,<sup>5</sup> Padmanabhan Ramnarayan FFICM,<sup>6</sup> Shane M Tibby MB.ChB,<sup>7</sup> Kentigern Thorburn MMed MD,<sup>8</sup> Lyvonne N Tume PhD,<sup>9</sup> Kathryn M Rowan PhD<sup>3</sup> and, Kerry Woolfall PhD<sup>1</sup> on behalf of the Paediatric Intensive Care Society Study Group (PICS-SG)

### Affiliations:

1 Institute of Population Health Sciences, University of Liverpool, Liverpool, United Kingdom

2 Respiratory, Critical Care and Anaesthesia Unit, University College London, Great Ormond Street, Institute of Child Health, London, United Kingdom

3 Institute of Population Health Sciences, Queen Mary University of London, United Kingdom

4 Paediatric Intensive Care Unit, Great North Children's Hospital, The Newcastle upon Tyne Hospitals NHS Foundation Trust, Institute of Cellular Medicine, Newcastle University, Newcastle, United Kingdom

5 Patient partner

6 Children's Acute Transport Service, Great Ormond Street Hospital, London, UK

7 Guy's & St Thomas' NHS Foundation Trust, Evelina Children's Hospital

8 Paediatric Intensive Care Unit, Alder Hey Children's Hospital, Liverpool, UK

9 Faculty of Health and Applied Sciences, University of the West of England, Glenside Campus, Bristol, United Kingdom

### Address correspondence to:

Dr Elizabeth Deja. University of Liverpool, 1<sup>st</sup> Floor, Block B, Waterhouse Building, Liverpool, L69 3GL.  
Email: [E.Deja@liverpool.ac.uk](mailto:E.Deja@liverpool.ac.uk). Telephone: 0151 794 5613

**Word count:** 3500

## ABSTRACT

**Objective:** To explore how research with parents and staff established and augmented perspectives and the design of a randomised controlled trial investigating temperature thresholds in critically ill children with fever and infection (FEVER).

**Design:** Mixed methods feasibility study at three time points: 1) before, 2) during and 3) after a pilot trial.

**Setting:** English, Paediatric Intensive Care Unities (PICU).

**Participants:** 1) pre-pilot trial focus groups with pilot site staff (n=56) and interviews with parents (n=25) whose child had been admitted to PICU in the last three years with a Fever and suspected infection; 2) questionnaires with parents of randomised children following pilot trial recruitment (n=48 from 47 families) 3) post-pilot trial interviews with parents (n=19), focus groups (n=50) and a survey (n=48) with site staff. Analysis drew on Sekhon et al's (2017) theoretical framework of acceptability.

**Results:** There was initial support for the trial, yet some concerns regarding proposed temperature thresholds and not using paracetamol for pain or discomfort. Pre-trial findings informed protocol changes and training. Some concerns about pain or discomfort during weaning from ventilation remained. Staff trained by the FEVER team found the trial more acceptable than those trained by colleagues. Parents and staff found the trial acceptable.

**Conclusions:** Pre-trial findings and pilot trial experience influenced acceptability, providing insight into how challenges may be overcome. We present an adapted theoretical framework of acceptability to inform future trial feasibility studies.

## KEY WORDS

Acceptability, Clinical trial, feasibility, Paediatric intensive care, qualitative, sepsis.

## ARTICLE SUMMARY

### Strengths and limitations of this study

- The longitudinal design enabled collection of data from parents and staff with relevant experience before, during and after the pilot trial.
- The mixed methods approach including interviews, focus groups and questionnaires enabled breadth and depth of insight to help establish trial feasibility.
- Use of the Sekhon, Cartwright and Francis (2017) Theoretical Framework of Acceptability allowed trial acceptability to be evaluated as a multifaceted construct as opposed to a poorly defined binary (acceptable/not acceptable) approach.
- Data collected during the pilot trial stage were limited to parent perspectives, the majority of whom were mothers, although staff views were sought retrospectively.

## INTRODUCTION

Recruitment and retention in clinical trials is a significant challenge, which leads to underpowered trials and the continued use of healthcare interventions that are not informed by robust scientific evidence [1-3]. Paediatric clinical trials are particularly challenging to conduct due to ethical and practical considerations that are not applicable to trials in adult settings [4-7]. For example, the eligible population is smaller and consent is obtained by proxy through children's parents or legal guardians [4, 8, 9]. These considerations are compounded in critical care settings by the emotive and time sensitive situation in which they take place. Clinical trials must be acceptable to parents and health care practitioners to facilitate recruitment, adherence and consent [10, 11]. Sekhon, Cartwright and Francis (2017)[11] present a Theoretical Framework of Acceptability (TFA) (see Figure 1) to assist researchers in assessing the acceptability of healthcare interventions, including clinical trials. The TFA presents seven theoretical constructs for researchers to consider when assessing whether people delivering or receiving a healthcare intervention consider it to be appropriate. The constructs highlight considerations when establishing acceptability, such as how an individual feels about the healthcare intervention, the perceived burden of taking part and the extent to which the participant understands the healthcare intervention and how it works. To our knowledge, the TFA has not been used in the analysis of real world data.

[INSERT FIGURE 1: Sekhon, Cartwright and Francis (2017) Theoretical Framework of Acceptability]

There is a lack of robust evidence or guidance to inform the management of fever due to an infection in critically ill children. The FEVER feasibility study aimed to establish whether it is possible to conduct a clinical trial comparing a permissive approach to fever (treat at  $\geq 40^{\circ}\text{C}$ ) with a restrictive approach (treat at  $\geq 37.5^{\circ}\text{C}$ ). Perceived challenges to the successful conduct of a fever randomised control trial (RCT) included: a protocol that was likely to differ from usual clinical practice; potential parental and staff concerns about allowing a child's fever to rise without treatment; no time to seek informed consent [12, 13]; and the possibility that children may die before trial participation is discussed with parents.

The FEVER feasibility study involved pre-trial research with parents and staff, an observation of UK practice and a subsequent pilot RCT with embedded research exploring the perspectives of parents and staff involved in the pilot RCT. Pilot RCT and observation study findings are reported separately [14, 15]. This paper focuses on research conducted to explore parent and staff perspectives on trial acceptability through the lens of the TFA.

## METHODS

### Study design

Mixed methods research involving interviews, focus groups and questionnaires during the pre-trial and pilot RCT. We used previous research [16, 17] to develop topic guides and participant information sheets (PIS). Exploring parent and staff views on the acceptability of FEVER, including information materials, temperature thresholds and the use of research without prior consent (RWPC).

### Patent and public involvement

Two parents (CF and JW) and one young adult (BF) with experience of severe infection and admission to hospital were co-investigators and members of the SMG. They provided valuable input into the design and conduct of the study, including reviewing documents for parent interviews (e.g. draft pilot trial participant information sheets) and informing study recruitment approaches (i.e. identification of social media groups and charities). They were also involved in the review of study progress and findings.

### Pre pilot trial: prospective recruitment and conduct

#### *Parent interviews*

Parents of children that had been admitted to an intensive care unit with a fever and infection in the last three years were recruited via: a database from a previous relevant study [18]; a letter from study sites [15]; and advertising on relevant social media and at sites. All routes invited parents to register interest in participation by contacting the research team.

Psychologist ED (PhD, female research associate) responded to parents' requests to participate in sequential order and checked eligibility. A draft pilot RCT PIS was emailed to parents prior to interview, which took place with ED in person or via telephone based on parent preference, consent was obtained. Interviewing stopped when data saturation [19] and variation in sample was reached.

#### *Staff focus groups*

Co-investigators at the four pilot RCT sites [15] disseminated invitations to relevant staff. KW (PhD, female, social scientist, Senior Lecturer) or ED obtained written consent. Closed questions were administered using a voting system (Turning Technologies, Youngstown, OH, USA).

## **Pilot RCT: Concurrent and retrospective recruitment and conduct**

Interim analysis of prospective data informed subsequent topic guides and questionnaires.

### *Parent questionnaire and interviews*

As part of the pilot RCT consent discussions, site researchers asked parents if they would like to complete the FEVER consent questionnaire before hospital discharge (concurrent) and/or take part in a telephone interview approximately a month later (retrospective). ED contacted those who consented to interview in sequential order, stratifying by study arm (lower/higher temperature threshold).

### *Staff survey and focus groups*

At the end of the pilot RCT, ED repeated focus groups with staff. Those unable to attend a focus group were invited by email to complete an online questionnaire containing the same closed questions administered to focus group participants using the voting system.

## **Analysis**

Digital audio recordings were transcribed verbatim by a professional transcription company (Voicescript Ltd., Bristol, UK). Transcripts were anonymised and checked for accuracy.

ED and KW used a thematic analysis approach [20] to explore themes within the data related to views on trial design and acceptability. Analysis was interpretive and iterative [20, 21]. NVivo 10 software (QSR International Pty Ltd., Melbourne, Australia) was used to assist in the organisation and coding of qualitative data. Quantitative data from the parent and staff questionnaires were entered into SPSS Version 20.0 (IBM Corp., Armonk, NY, US) and analysed using chi-squared and descriptive statistics. Please see separate publication for further details [15]. ED and KW then synthesized data and used framework analysis [22] to map findings onto each component of the TFA by time point [11] (see tables 1-3).



Table 1: Prospective Acceptability of a FEVER Pilot Trial mapped to Sekhon et al’s acceptability framework (2017)

| Group & data collection method          | Affective attitude                                                                                                                                                                                                                                                                                         | Burden                                                                                                                                                                                                                   | Ethicality                                                                                                                                                                                                        | Intervention Coherence                                                                                                                                                                                                | Opportunity Costs                                                                                                                                                                                                                                                                                        | Perceived Effectiveness                                                                                                                                                                                                                                                                                                | Self-Efficacy                                                                                                                                                                                     |
|-----------------------------------------|------------------------------------------------------------------------------------------------------------------------------------------------------------------------------------------------------------------------------------------------------------------------------------------------------------|--------------------------------------------------------------------------------------------------------------------------------------------------------------------------------------------------------------------------|-------------------------------------------------------------------------------------------------------------------------------------------------------------------------------------------------------------------|-----------------------------------------------------------------------------------------------------------------------------------------------------------------------------------------------------------------------|----------------------------------------------------------------------------------------------------------------------------------------------------------------------------------------------------------------------------------------------------------------------------------------------------------|------------------------------------------------------------------------------------------------------------------------------------------------------------------------------------------------------------------------------------------------------------------------------------------------------------------------|---------------------------------------------------------------------------------------------------------------------------------------------------------------------------------------------------|
| <p><b>Parents</b></p> <p>Interviews</p> | <p>100% stated they would consent for their child to take part in a Fever RCT</p> <p>Would consent with a 40°C threshold, but 39.5-39.9°C more acceptable<br/> <i>“I think 39.5 [°C]. But again you guys know best I’m just saying ...that’s very hot.”</i><br/>           (P17, father, non-bereaved)</p> | <p>The intervention was not invasive</p> <p>Concerns about unnecessary discomfort /pain in higher threshold</p>                                                                                                          | <p>Belief it is important to help other children in the future.</p> <p>Use of RWPC is necessary <i>“I understand there’s not really another way you can do it”</i><br/>           (P01, mother, non-bereaved)</p> | <p>Logically ‘make sense’ (P02, mother, bereaved).<br/>           PIS “it’s simple for them to read. (P06, mother, bereaved)</p> <p>Many suggested changes to the PIS to assist understanding and decision making</p> | <p>Children would still be given all other kinds of care/ interventions</p> <p>Concerns about loss of non-antipyretics effects of paracetamol e.g. reducing risk of seizures/riggers, pain relief.</p>                                                                                                   | <p>When study rationale was explained parents understood how allowing a fever could have a positive impact:<br/> <i>“Fever is meant to be like part of a fighting off, healing process isn’t it?”</i><br/>           (P07, mother, non-bereaved)</p>                                                                   | <p>The intervention was something parents understood and said they could support</p> <p>Important to approach for RWPC when parents have the capacity to make an informed decision</p>            |
| <p><b>Staff</b></p> <p>Focus group</p>  | <p>82% indicated 39.5°C was an acceptable permissive temperature threshold.<br/>           18.2% suggested 40°C was acceptable. Only 20.4% suggested 37.5°C was acceptable as may lead to unnecessary intervention.</p>                                                                                    | <p>Watching a child be in pain or experience negative side effects: <i>“Incredibly difficult to wait and watch”</i><br/>           (P05, FG5). The trial would be more acceptable if limited to ventilated children.</p> | <p>Mixed views on RWPC, n=25/49, (51%) thought acceptable based on past experience and the emergency situation.</p> <p>Concerns about use of RWPC for an intervention that may not be supported by parents.</p>   | <p>Understanding that optimal temperature thresholds are unknown</p> <p>Want more clinical evidence as it goes against experiential knowledge (e.g. administering antipyretic at 38°C)</p>                            | <p>Concerns about the loss of non-antipyretic effects e.g. discomfort relief, reducing risk of seizures/riggers, decreased cardio work load.</p> <p>Staff with no experience of RWPC had concerns it would negatively impact on trust and the <i>“working relationship”</i><br/>           (P03,FG1)</p> | <p>Evidence to support the trial:<br/> <i>“Well there is, there is a bit of science which suggests we should let the temperature get higher”</i><br/>           (P01, FG3)</p> <p>Waiting for the permissive threshold would go against their clinical training or <i>“gut instinct”</i><br/>           (P05, FG2)</p> | <p>No perceived issues with taking a temperature. Query method that is going to be used.</p> <p>Nurses stated they may not follow the protocol if a child was upset, combative, in discomfort</p> |

Table 2: Parent concordant acceptability of a FEVER Pilot Trial mapped to Sekhon et al's acceptability framework (2017)

| Data collection method | Affective attitude                                               | Burden                           | Ethicality                                                                                                                                                                                                                                  | Intervention Coherence                                                                                                   | Opportunity Costs                                                                                                                                                                                                                                                                                                                                                      | Perceived Effectiveness                                                                                                                    | Self-Efficacy                                                                             |
|------------------------|------------------------------------------------------------------|----------------------------------|---------------------------------------------------------------------------------------------------------------------------------------------------------------------------------------------------------------------------------------------|--------------------------------------------------------------------------------------------------------------------------|------------------------------------------------------------------------------------------------------------------------------------------------------------------------------------------------------------------------------------------------------------------------------------------------------------------------------------------------------------------------|--------------------------------------------------------------------------------------------------------------------------------------------|-------------------------------------------------------------------------------------------|
| Parents Questionnaire  | N= 92/100 (92%) consented to taking part in the Fever Pilot RCT. | Not collected at this Time point | N= 32/41 (79%) reported the belief medical research studies are important<br><br>N= 42/48 (89.4%) satisfied with the RWPC process in the Fever pilot RCT<br><br>N= 32/41 (78%) selected helping other children as a reason for taking part. | N= 46/48, (96%) agreed that the information received about the Fever pilot RCT was clear & straightforward to understand | <i>My child is comfortable"</i> (P49, mother, permissive)<br><br>Concerns about their child being in pain or discomfort and impact on pre-existing medical condition.<br><i>"My son had too many underlying medical conditions and felt it may hinder his recovery as he was selected to the upper limit before treatment</i> (P73, questionnaire, father, permissive) | N= 30/41 (73.2%) selected helping my child as a reason for taking part.<br><br><i>"So far recovering well"</i><br>P21,mother,non-bereaved) | N= 41,(89.4%) felt they made the decision for their child to take part in the pilot trial |

Table 3: Respective Acceptability of a FEVER Pilot Trial mapped to Sekhon et al's acceptability framework (2017)

| Group & data collection method(s)     | Affective attitude                                                                                                                                                                                                                                                                                                                                                               | Burden                                                                                                                                                                                                                                                                                                                        | Ethicality                                                                                                                                                                                                                                                                                     | Intervention Coherence                                                                                                                                     | Opportunity Costs                                                                                                                                                             | Perceived Effectiveness                                                                                                                 | Self-Efficacy                                                                                                                                                                                                                                                                        |
|---------------------------------------|----------------------------------------------------------------------------------------------------------------------------------------------------------------------------------------------------------------------------------------------------------------------------------------------------------------------------------------------------------------------------------|-------------------------------------------------------------------------------------------------------------------------------------------------------------------------------------------------------------------------------------------------------------------------------------------------------------------------------|------------------------------------------------------------------------------------------------------------------------------------------------------------------------------------------------------------------------------------------------------------------------------------------------|------------------------------------------------------------------------------------------------------------------------------------------------------------|-------------------------------------------------------------------------------------------------------------------------------------------------------------------------------|-----------------------------------------------------------------------------------------------------------------------------------------|--------------------------------------------------------------------------------------------------------------------------------------------------------------------------------------------------------------------------------------------------------------------------------------|
| <b>Parents Interviews</b>             | <i>'I think it's a brilliant idea, so I'm all, I'm all for it'</i> (P80, interview mother, permissive). Decliners also approve the trial <i>"They seem to be quick let's give them paracetamol. we've always been like a kind of, a hold off [ . . . ] I think sometimes paracetamol can hide other things going on as well."</i> (P83, interview, mother, permissive, decliner) | Not invasive <i>"I mean if it was more of an invasive study, I might have had to query it a little bit more but I was happy with everything"</i> (Parent 53, interview, father, restrictive).<br><br>Not in discomfort while ventilated<br><br>When being weaned of ventilator some children displayed discomfort / distress. | Not causing harm to their child: <i>"I just thought, There's no harm in letting her into the study"</i> (P78, interview, mother, restrictive).<br><br>Wish to help others <i>"if it's gonna help other people then yeah"</i> (P85, interview, father, restrictive).<br><br>RWPC was acceptable | Involved treatment, which parents were familiar with; that logically made sense; that was <i>"Clearly explained"</i> (P74, interview, mother, permissive), | 37.5°C ,very acceptable as normal practice at home<br><br>39.5°C acceptable if child is not in discomfort<br><br>≥39.5 °C not acceptable if the child is in pain or distress. | Understand how a fever may logically help a child.<br><br>Concerns about negative impact due to child's pre-existing medical conditions | Valued ability to withdraw or decline consent. <i>"I was happy enough for him to undergo the trial but if at any point the nurses thought he could do with the Calpol, or I thought he could, then I wanted the trial to stop it could do."</i> (P49, interview, mother, permissive) |
| <b>Staff Focus group &amp; Survey</b> | 85 % (n=81/95) trial acceptable<br><br>95% (n=95/100, four missing) 37. °C acceptable<br><br>53% (n=42/79) 39.5°C acceptable                                                                                                                                                                                                                                                     | If the child is not conscious or not in pain no burden                                                                                                                                                                                                                                                                        | Parents think the trial is acceptable therefore it is ethical to randomise their children.<br><br>89.4 % (n= 42/48) satisfied with the use of RWPC                                                                                                                                             | If trained by trial team. Then 39.5°C acceptable                                                                                                           | Mixed views, some observed no negative side effects and reported no costs.                                                                                                    | Seeing as believing, <i>"It's a really good, valuable study to see on a larger scale"</i> (P04, FG5).                                   | Valued being involved in trial design. Ability to follow the protocol mixed, n= 52/96 (54%) <i>"technically very easy to follow"</i> (P06, FG1)                                                                                                                                      |

## RESULTS

### Participant characteristics

*Prospective (Pre-pilot RCT):* 25 semi-structured interviews (n=20 mothers, n=5 fathers) with bereaved (n=6) and non-bereaved (n=19) parents (see figure 2). Parents were interviewed a median of 14 months (range 6-38 months) after admission. Interviews took a median of 48 minutes (range 15-105 minutes). The 15-minute interview was concluded part way through by a bereaved father. Fifty-six staff took part in six focus groups across the four sites, lasting a median of 50 minutes (range 31-59 minutes). Staff mainly self-identified as nurses (n=45, 81%), all were involved in the clinical care of children.

[INSERT FIGURE 2: Participant characteristics by time point]

*Concurrent (During-pilot RCT):* Eighty parents of the 100 children randomised to the pilot RCT consented to receive questionnaire, of these, 48 from 47 families completed and returned a questionnaire while their child was admitted to hospital. Of these, 41/48 (85%) provided consent and 6/48 (13%) declined consent (n=1 missing).

*Retrospective (Post-pilot RCT):* Sixty-six parents of the 100 children randomised to the FEVER pilot trial consented to be contacted for an interview. Data saturation [19] was reached after eight interviews with parents of children allocated to the restrictive (lower) temperature threshold and after 11 interviews with parents of children allocated to the permissive (higher) temperature threshold. Parents were interviewed a median of 31 days after randomisation (range 9-70 days). Their children had received treatment for respiratory illness (e.g. bronchiolitis and respiratory syncytial virus) (n=18/19, 94%), cancer (n=1/19, 5%) and septic shock (n=1/19, 5%). Interviews took an average 32 minutes (range 20-50 minutes).

The staff sample included 98 site staff across all four pilot RCT sites. Almost half (48/98, 49 %) completed the questionnaire, with the rest attending a focus group. The majority (n=75, 77%) were nurses, n=45 (60%) were senior-level staff and most (n=79/98, 81%) were involved in the clinical care of children. Focus groups took an average of 53 minutes (range 23-106 minutes).

### Pre-trial, prospective acceptability

All parents interviewed described how they would hypothetically consent for the use of their child's information in the proposed trial. Parents' views on trial acceptability appeared to be influenced by factors including: all other treatments for infection are given (*Opportunity costs*); the non-invasive nature of the intervention (*Burden*); support for RWPC in this context (*Ethicality*); trust in medical

1  
2  
3 staff to act in the best interests of their child; and a belief that the trial question made sense and  
4 therefore likely to achieve its purpose (*Perceived effectiveness*):

5  
6  
7 “cause fever is meant to be like part of a fighting off, healing process isn’t it? A natural one...  
8  
9 I can understand exactly why it would be interesting to see what happens.” (P07, mother,  
10 non-bereaved)  
11

12 Although analysis of pre-RCT data indicated that many of the constructs of acceptability were met  
13 (see Table 1), there were also aspects of burden, opportunity costs, ethicality and intervention  
14 coherence identified as problematic by both parents and staff. As shown in Table 1, staff concerns  
15 outweighed support at this stage.  
16  
17

18  
19 The majority of parents were not worried about the proposed restrictive temperature threshold of  
20 37.5°C. However, staff expressed concerns that this was too low a threshold to administer an  
21 antipyretic (n=43/54, 80%, two missing) and would go against perceived “*normal practice*” (P01,  
22 FG4). A common concern was that children would be given unnecessary treatments in a clinical  
23 context where “*we try and give the minimum amount of drugs*” (P02, FG5) (*Affective attitude*).  
24  
25

26  
27 In contrast, many parents voiced concerns about the acceptability of the permissive threshold with  
28 regards to increased risk of “*seizures*” (P03, mother, non-bereaved) and other potential detrimental  
29 side effects (opportunity costs), such as “*organs shutting down*” (P07, mother, non-bereaved),  
30 “*rigger*” (P06, mother, bereaved) or unnecessary discomfort (*Burden*). The majority suggested that  
31 the pilot RCT would be more acceptable if the permissive temperature threshold was slightly lower  
32 (e.g. 39.9°C or 39.5°C). Although parents stated that they would still consent to a trial involving a  
33 threshold of 40°C (*Affective attitude*), as they trusted staff to monitor their child and act in their best  
34 interests:  
35  
36

37  
38  
39 “I would trust that my child was being monitored, it’s not like they’re waiting for her  
40 condition to get worse before they do something, you are having, a nurse by your bedside at  
41 all times, I had complete trust.” (P25, mother, non-bereaved)  
42

43  
44 Staff also described how a permissive threshold of  $\geq 40^{\circ}\text{C}$  was too high and how they would be  
45 concerned about not using paracetamol for analgesia in the less unwell, spontaneously breathing  
46 patients, who may be in pain or discomfort (*Burden*). In addition, staff were concerned about  
47 parental acceptability of the permissive threshold, RWPC (*Ethicality, Opportunity costs*) and the  
48 impact of increased cardiac workload (*Opportunity costs*).  
49  
50

51  
52 Both groups understood the aims of the proposed trial. However, in addition to changes to  
53 temperature thresholds, amendments to the protocol were suggested. Parents identified aspects of  
54  
55  
56  
57  
58  
59  
60

1  
2  
3 the PIS that required clarification, including whether not treating a temperature could cause a  
4 seizure, incorporating an explanation of how all other treatments would still be given. Staff  
5 requested additional information about the scientific evidence underpinning the research question,  
6 as well as clarification on key issues, such as what cooling methods could be used.  
7  
8  
9

### 10 **Response to pre-trial findings**

11  
12 Pre-trial findings were used in conjunction with observation study findings [15] to develop the pilot  
13 RCT protocol and site training. These included: a permissive temperature threshold of  $\geq 39.5^{\circ}\text{C}$ ;  
14 inclusion criteria that required patients to be mechanically ventilated, therefore likely to be on other  
15 analgesia and changes to information materials. For example, staff training and PIS incorporated  
16 evidence to demonstrate how fever does not cause seizures and observation study findings that  
17 showed the restrictive temperature threshold ( $\geq 37.5^{\circ}\text{C}$ ) falls within usual practice. To address staff  
18 concerns about how parents may respond to trial and RWPC discussions, parent perspectives were  
19 communicated in site training, highlighting parental acceptability of RWPC, temperature thresholds,  
20 parents' questions about the study, and suggestions on how to address such questions.  
21  
22  
23  
24  
25  
26  
27  
28

### 29 **Concurrent acceptability**

30  
31 As demonstrated in Table 2, parent questionnaire data showed that the six constructs of  
32 acceptability measured during this time point were met. Parents reported that the study information  
33 '*was clear and straightforward to understand*' (*Intervention coherence*). Ninety two percent of  
34 randomised children received consent for their continued participation in the pilot RCT (Affective  
35 attitude) [15]. Main reasons for providing consent related to the belief that participation might help  
36 their child ( $n=30/41$ , 73%, *Perceived effectiveness*) and help other children in the future ( $n=32/41$ ,  
37 78%, *Ethicality*). Parents also found the study acceptable because "*my child was comfortable*" (P49,  
38 questionnaire, mother, permissive) (*Opportunity costs and Burden*).  
39  
40  
41  
42  
43  
44

45 Of the eight that refused consent to continue, seven (88%) had been allocated to the permissive  
46 (higher) treatment group. Data suggested that parents who declined some element of their child  
47 participation still supported the proposed Fever RCT. Reasons for refusal of consent were linked to  
48 pre-existing medical conditions and the wish to limit any discomfort experienced by their child: "*My*  
49 *son had too many underlying medical conditions and felt it may hinder his recovery as he was*  
50 *selected to the upper limit*" (P73, questionnaire, father, permissive). Suggesting that there were still  
51 some concerns about withholding analgesia (*Opportunity costs*).  
52  
53  
54  
55  
56

57 Staff acceptability was not measured at this point.  
58  
59  
60

### Post-trial, retrospective acceptability

Interviews conducted with parents a median one-month post randomisation supported and provided further insights into questionnaire findings. All seven constructs of acceptability were met (see table 3). Parents were interested in the trial question and felt the proposed trial was important (*Affective attitude, Perceived effectiveness*). Parents described staff as approaching them appropriately, with well-timed, clear, comprehensive study information leading to strong intervention coherence:

*"I understood what they were saying and was happy to sort of go ahead, with the trial. If it wasn't explained to me too well, I probably wouldn't have bothered doing it."* (P77, interview, father, restrictive) (*Intervention coherence*)

Parents of children allocated to the restrictive temperature threshold found the trial very acceptable as giving paracetamol at this temperature was *"something that I would do myself anyway"* (P82, interview, father, restrictive) (*Ethicality*). Parents also viewed the permissive threshold to be acceptable. However, this acceptability was conditional on their child not being in discomfort (*Opportunity costs*):

*"The only thing would be if she wasn't on any other kind of pain relief, but there's other things to manage, her discomfort"*. (P73, interview, father, permissive)

Indeed, two mothers described how they found the trial acceptable and gave full consent, but later chose to withdraw their child from the study when they were being weaned from ventilation and sedation due to concerns about their child being in pain or distress. Parents valued the ability to withdraw or decline consent (*Self-efficacy*). They also described how they trusted staff to act in their child's best interests, including not adhering to the protocol by administering an antipyretic if at any point staff felt that it was needed (*Burden and Opportunity costs*):

*"I know if anything did happen, you's can stop at any time. Stop it if they saw it was getting out of hand and he, and I felt like it, it wasn't helping, that I would stop it....they wouldn't let him go to the stage of him getting poorly"*. (P85, interview, father, restrictive)

Unlike parents' views, which largely remained consistent across study time points, staff perceptions of the acceptability of the lower temperature shifted during the course of the pilot RCT. Witnessing patient's positive reactions to RWPC and trial discussions and an awareness that  $\geq 37.5^{\circ}\text{C}$  was usual practice, resulted in 95% (n=95/100, four missing) of staff rating the restrictive threshold as acceptable or very acceptable: *"Everybody that was in the lower end of it, I found were like happy to take part"* (P01, FG4).



1  
2  
3 Staff had mixed views about the acceptability of the permissive temperature threshold.  
4  
5 Approximately half (n=42/79, 53%) indicated that the  $\geq 39.5^{\circ}\text{C}$  threshold was acceptable. They valued  
6  
7 how the trial team responded to their pre-trial concerns by changing the inclusion criteria to omit  
8  
9 non-ventilated children (*Self-efficacy*). Some stated that their previous concerns about high  
10  
11 temperatures causing harm or discomfort (*Opportunity costs*) and parents having a negative  
12  
13 response to the trial and RWPC (*Ethicality*) were not observed:

14  
15 *"Some patients are randomised into the higher temperature and people see that they're*  
16  
17 *actually manageable and it doesn't cause them any harm... It's kind of seeing is believing."*  
18  
19 (P03, FG1)

20  
21 Staff who did not find the permissive temperature acceptable were concerned about not giving  
22  
23 paracetamol for pain or discomfort when a child was conscious (*Opportunity costs*). These concerns  
24  
25 meant that some staff administered paracetamol before a child's temperature had reached  $\geq 39.5^{\circ}\text{C}$ :  
26  
27 *"I feel like potentially we're making our patients more uncomfortable."* (P01, FG2)

28  
29 Interestingly, staff trained by their local unit colleagues were significantly more likely to find the  
30  
31 permissive threshold not acceptable when compared to those trained directly by the pilot trial team  
32  
33 ( $\chi^2(2) = 8.78, p = 0.012$ ). Staff trained colleagues also rated site training as being poor (n=11/97,  
34  
35 11%). These staff remained unclear about the scientific rationale for the study and had lower  
36  
37 Intervention coherence.

38  
39 Despite issues with aspects of *Intervention coherence* and *Opportunity costs*, overall staff rated the  
40  
41 fever trial acceptable (n=81/95, 85 %, *Affective attitude*) and practicable to conduct (n=80/95, 84%,  
42  
43 *Self-efficacy*). Findings suggest that their views could be further augmented if the proposed Fever  
44  
45 RCT protocol was revised to also exclude patients receiving non-invasive forms of ventilation (e.g.  
46  
47 high-flow nasal oxygen) or those close to being extubated when sedation is being weaned.

## 48 49 **Trust**

50  
51 During data analysis, we found that the concept of trust between parents and staff was prevalent  
52  
53 within our data and intransigently linked to trial acceptability. For example, parents found the trial  
54  
55 acceptable because they trusted staff to put the needs of their child before the requirements of the  
56  
57 study. Both groups discussed the trust parents place in medical expertise during a very emotive  
58  
59 situation. Staff also highlighted that maintaining parental trust impacts on their decisions *"I feel like*  
60  
*there's an element of trust there that would be broken from my point of view."* (P01, FG2,



1  
2  
3 retrospective). The construct of 'Trust' is not reflected within the TFA. We present an adapted TFA in  
4 Figure 3 incorporating Trust.  
5

6  
7 [INSERT FIGURE 3: The adapted Theoretical framework of Acceptability)  
8

## 9 10 **DISCUSSION**

11  
12 Our study highlights the value of conducting pre-trial research with all key stakeholders to inform  
13 the design of challenging clinical trials [23]. Research with parents and staff, helped establish trial  
14 acceptability, as well as influence and changed perspectives over time. Prospective qualitative  
15 research identified mixed staff views, whilst parents found the trial broadly acceptable. Both the  
16 parental and staff support for RWPC in time critical trials is constant with previous research [18, 24-  
17 28]. Aspects of *Intervention Coherence, Opportunity Costs, Ethicality and Burden* [11] were identified  
18 that threatened trial success. The majority of staff concerns related to not using paracetamol or  
19 active cooling for pain relief, or to prevent febrile seizures [14]. Prospective findings informed  
20 changes to the PIS, staff training package and the addition of mechanical ventilation to inclusion  
21 criteria. Data from the concurrent and retrospective time points showed a positive response to such  
22 changes, particularly amongst staff. Suggestions to further augment views on trial acceptability and  
23 reduce the number of potential protocol deviations and withdrawals were identified. These include  
24 changes to trial inclusion criteria as well as staff training content and delivery [14].  
25  
26

27  
28 Our findings demonstrate Sekhon and Francis' (2017) assertion that the acceptability of healthcare  
29 interventions is not a fixed construct. If we had taken a binary (acceptable/ not acceptable) or  
30 snapshot approach to determining acceptability, then we would not have been able to identify and  
31 address key concerns that threatened trial acceptability and ultimately, trial feasibility. The TFA was  
32 demonstrated to be comprehensive and relevant to our work. However, we found that the concept  
33 of trust between parents and staff was closely linked to trial acceptability and is not reflected in the  
34 framework. The importance of trust is a recurring theme in healthcare and medicine but is  
35 particularly salient in paediatric trials, as the more vulnerable the population, the greater the need  
36 for trust [5, 29]. Drawing on Hall et al's (2001) [29] work into defining trust in medical relationships,  
37 we propose the addition of an eighth construct of 'Trust' to help inform future trial feasibility  
38 research (see Figure 3). Further research is needed to test the adapted model in establishing the  
39 feasibility of other healthcare interventions and settings. This work will help to establish the  
40 appropriateness of trust as additional construct in the TFA.  
41  
42  
43  
44  
45  
46  
47  
48  
49  
50  
51  
52  
53  
54  
55

56  
57 As the pilot trial was conducted in three months, during the busy winter period the concurrent work  
58 only included parents and therefore lacks insight into staff perspectives during pilot trial conduct.  
59  
60

1  
2  
3 This limitation was compensated for by the use of retrospective (1 week-1 month) mixed methods  
4 ensuring a larger sample, through the survey and depth of insights, through focus groups.  
5  
6

7 In summary challenges to delivering the proposed trial included staff and parent concerns about the  
8 acceptability of the proposed protocol. Pre-trial research, staff training and experience of pilot trial  
9 conduct augmented views, providing insight into how challenges may be overcome, such as changes  
10 to the inclusion criteria and delivery of site training. We present an adapted TFA to inform the design  
11 of future trial feasibility studies.  
12  
13  
14

### 15 16 **Acknowledgements**

17  
18 The authors would like to thank all the parents who shared their experiences with us; their  
19 contribution to the research is invaluable. The authors are grateful to all the staff at participating UK  
20 hospitals and charities/ support groups for their help with recruitment and the UK PICS Study Group  
21 (PICS-SG) for their contributions to this study. We would also like to thank Ms Clara Francis (CF) as  
22 co-investigator and patient partner.  
23  
24  
25  
26

### 27 28 **Funding**

29  
30 This study was funded by the UK National Institute for Health Research Health Technology  
31 Assessment programme (15/44/01) and supported by the National Institute for Health Research  
32 Great Ormond Street Hospital Biomedical Research Centre. The trial sponsor was Great Ormond  
33 Street Hospital NHS Foundation Trust, Joint R&D Office GOSH/ICH, 30 Guilford Street, London WC1N  
34 1EH, United Kingdom (email: Research.Governance@gosh.nhs.uk). The Clinical Trials Unit for the  
35 Fever study was the ICNARC CTU. The views expressed in this publication are those of the authors  
36 and not necessarily of the funder, the sponsor, the NHS, the NIHR, or the UK Department of Health.  
37  
38  
39  
40  
41

### 42 43 **Ethics approval and consent to participate**

44  
45 Ethical approval for the study was provided by the National Research Ethics Committee (NRES)  
46 (17/LO/1139). Management approvals were obtained from all study sites.  
47  
48

### 49 50 **Data statement**

51  
52 The datasets generated during and/or analysed during the current study are not publicly available as  
53 consent was not sought for data sharing.  
54

### 55 56 **Competing interests' statement.**

57  
58 MJP is a member of the NIHR HTA Board. KMR is a member of the NIHR HS & DR Board.  
59  
60

### Author contributions

Dr Elizabeth Deja conducted the qualitative research, co-analysed the data, drafted the initial manuscript, reviewed and revised the manuscript.

Professor Mark J Peters is the chief investigator of the FEVER study, he conceived, designed and oversaw conduct of the FEVER study and critically reviewed the manuscript.

Mr Imran Khan was the study manager at the ICNARC CTU responsible for day to day FEVER study management and critically reviewed the manuscript.

Mr Paul R Mouncey is the head of research at ICNARC CTU, a co-applicant, involved in the design and coordination of the FEVER study, contributed to and reviewed the manuscript.

Mr Blaise Fenn and Mr Jason Watkins were study co-applicants, patient and parent representatives who contributed to the design and conduct of the FEVER study including mixed methods perspectives elements.

Dr Padmanabhan Ramnarayan co-applicant helped design and conduct the FEVER study.

Dr Rachel Agbeko, Dr Shane M Tibby, Professor Lyvonne N Tume were co-applicants, site principal investigators and critically reviewed the manuscript.

Dr Kentigern Thorburn site principal investigator and critically reviewed the manuscript.

Dr Kathryn M Rowan is the director at ICNARC CTU, study co-applicant involved in designing and overseeing the FEVER study.

Dr Kerry Woolfall was a co-applicant on the FEVER study, designed the mixed methods perspectives elements of the study, supervised the qualitative research, co-analysed the data and reviewed and revised the manuscript.

### Licence statement

I, the Submitting Author has the right to grant and does grant on behalf of all authors of the Work (as defined in the below author licence), an exclusive licence and/or a non-exclusive licence for contributions from authors who are: i) UK Crown employees; ii) where BMJ has agreed a CC-BY licence shall apply, and/or iii) in accordance with the terms applicable for US Federal Government officers or employees acting as part of their official duties; on a worldwide, perpetual, irrevocable, royalty-free basis to BMJ Publishing Group Ltd ("BMJ") its licensees and where the relevant Journal is co-owned by BMJ to the co-owners of the Journal, to publish the Work in BMJ Open and any other BMJ products and to exploit all rights, as set out in our licence.

### REFERENCES

1. McDonald AM, Knight RC, Campbell MK, et al. What influences recruitment to randomised controlled trials? A review of trials funded by two UK funding agencies. . *Trials*. 2006;7.
2. Bower P, Brueton V, Gamble C, et al. Interventions to improve recruitment and retention in clinical trials: a survey and workshop to assess current practice and future priorities. *Trials*. 2014;15(399).
3. Treweek S, Mitchell E, Pitkethly M, et al. Strategies to improve recruitment to randomised controlled trials. *Cochrane Database Syst Re*. 2010.
4. Caldwell P, Murphy S, Butow P, Craig J. Clinical trials in children *The Lancet*. 2004;364(9436):803-11.

- 1
  - 2
  - 3
  - 4
  - 5
  - 6
  - 7
  - 8
  - 9
  - 10
  - 11
  - 12
  - 13
  - 14
  - 15
  - 16
  - 17
  - 18
  - 19
  - 20
  - 21
  - 22
  - 23
  - 24
  - 25
  - 26
  - 27
  - 28
  - 29
  - 30
  - 31
  - 32
  - 33
  - 34
  - 35
  - 36
  - 37
  - 38
  - 39
  - 40
  - 41
  - 42
  - 43
  - 44
  - 45
  - 46
  - 47
  - 48
  - 49
  - 50
  - 51
  - 52
  - 53
  - 54
  - 55
  - 56
  - 57
  - 58
  - 59
  - 60
5. Greenberg RG, Gamel B, Bloom D, et al. Parents' perceived obstacles to pediatric clinical trial participation: Findings from the clinical trials transformation initiative *Contemporary Clinical Trials Communications*. 2018.
6. Sammons HM, Starkey ES. Ethical issues of clinical trials in children. *Paediatrics and child health* 2011;22(2).
7. Field MJ, Behrman RE. Institute of Medicine (U.S.). Committee on Clinical Research Involving Children., *Ethical Conduct of Clinical Research Involving Children*. Washington, D.C.: National Academies Press; 2004.
8. Caldwell PHY, Butow PN, Craig JC. Pediatricians' attitudes towards randomized controlled trials involving children. *The Journal of Pediatrics* 2002;141(6).
9. Caldwell P, Butow P, Craig J. Parents' attitudes to randomised controlled trials involving children. *Journal of Pediatrics* 2003;145:555–60.
10. Diepeveen S, Ling T, Suhrcke M, Roland M, Marteau TM. Public acceptability of government intervention to change health-related behaviours: a systematic review and narrative synthesis. *BMC Public health* 2013;13(756).
11. Sekhon M, Cartwright M, Francis JJ. Acceptability of healthcare interventions: an overview of reviews and development of a theoretical framework. *BMC Health Services Research*. 2017;17(88).
12. Proposal for a Regulation of the European Parliament and of the Council on Clinical trials on medicinal products for human use, and repealing Directive 2001/20/EC., (2013).
13. The Medicines for human use (Clinical trials) and Blood Safety and Quality (Amendment) Regulations., (2008).
14. Peters MJ, Woolfall K, Khan I, et al. Permissive versus restrictive temperature thresholds in critically ill children with fever and infection: a multicentre randomized clinical pilot trial. *Critical Care*. 2019;23(1):69.
15. Peters MJ, Woolfall K, Khan I, et al. Different temperature thresholds for antipyretic intervention in critically ill children with fever due to infection: the FEVER feasibility RCT. *Health Technology Assessment* 2019;23(5):1 - 148.
16. Woolfall K, Frith L, Gamble C, et al. How parents and practitioners experience research without prior consent (deferred consent) for emergency research involving children with life threatening conditions: a mixed method study. *BMJ Open*. 2015;5.
17. Inwald DP, Canter R, Woolfall K, et al. Restricted fluid bolus volume in early septic shock: results of the Fluids in Shock pilot trial. *Arch Dis Child*. 2018.
18. Inwald D, Canter R, Woolfall K, et al. Restricted fluid bolus versus current practice in children with septic shock: the FiSh feasibility study and pilot RCT. *Health Technol Assess*. 2018;22(51).
19. Saunder B, Sim J, Kingstone T, et al. Saturation in qualitative research: exploring its conceptualization and operationalization. *Qual Quant*. 2018;52(4).
20. Braun V, Clarke V. Using thematic analysis in psychology. *Qualitative research in psychology*. 2006;3(2):77-101.
21. Braun V, Clarke V. what can "thematic analysis" offer health and wellbeing researchers? *International journal of qualitative studies on health and well-being*. 2014;9.
22. Gale NK, Heath G, Cameron E, Rashid S, Redwood S. Using the framework method for the analysis of qualitative data in multi-disciplinary health research. *BMC Medical Research Methodology*. 2013;13(117).
23. O'Cathain A, Thomas KJ, Drabble SJ, Rudolph A, Goode J, Hewison J. Maximising the value of combining qualitative research and randomised controlled trials in health research: the QUALitative Research in Trials (QUART) study--a mixed methods study. *Health Technol Assess*. 2014;18(38):1-197, v-vi.
24. Canvin K, Jacoby A. Duty, desire or indifference? A qualitative study of patient decisions about recruitment to an epilepsy treatment trial. *Trials*. 2006;7(32).
25. Roper L, Sherratt FC, Young B, et al. Children's views on research without prior consent in emergency situations: a UK qualitative study. *BMJ open* 2018;8.

- 1  
2  
3 26. Waterfield T, Lyttle MD, Shields M, et al. Parents' and clinicians' views on conducting  
4 paediatric diagnostic test accuracy studies without prior informed consent: qualitative insight from  
5 the Petechniae in Children study (PiC). Archives of Disease in Childhood. 2019:archdischild-2019-  
6 317117.  
7  
8 27. Woolfall K, Frith L, Dawson A, Gamble C, Lyttle MD, Young B. Fifteen-minute consultation: an  
9 evidence-based approach to research without prior consent (deferred consent) in neonatal and  
10 paediatric critical care trials. Archives of disease in childhood - Education & practice edition.  
11 2016;101(1):49-53.  
12 28. Brierley J, Larcher V. Emergency research in children: options for ethical recruitment. Journal  
13 of Medical Ethics. 2011;37(7):429-32.  
14  
15 29. Hall MA, Dugan E, Zheng B, Mishra AK. Trust in Physicians and Medical Institutions:What Is  
16 It, Can It Be Measured,and Does It Matter? The Milbank Quarterly. 2001;79(4).  
17  
18  
19  
20  
21  
22  
23  
24  
25  
26  
27  
28  
29  
30  
31  
32  
33  
34  
35  
36  
37  
38  
39  
40  
41  
42  
43  
44  
45  
46  
47  
48  
49  
50  
51  
52  
53  
54  
55  
56  
57  
58  
59  
60

For peer review only

**LEDGENDS**

Figure 1: Sekhon, Cartwright and Francis (2017) Theoretical Framework of Acceptability

Figure 2: Participant characteristics by time point

Table 1: Prospective Acceptability of a FEVER Pilot Trial mapped to Sekhon et al's  
acceptability framework (2017)

Table 2: Patient concordant acceptability of a FEVER Pilot Trial mapped to Sekhon et al's  
acceptability framework (2017)

Table 3: Respective Acceptability of a FEVER Pilot Trial mapped to Sekhon et al's  
acceptability framework (2017)

Figure 3: The adapted Theoretical framework of Acceptability

Figure 1, Theoretical Framework of Acceptability (Sekhon et al., 2017)

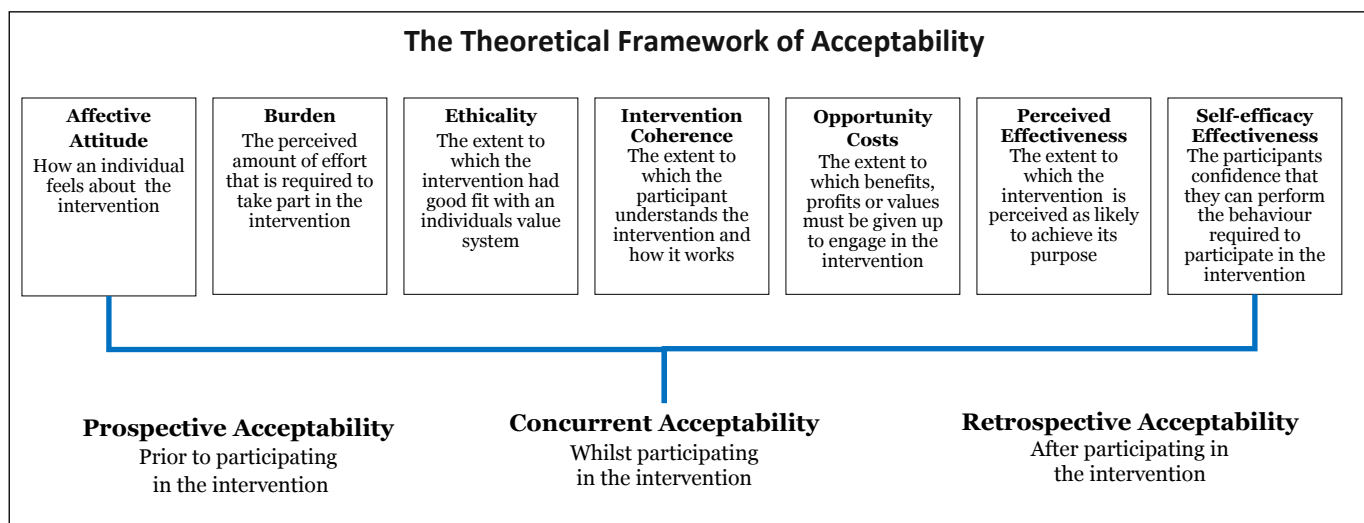

Peer review only

Figure 2, Participant characteristics by time point

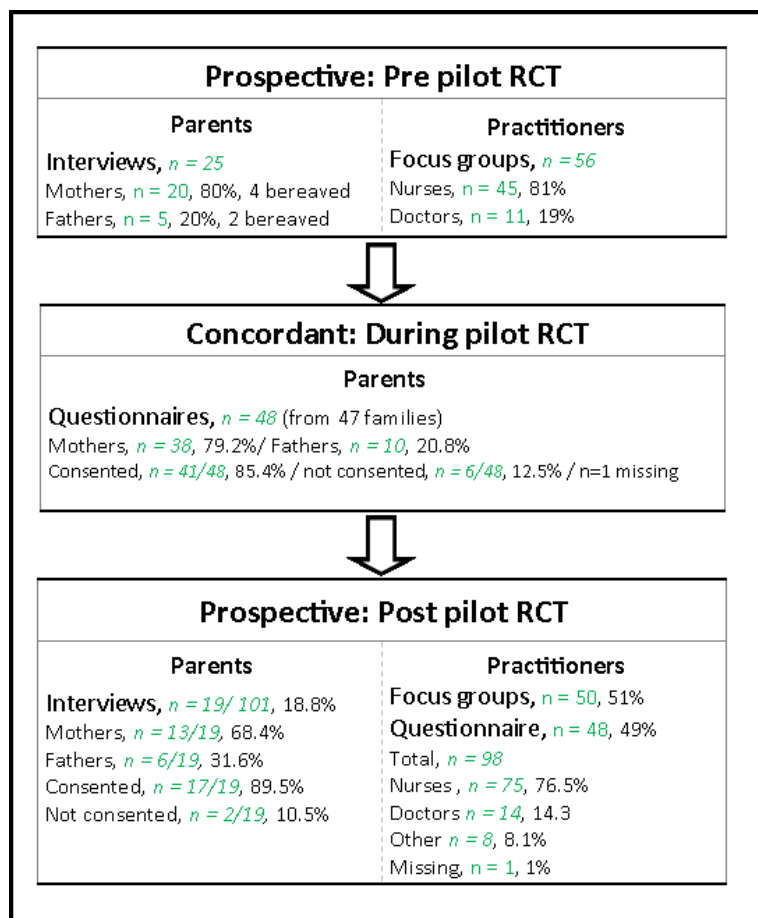



1  
2  
3  
4  
5  
6  
7  
8  
9  
10  
11  
12  
13  
14  
15  
16  
17  
18  
19  
20  
21  
22  
23  
24  
25  
26  
27  
28  
29  
30  
31  
32  
33  
34  
35  
36  
37  
38  
39  
40  
41  
42  
43  
44  
45  
46

Figure 3, the Adapted Theoretical Framework of Acceptability

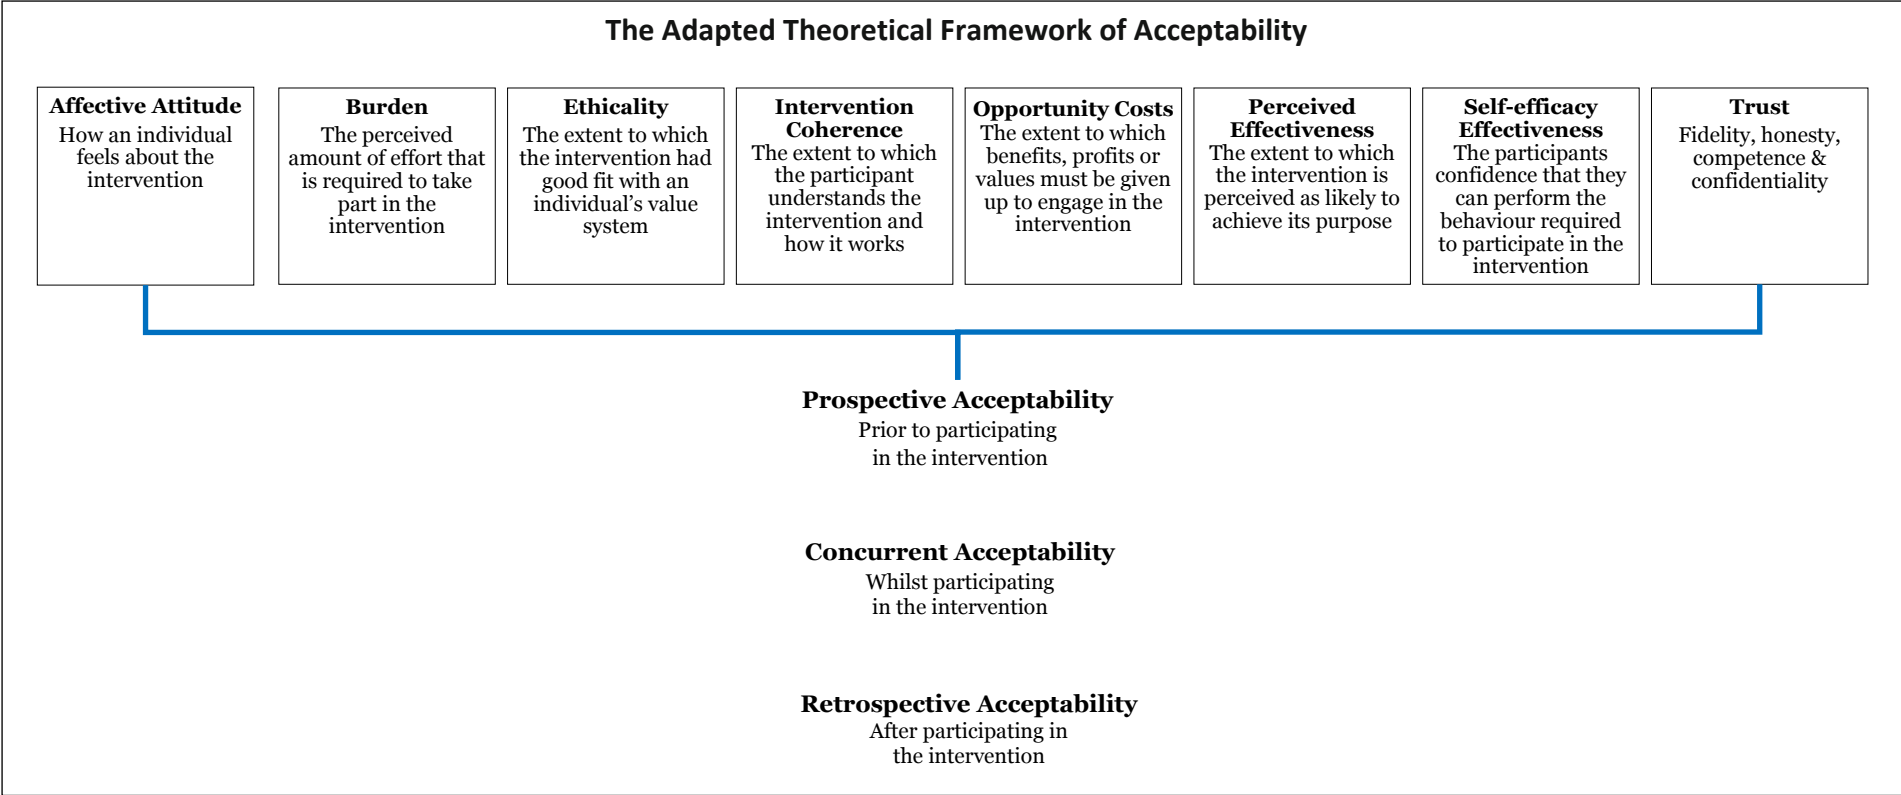

## COREQ (COnsolidated criteria for REporting Qualitative research) Checklist

A checklist of items that should be included in reports of qualitative research. You must report the page number in your manuscript where you consider each of the items listed in this checklist. If you have not included this information, either revise your manuscript accordingly before submitting or note N/A.

| Topic                                          | Item No. | Guide Questions/Description                                                                                                                              | Reported on Page No. |
|------------------------------------------------|----------|----------------------------------------------------------------------------------------------------------------------------------------------------------|----------------------|
| <b>Domain 1: Research team and reflexivity</b> |          |                                                                                                                                                          |                      |
| <i>Personal characteristics</i>                |          |                                                                                                                                                          |                      |
| Interviewer/facilitator                        | 1        | Which author/s conducted the interview or focus group?                                                                                                   |                      |
| Credentials                                    | 2        | What were the researcher's credentials? E.g. PhD, MD                                                                                                     |                      |
| Occupation                                     | 3        | What was their occupation at the time of the study?                                                                                                      |                      |
| Gender                                         | 4        | Was the researcher male or female?                                                                                                                       |                      |
| Experience and training                        | 5        | What experience or training did the researcher have?                                                                                                     |                      |
| <i>Relationship with participants</i>          |          |                                                                                                                                                          |                      |
| Relationship established                       | 6        | Was a relationship established prior to study commencement?                                                                                              |                      |
| Participant knowledge of the interviewer       | 7        | What did the participants know about the researcher? e.g. personal goals, reasons for doing the research                                                 |                      |
| Interviewer characteristics                    | 8        | What characteristics were reported about the interviewer/facilitator? e.g. Bias, assumptions, reasons and interests in the research topic                |                      |
| <b>Domain 2: Study design</b>                  |          |                                                                                                                                                          |                      |
| <i>Theoretical framework</i>                   |          |                                                                                                                                                          |                      |
| Methodological orientation and Theory          | 9        | What methodological orientation was stated to underpin the study? e.g. grounded theory, discourse analysis, ethnography, phenomenology, content analysis |                      |
| <i>Participant selection</i>                   |          |                                                                                                                                                          |                      |
| Sampling                                       | 10       | How were participants selected? e.g. purposive, convenience, consecutive, snowball                                                                       |                      |
| Method of approach                             | 11       | How were participants approached? e.g. face-to-face, telephone, mail, email                                                                              |                      |
| Sample size                                    | 12       | How many participants were in the study?                                                                                                                 |                      |
| Non-participation                              | 13       | How many people refused to participate or dropped out? Reasons?                                                                                          |                      |
| <i>Setting</i>                                 |          |                                                                                                                                                          |                      |
| Setting of data collection                     | 14       | Where was the data collected? e.g. home, clinic, workplace                                                                                               |                      |
| Presence of non-participants                   | 15       | Was anyone else present besides the participants and researchers?                                                                                        |                      |
| Description of sample                          | 16       | What are the important characteristics of the sample? e.g. demographic data, date                                                                        |                      |
| <i>Data collection</i>                         |          |                                                                                                                                                          |                      |
| Interview guide                                | 17       | Were questions, prompts, guides provided by the authors? Was it pilot tested?                                                                            |                      |
| Repeat interviews                              | 18       | Were repeat interviews carried out? If yes, how many?                                                                                                    |                      |
| Audio/visual recording                         | 19       | Did the research use audio or visual recording to collect the data?                                                                                      |                      |
| Field notes                                    | 20       | Were field notes made during and/or after the interview or focus group?                                                                                  |                      |
| Duration                                       | 21       | What was the duration of the interviews or focus group?                                                                                                  |                      |
| Data saturation                                | 22       | Was data saturation discussed?                                                                                                                           |                      |
| Transcripts returned                           | 23       | Were transcripts returned to participants for comment and/or                                                                                             |                      |

| Topic                                  | Item No. | Guide Questions/Description                                                                                                        | Reported on Page No. |
|----------------------------------------|----------|------------------------------------------------------------------------------------------------------------------------------------|----------------------|
|                                        |          | correction?                                                                                                                        |                      |
| <b>Domain 3: analysis and findings</b> |          |                                                                                                                                    |                      |
| <i>Data analysis</i>                   |          |                                                                                                                                    |                      |
| Number of data coders                  | 24       | How many data coders coded the data?                                                                                               |                      |
| Description of the coding tree         | 25       | Did authors provide a description of the coding tree?                                                                              |                      |
| Derivation of themes                   | 26       | Were themes identified in advance or derived from the data?                                                                        |                      |
| Software                               | 27       | What software, if applicable, was used to manage the data?                                                                         |                      |
| Participant checking                   | 28       | Did participants provide feedback on the findings?                                                                                 |                      |
| <i>Reporting</i>                       |          |                                                                                                                                    |                      |
| Quotations presented                   | 29       | Were participant quotations presented to illustrate the themes/findings?<br>Was each quotation identified? e.g. participant number |                      |
| Data and findings consistent           | 30       | Was there consistency between the data presented and the findings?                                                                 |                      |
| Clarity of major themes                | 31       | Were major themes clearly presented in the findings?                                                                               |                      |
| Clarity of minor themes                | 32       | Is there a description of diverse cases or discussion of minor themes?                                                             |                      |

Developed from: Tong A, Sainsbury P, Craig J. Consolidated criteria for reporting qualitative research (COREQ): a 32-item checklist for interviews and focus groups. *International Journal for Quality in Health Care*. 2007. Volume 19, Number 6: pp. 349 – 357

**Once you have completed this checklist, please save a copy and upload it as part of your submission. DO NOT include this checklist as part of the main manuscript document. It must be uploaded as a separate file.**

# BMJ Open

## Establishing and augmenting views on the acceptability of a paediatric critical care randomised controlled trial (FEVER trial): a mixed methods study

|                                 |                                                                                                                                                                                                                                                                                                                                                                                                                                                                                                                                                                                                                                                                                                                                                                                                                                                                                                                                                                                                                            |
|---------------------------------|----------------------------------------------------------------------------------------------------------------------------------------------------------------------------------------------------------------------------------------------------------------------------------------------------------------------------------------------------------------------------------------------------------------------------------------------------------------------------------------------------------------------------------------------------------------------------------------------------------------------------------------------------------------------------------------------------------------------------------------------------------------------------------------------------------------------------------------------------------------------------------------------------------------------------------------------------------------------------------------------------------------------------|
| Journal:                        | <i>BMJ Open</i>                                                                                                                                                                                                                                                                                                                                                                                                                                                                                                                                                                                                                                                                                                                                                                                                                                                                                                                                                                                                            |
| Manuscript ID                   | bmjopen-2020-041952.R1                                                                                                                                                                                                                                                                                                                                                                                                                                                                                                                                                                                                                                                                                                                                                                                                                                                                                                                                                                                                     |
| Article Type:                   | Original research                                                                                                                                                                                                                                                                                                                                                                                                                                                                                                                                                                                                                                                                                                                                                                                                                                                                                                                                                                                                          |
| Date Submitted by the Author:   | 11-Jan-2021                                                                                                                                                                                                                                                                                                                                                                                                                                                                                                                                                                                                                                                                                                                                                                                                                                                                                                                                                                                                                |
| Complete List of Authors:       | Deja, Elizabeth; University of Liverpool, Department of Public Health, Policy and Systems<br>Peters, Mark; Great Ormond Street Hospital For Children NHS Trust, Paediatric Intensive Care Unit; University College London, Institute of Child Health<br>Khan, Imran ; Queen Mary University of London, Institute of Population Health Sciences<br>Mouncey, Paul; ICNARC, Clinical Trials Unit<br>Agbeko, Rachel; Great North Children's Hospital, Paediatric Intensive Care Unit<br>Fenn, Blaise; Patient partner<br>Watkins, Jason; Patient partner<br>Ramnarayan , Padmanabhan; Great Ormond Street Hospital for Children, Children's Acute Transport Service,<br>Tibby, Shane; Evelina Childrens Hospital, Paediatric Intensive Care<br>Thorburn, Kentigern; Alder Hey Childr.ens Hospital, Paediatric Intensive Care<br>Tume, Lyvonne; University of Salford, School of Health and Society<br>Rowan, Kathryn; Intensive Care National Audit and Research Centre (ICNARC),<br>Woolfall, Kerry; University of Liverpool, |
| <b>Primary Subject Heading</b>: | Intensive care                                                                                                                                                                                                                                                                                                                                                                                                                                                                                                                                                                                                                                                                                                                                                                                                                                                                                                                                                                                                             |
| Secondary Subject Heading:      | Qualitative research, Research methods, Paediatrics                                                                                                                                                                                                                                                                                                                                                                                                                                                                                                                                                                                                                                                                                                                                                                                                                                                                                                                                                                        |
| Keywords:                       | Paediatric intensive & critical care < INTENSIVE & CRITICAL CARE, PAEDIATRICS, PAIN MANAGEMENT, QUALITATIVE RESEARCH                                                                                                                                                                                                                                                                                                                                                                                                                                                                                                                                                                                                                                                                                                                                                                                                                                                                                                       |
|                                 |                                                                                                                                                                                                                                                                                                                                                                                                                                                                                                                                                                                                                                                                                                                                                                                                                                                                                                                                                                                                                            |

SCHOLARONE™  
Manuscripts



I, the Submitting Author has the right to grant and does grant on behalf of all authors of the Work (as defined in the below author licence), an exclusive licence and/or a non-exclusive licence for contributions from authors who are: i) UK Crown employees; ii) where BMJ has agreed a CC-BY licence shall apply, and/or iii) in accordance with the terms applicable for US Federal Government officers or employees acting as part of their official duties; on a worldwide, perpetual, irrevocable, royalty-free basis to BMJ Publishing Group Ltd ("BMJ") its licensees and where the relevant Journal is co-owned by BMJ to the co-owners of the Journal, to publish the Work in this journal and any other BMJ products and to exploit all rights, as set out in our [licence](#).

The Submitting Author accepts and understands that any supply made under these terms is made by BMJ to the Submitting Author unless you are acting as an employee on behalf of your employer or a postgraduate student of an affiliated institution which is paying any applicable article publishing charge ("APC") for Open Access articles. Where the Submitting Author wishes to make the Work available on an Open Access basis (and intends to pay the relevant APC), the terms of reuse of such Open Access shall be governed by a Creative Commons licence – details of these licences and which [Creative Commons](#) licence will apply to this Work are set out in our licence referred to above.

Other than as permitted in any relevant BMJ Author's Self Archiving Policies, I confirm this Work has not been accepted for publication elsewhere, is not being considered for publication elsewhere and does not duplicate material already published. I confirm all authors consent to publication of this Work and authorise the granting of this licence.

1  
2  
3 1 **Establishing and augmenting views on the acceptability of a paediatric critical care randomised**  
4  
5 2 **controlled trial (FEVER trial): a mixed methods study**  
6  
7 3

8 4 Elizabeth Deja<sup>1</sup> PhD, Mark J Peters PhD<sup>2</sup>, Imran Khan MSc<sup>3</sup> Paul R Mouncey MSc,<sup>3</sup> Rachel Agbeko  
9 5 FFICM,<sup>4</sup> Blaise Fenn,<sup>5</sup> Jason Watkins,<sup>5</sup> Padmanabhan Ramnarayan FFICM,<sup>6</sup> Shane M Tibby MB.ChB,<sup>7</sup>  
10 6 Kentigern Thorburn MMed MD,<sup>8</sup> Lyvonne N Tume PhD,<sup>9</sup> Kathryn M Rowan PhD<sup>3</sup> and, Kerry Woolfall  
11 7 PhD<sup>1</sup> on behalf of the Paediatric Intensive Care Society Study Group (PICS-SG)  
12

13 8  
14 9 **Affiliations:**

15 10 1 Institute of Population Health Sciences, University of Liverpool, Liverpool, United Kingdom  
16 11 2 Respiratory, Critical Care and Anaesthesia Unit, University College London, Great Ormond Street,  
17 12 Institute of Child Health, London, United Kingdom  
18 13 3 Institute of Population Health Sciences, Queen Mary University of London, United Kingdom  
19 14 4 Paediatric Intensive Care Unit, Great North Children's Hospital, The Newcastle upon Tyne Hospitals  
20 15 NHS Foundation Trust, Institute of Cellular Medicine, Newcastle University, Newcastle, United  
21 16 Kingdom  
22 17 5 Patient partner  
23 18 6 Children's Acute Transport Service, Great Ormond Street Hospital, London, UK  
24 19 7 Guy's & St Thomas' NHS Foundation Trust, Evelina Children's Hospital  
25 20 8 Paediatric Intensive Care Unit, Alder Hey Children's Hospital, Liverpool, UK  
26 21 9 Faculty of Health and Applied Sciences, University of the West of England, Glenside Campus,  
27 22 Bristol, United Kingdom  
28 23

29 30  
31 24 **Address correspondence to:**

32 25 Dr Elizabeth Deja. University of Liverpool, 1<sup>st</sup> Floor, Block B, Waterhouse Building, Liverpool, L69 3GL.  
33 26 Email: [E.Deja@liverpool.ac.uk](mailto:E.Deja@liverpool.ac.uk). Telephone: 0151 794 5613  
34 27  
35 28

36 29  
37 30  
38 31 **Word count: 4008**  
39 32  
40 33  
41 34  
42 35  
43 36  
44 37  
45 38  
46 39  
47 40  
48 41  
49 42  
50 43  
51 44  
52 45  
53 46  
54 47  
55 48  
56 49  
57 50  
58 51  
59 52  
60 53

## 1 ABSTRACT

2 **Objective:** To explore parent and staff views on the design of a randomised controlled trial  
3 investigating temperature thresholds for antipyretic intervention in critically ill children with fever  
4 and infection (the FEVER trial) during a multi-phase pilot study.

5 **Design:** Mixed methods study with data collected at three time points: 1) before, 2) during and 3)  
6 after a pilot trial.

7 **Setting:** English, Paediatric Intensive Care Unities (PICU).

8 **Participants:** 1) pre-pilot trial focus groups with pilot site staff (n=56) and interviews with  
9 parents(n=25) whose child had been admitted to PICU in the last three years with a Fever and  
10 suspected infection; 2) questionnaires with parents of randomised children following pilot trial  
11 recruitment (n=48 from 47 families) 3) post-pilot trial interviews with parents (n=19), focus groups  
12 (n=50) and a survey (n=48) with site staff. Analysis drew on Sekhon et al's (2017) theoretical  
13 framework of acceptability.

14 **Results:** There was initial support for the trial, yet some held concerns regarding the proposed  
15 temperature thresholds and not using paracetamol for pain or discomfort. Pre-trial findings  
16 informed protocol changes and training which influenced views on trial acceptability. Staff trained by  
17 the FEVER team found the trial more acceptable than those trained by colleagues. Parents and staff  
18 found the trial acceptable. Some concerns about pain or discomfort during weaning from ventilation  
19 remained.

20 **Conclusions:** Pre-trial findings and pilot trial experience influenced acceptability, providing insight  
21 into how challenges may be overcome. We present an adapted theoretical framework of  
22 acceptability to inform future trial feasibility studies.

## 24 KEY WORDS

25 Acceptability, Clinical trial, feasibility, Paediatric intensive care, qualitative, sepsis, practitioner  
26 training

## 28 ARTICLE SUMMARY

### 29 Strengths and limitations of this study

- 30 • The longitudinal design enabled collection of data from parents and staff with relevant  
31 experience before, during and after the pilot trial.
- 32 • The mixed methods approach including interviews, focus groups and surveys enabled breadth  
33 and depth of insight to help establish trial feasibility.
- 34 • Use of the Sekhon, Cartwright and Francis (2017) Theoretical Framework of Acceptability  
35 allowed trial acceptability to be evaluated as a multifaceted construct as opposed to a poorly  
36 defined binary (acceptable/not acceptable) approach.
- 37 • Data collected during the pilot trial stage were limited to parent perspectives, the majority of  
38 whom were mothers, although staff views were sought retrospectively.

## 1 INTRODUCTION

2 Recruitment and retention in clinical trials is a significant challenge, which leads to underpowered  
3 trials and the continued use of healthcare interventions that are not informed by robust scientific  
4 evidence [1-3]. Paediatric clinical trials are particularly challenging to conduct due to ethical and  
5 practical considerations that are not applicable to trials in adult settings [4-8]. For example, the  
6 eligible population is smaller and consent is obtained by proxy through children's parents or legal  
7 guardians [4, 9-11]. These considerations are compounded in critical care settings by the emotive  
8 and time sensitive situation in which they take place. Clinical trials must be acceptable to parents  
9 and health care practitioners to facilitate recruitment, adherence and consent [12, 13]. Sekhon,  
10 Cartwright and Francis (2017)[13] present a Theoretical Framework of Acceptability (TFA) (see Figure  
11 1) to assist researchers in assessing the acceptability of healthcare interventions, including clinical  
12 trials. The TFA presents seven theoretical constructs for researchers to consider when assessing  
13 whether people delivering or receiving a healthcare intervention consider it to be appropriate. The  
14 constructs highlight considerations when establishing acceptability, such as how an individual feels  
15 about the healthcare intervention, the perceived burden of taking part and the extent to which the  
16 participant understands the healthcare intervention and how it works.

17  
18 [INSERT FIGURE 1: Sekhon, Cartwright and Francis (2017) Theoretical Framework of Acceptability]

19 There is a lack of robust evidence or guidance to inform the management of fever due to an  
20 infection in critically ill children [14, 15]. The FEVER feasibility study aimed to establish whether it is  
21 possible to conduct a hospital based clinical trial comparing a comparing a permissive approach  
22 (treat as  $\geq 40^{\circ}\text{C}$ ) with a restrictive approach (treat at  $\geq 37.5^{\circ}\text{C}$ ) to fever management in children.  
23 Perceived challenges to the successful conduct of a fever randomised control trial (RCT) included: a  
24 protocol that was likely to differ from usual clinical practice; potential parental and staff concerns  
25 about allowing a child's fever to rise without treatment; no time to seek informed consent [16, 17];  
26 and the possibility that children may die before trial participation is discussed with parents.

27 The FEVER feasibility study involved pre-trial research with parents and staff, an observation of UK  
28 practice and a subsequent pilot RCT with embedded research exploring the perspectives of parents  
29 and staff involved in the pilot RCT. Pilot RCT and observation study findings are reported separately  
30 [18-20]. This paper focuses on research exploring parent and staff perspectives on trial acceptability  
31 drawing on the TFA.



## 1           2           3           4           5           6           7           8           9           10           11           12           13           14           15           16           17           18           19           20           21           22           23           24           25           26           27           28           29           30           31           32           33           34           35           36           37           38           39           40           41           42           43           44           45           46           47           48           49           50           51           52           53           54           55           56           57           58           59           60

# 1           **METHODS**

### 2           **Study design**

3           As part of the wider FEVER feasibility study (see Figure 2) we conducted mixed methods research  
4           involving interviews, focus groups and surveys with parents who had relevant experience and staff  
5           involved in the pilot RCT The research reported in this paper was conducted before, during and after  
6           the pilot RCT and aimed to explore parent and staff views on proposed FEVER trial including trial  
7           acceptability, design of information materials, temperature thresholds and the use of research  
8           without prior consent ). The pilot RCT took place over a 3 month period (October to December  
9           2017). Children were randomly allocated (1 : 1) using research without prior consent (RWPC) to  
10          permissive (39.5 °C) or restrictive (37.5 °C) temperature thresholds for antipyretics during their PICU  
11          stay while mechanically ventilated [19]. We used previous research that had explored patient and  
12          staff perspectives on trials conducted in paediatric emergency and critical care in the NHS [21-23] to  
13          develop topic guides for interviews and focus groups, questionnaires and participant information  
14          sheets (PIS).

15          [INSERT FIGURE 2: Fever Feasibility study design]

### 17          **Patient and public involvement**

18          Two parents (CF and JW) and one young adult (BF) with experience of severe infection and  
19          admission to hospital were co-investigators and members of the Study Management Group. They  
20          provided valuable input into the design and conduct of the study, including reviewing documents for  
21          parent interviews (e.g. draft pilot trial participant information sheets) and informing study  
22          recruitment approaches (i.e. identification of social media groups and charities). They were also  
23          involved in the review of study progress and findings.

### 24          **Pre pilot trial: prospective recruitment and conduct**

#### 25          *Parent interviews*

26          English speaking parents of children (under 16 years) that had been admitted to an intensive care  
27          unit with a fever and infection in the last three years were recruited via: a database from a previous  
28          relevant study [24]; a letter from study sites [19]; and advertising on relevant social media and at  
29          sites. Some leniency was allowed if the child was admitted close to three years prior to interview  
30          (e.g. 3 years and two months). All routes invited parents to register interest in participation by  
31          contacting the research team.

1  
2  
3 1 Psychologist ED (PhD, female research associate) responded to parents' requests to participate in  
4 2 sequential order and checked eligibility. A draft pilot RCT PIS was emailed to parents prior to  
5 3 interview which included an outline of the study and current practice on the management of fever in  
6 4 critically ill children. ED conducted in person or via telephone based on parent preference. Audio-  
7 5 recorded verbal or written consent was sought before interviews as appropriate. Audio consent  
8 6 involved reading each aspect of the consent form to parents, including consent for audio recording  
9 7 and to receive a copy of the findings when the study is complete. Each box was initialled on the  
10 8 consent form when verbal consent was provided. Informed consent discussions were audio recorded  
11 9 for auditing purposes. Interviewing stopped when data saturation [25] and variation in sample was  
12 10 reached.

### 11 *Staff focus groups*

12 Co-investigators at the four pilot RCT sites [19] disseminated invitations to all staff who would be  
13 13 involved in the conduct of a clinical trial within a paediatric intensive care unit . KW (PhD, female,  
14 14 social scientist, Senior Lecturer) or ED provided a Participant information sheet and obtained written  
15 15 informed consent before the focus group began. The topic guide consisted of a mix of open and  
16 16 closed- ended questions. Closed - ended questions were administered using a voting system (Turning  
17 17 Technologies, Youngstown, OH, USA .This allowed for the collection of staff demographic  
18 18 information, to ensure data collection from all staff on key questions, such as views on trial  
19 19 acceptability. The use of Turning Point also enabled us to show grouped findings for closed questions  
20 20 on a screen to explore reasons for views in more depth verbally during the discussion.

### 21 **Pilot RCT: Concurrent and retrospective recruitment and conduct**

22 Interim analysis of prospective data informed subsequent topic guides and questionnaires.

### 23 *Parent questionnaire and interviews*

24 As part of the pilot RCT consent discussions, site researchers asked both parents if they would like to  
25 25 complete the FEVER consent questionnaire after the pilot RCT recruitment discussion (concurrent)  
26 26 and/or take part in a telephone interview approximately a month later (retrospective). In addition to  
27 27 collecting minimal demographic information the consent questionnaire asked them to indicate how  
28 28 strongly they agreed or disagreed with twelve statements about the Fever RCT followed by tick box  
29 29 and open- ended responses regarding their consent decision. ED contacted those who consented to  
30 30 interview in sequential order (by receipt of a consent form), stratifying by study arm (lower/higher  
31 31 temperature threshold) as the study progressed ensuring parents whose children had been  
32 32 randomised to both trial arms were represented in the sample.

1  
2  
3 1 *Staff survey and focus groups*  
4  
5

6 2 At the end of the pilot RCT, ED repeated focus groups with staff at the four pilot RCT sites to explore  
7  
8 3 their experiences of pilot trial conduct and views on the proposed trial acceptability. Those unable to  
9  
10 4 attend a focus group were invited by email to complete an online questionnaire containing the same  
11  
12 5 closed- ended questions administered to focus group participants using the Turning Technologies  
13  
14 6 (Youngstown, OH, USA) voting system.

15  
16 7 **Analysis**  
17

18 8 Digital audio recordings were transcribed verbatim by a professional transcription company  
19  
20 9 (Voicescript Ltd., Bristol, UK). Transcripts were anonymised and checked for accuracy.  
21  
22

23 10 Table 1: Approach to thematic qualitative data analysis  
24

| Phase                                  | Description                                                                                                                                                                                                                                                                                                                                     |
|----------------------------------------|-------------------------------------------------------------------------------------------------------------------------------------------------------------------------------------------------------------------------------------------------------------------------------------------------------------------------------------------------|
| 1. Familiarising with data             | ED and KW read and re-read transcripts noting down initial ideas on themes.                                                                                                                                                                                                                                                                     |
| 2. Generating initial codes            | Two complementary data-coding frameworks were developed (1 focus group data (KW), 1 interview data (ED) using <i>a priori</i> codes identified from the project proposal and topic guilds. During the familiarisation stage ED and KW identified additional data-driven codes and concepts not previously captured in the initial coding frame. |
| 3. Developing the coding framework     | KW coded 10% of the interview transcripts using the initial coding frame and made notes on any new themes identified and how the framework could be refined. In turn ED coded 10% of the focus group transcripts following the same procedure.                                                                                                  |
| 4. Defining and naming themes          | Following review and reconciliation revised coding frames were subsequently developed and ordered into themes.                                                                                                                                                                                                                                  |
| 5. Completion of coding of transcripts | ED completed coding interview transcripts and KW completed coding focus group transcripts in preparation for write-up.                                                                                                                                                                                                                          |
| 6. Producing the report                | ED and KW developed the original manuscript using themes to relate back to the study aims ensuring key findings and recommendations were relevant to the FEVER trial design and site staff training (i.e. catalytic validity). Final discussion and development of selected themes occurred during the write-up phase.                          |

25  
26  
27  
28  
29  
30  
31  
32  
33  
34  
35  
36  
37  
38  
39  
40  
41  
42  
43  
44  
45  
46  
47  
48  
49  
50  
51  
52  
53  
54  
55  
56  
57  
58  
59  
60  
11

1  
2  
3 1 ED and KW used a thematic analysis approach [26] to explore themes within the data related to  
4 views on trial design and acceptability (see table 1) . Analysis was interpretive and iterative [26, 27] .  
5 2  
6 3 NVivo 10 software (QSR International Pty Ltd., Melbourne, Australia) was used to assist in the  
7 organisation and coding of qualitative data. Quantitative data from the parent and staff  
8 4  
9 questionnaires were entered into SPSS Version 20.0 (IBM Corp., Armonk, NY, US) and analysed using  
10 5  
11 descriptive statistics. Please see separate publication for further details [19]. ED and KW then  
12 6  
13 7 synthesized data and used framework analysis [28] to map findings onto each component of the TFA  
14 by time point [13] (see tables 2-4). Where illustrative quotes are provided the participant identifier  
15 8  
16 9 relates to each participant (e.g. P01 is participant 1).  
17  
18  
19  
20  
21  
22  
23  
24  
25  
26  
27  
28  
29  
30  
31  
32  
33  
34  
35  
36  
37  
38  
39  
40  
41  
42  
43  
44  
45  
46  
47  
48  
49  
50  
51  
52  
53  
54  
55  
56  
57  
58  
59  
60

Table 2: Prospective Acceptability of a FEVER Pilot Trial mapped to Sekhon et al's acceptability framework (2017)

| Group & data collection method | Affective attitude                                                                                                                                                                                                                                                                 | Burden                                                                                                                                                                                                       | Ethicality                                                                                                                                                                                               | Intervention Coherence                                                                                                                                                                             | Opportunity Costs                                                                                                                                                                                                                                                                          | Perceived Effectiveness                                                                                                                                                                                                                                                                    | Self-Efficacy                                                                                                                                                                              |
|--------------------------------|------------------------------------------------------------------------------------------------------------------------------------------------------------------------------------------------------------------------------------------------------------------------------------|--------------------------------------------------------------------------------------------------------------------------------------------------------------------------------------------------------------|----------------------------------------------------------------------------------------------------------------------------------------------------------------------------------------------------------|----------------------------------------------------------------------------------------------------------------------------------------------------------------------------------------------------|--------------------------------------------------------------------------------------------------------------------------------------------------------------------------------------------------------------------------------------------------------------------------------------------|--------------------------------------------------------------------------------------------------------------------------------------------------------------------------------------------------------------------------------------------------------------------------------------------|--------------------------------------------------------------------------------------------------------------------------------------------------------------------------------------------|
| Parents Interviews             | 100% stated they would consent for their child to take part in a Fever RCT<br><br>Would consent with a 40°C threshold, but 39.5-39.9°C more acceptable<br><i>"I think 39.5 [°C]. But again you guys know best I'm just saying ...that's very hot."</i> (P17, father, non-bereaved) | The intervention was not invasive<br><br>Concerns about unnecessary discomfort /pain in higher threshold                                                                                                     | Belief it is important to help other children in the future.<br><br>Use of RWPC is necessary <i>"I understand there's not really another way you can do it"</i> (P01, mother, non-bereaved)              | Logically 'make sense' (P02, mother, bereaved).<br>PIS "it's simple for them to read. (P06, mother, bereaved)<br><br>Many suggested changes to the PIS to assist understanding and decision making | Children would still be given all other kinds of care/ interventions<br><br>Concerns about loss of non-antipyretics effects of paracetamol e.g. reducing risk of seizures/riggers, pain relief.                                                                                            | When study rationale was explained parents understood how allowing a fever could have a positive impact:<br><i>"Fever is meant to be like part of a fighting off, healing process isn't it?"</i> (P07, mother, non-bereaved)                                                               | The intervention was something parents understood and said they could support<br>Important to approach for RWPC when parents have the capacity to make an informed decision                |
| Staff Focus group              | 82% (45/55, one missing) indicated 39.5°C was an acceptable permissive temperature threshold.<br>18.2% suggested 40°C was acceptable. Only 20.4% suggested 37.5°C was acceptable as may lead to unnecessary intervention.                                                          | Watching a child be in pain or experience negative side effects: <i>"Incredibly difficult to wait and watch"</i> (P05, Staff, FG5).<br>The trial would be more acceptable if limited to ventilated children. | Mixed views on RWPC, n=25/49, (51%) thought acceptable based on past experience and the emergency situation.<br><br>Concerns about use of RWPC for an intervention that may not be supported by parents. | Understanding that optimal temperature thresholds are unknown<br><br>Want more clinical evidence as it goes against experiential knowledge (e.g. administering antipyretic at 38°C)                | Concerns about the loss of non-antipyretic effects e.g. discomfort relief, reducing risk of seizures/riggers, decreased cardio work load.<br><br>Staff with no experience of RWPC had concerns it would negatively impact on trust and the <i>"working relationship"</i> (P03, Staff, FG1) | Evidence to support the trial: <i>"Well there is, there is a bit of science which suggests we should let the temperature get higher"</i> (P01, Staff, FG3)<br><br>Waiting for the permissive threshold would go against their clinical training or <i>"gut instinct"</i> (P05, Staff, FG2) | No perceived issues with taking a temperature. Query method that is going to be used.<br><br>Nurses stated they may not follow the protocol if a child was upset, combative, in discomfort |

Table 2 Key: shaded fields highlight potentially unacceptable aspects of the trial. *Abbreviations:* Research Without Prior Consent (RWPC), Focus Group (FG), Randomised Control Trial (RCT)

Table 3: Parent concordant acceptability of a FEVER Pilot Trial mapped to Sekhon et al’s acceptability framework (2017)

| Data collection method   | Affective attitude                                               | Burden                           | Ethicality                                                                  | Intervention Coherence                                                                                                   | Opportunity Costs                                                                                                                                                                                                                                                                                     | Perceived Effectiveness                                                 | Self-Efficacy                                                                             |
|--------------------------|------------------------------------------------------------------|----------------------------------|-----------------------------------------------------------------------------|--------------------------------------------------------------------------------------------------------------------------|-------------------------------------------------------------------------------------------------------------------------------------------------------------------------------------------------------------------------------------------------------------------------------------------------------|-------------------------------------------------------------------------|-------------------------------------------------------------------------------------------|
| Parents<br>Questionnaire | N= 92/100 (92%) consented to taking part in the Fever Pilot RCT. | Not collected at this Time point | N= 32/41 (79%) reported the belief medical research studies are important   | N= 46/48, (96%) agreed that the information received about the Fever pilot RCT was clear & straightforward to understand | <i>My child is comfortable”</i> (P49, questionnaire, mother, permissive)                                                                                                                                                                                                                              | N= 30/41 (73.2%) selected helping my child as a reason for taking part. | N= 41,(89.4%) felt they made the decision for their child to take part in the pilot trial |
|                          |                                                                  |                                  | N= 42/48 (89.4%) satisfied with the RWPC process in the Fever pilot RCT     |                                                                                                                          | Concerns about their child being in pain or discomfort and impact on pre-existing medical condition.<br><i>“My son had too many underlying medical conditions and felt it may hinder his recovery as he was selected to the upper limit before treatment</i> (P73, questionnaire, father, permissive) |                                                                         |                                                                                           |
|                          |                                                                  |                                  | N= 32/41 (78%) selected helping other children as a reason for taking part. |                                                                                                                          |                                                                                                                                                                                                                                                                                                       |                                                                         |                                                                                           |

Table 3 Key: shaded fields highlight potentially unacceptable aspects of the trial. *Abbreviations:* Randomised Control Trial (RCT), Research Without Prior Consent (RWPC)

Table 4 Key: shaded fields highlight potentially unacceptable aspects of the trial. *Abbreviations:* Research Without Prior Consent (RWPC), Focus Group (FG), Randomised Control Trial (RCT)

Table 4: Retrospective Acceptability of a FEVER Pilot Trial mapped to Sekhon et al's acceptability framework (2017)

| Group & data collection method(s)     | Affective attitude                                                                                                                                                                                                                                                                                                                                                               | Burden                                                                                                                                                                                                                                                                             | Ethicality                                                                                                                                                                                                                                                                                     | Intervention Coherence                                                                                                                                     | Opportunity Costs                                                                                                                                                             | Perceived Effectiveness                                                                                                                 | Self-Efficacy                                                                                                                                                                                                                                                                        |
|---------------------------------------|----------------------------------------------------------------------------------------------------------------------------------------------------------------------------------------------------------------------------------------------------------------------------------------------------------------------------------------------------------------------------------|------------------------------------------------------------------------------------------------------------------------------------------------------------------------------------------------------------------------------------------------------------------------------------|------------------------------------------------------------------------------------------------------------------------------------------------------------------------------------------------------------------------------------------------------------------------------------------------|------------------------------------------------------------------------------------------------------------------------------------------------------------|-------------------------------------------------------------------------------------------------------------------------------------------------------------------------------|-----------------------------------------------------------------------------------------------------------------------------------------|--------------------------------------------------------------------------------------------------------------------------------------------------------------------------------------------------------------------------------------------------------------------------------------|
| <b>Parents Interviews</b>             | <i>'I think it's a brilliant idea, so I'm all, I'm all for it'</i> (P80, interview mother, permissive). Decliners also approve the trial <i>"They seem to be quick let's give them paracetamol. we've always been like a kind of, a hold off [ . . . ] I think sometimes paracetamol can hide other things going on as well."</i> (P83, interview, mother, permissive, decliner) | Not invasive <i>"I mean if it was more of an invasive study, I might have had to query it a little bit more but I was happy with everything"</i> (Parent 53, interview, father, restrictive).<br><br>When being weaned of venerator some children displayed discomfort / distress. | Not causing harm to their child: <i>"I just thought, There's no harm in letting her into the study"</i> (P78, interview, mother, restrictive).<br><br>Wish to help others <i>"if it's gonna help other people then yeah"</i> (P85, interview, father, restrictive).<br><br>RWPC was acceptable | Involved treatment, which parents were familiar with; that logically made sense; that was <i>"Clearly explained"</i> (P74, interview, mother, permissive), | 37.5°C ,very acceptable as normal practice at home<br><br>39.5°C acceptable if child is not in discomfort<br><br>≥39.5 °C not acceptable if the child is in pain or distress. | Understand how a fever may logically help a child.<br><br>Concerns about negative impact due to child's pre-existing medical conditions | Valued ability to withdraw or decline consent. <i>"I was happy enough for him to undergo the trial but if at any point the nurses thought he could do with the Calpol, or I thought he could, then I wanted the trial to stop it could do."</i> (P49, interview, mother, permissive) |
| <b>Staff Focus group &amp; Survey</b> | 85 % (n=81/95) trial acceptable<br><br>95% (n=95/100, four missing) 37. °C acceptable<br><br>53% (n=42/79) 39.5°C acceptable                                                                                                                                                                                                                                                     | If the child is not conscious or not in pain no burden                                                                                                                                                                                                                             | Parents think the trial is acceptable therefore it is ethical to randomise their children.<br><br>89.4 % (n= 42/48) satisfied with the use of RWPC                                                                                                                                             | If trained by trial team. Then 39.5°C acceptable                                                                                                           | Mixed views, some observed no negative side effects and reported no costs.                                                                                                    | Seeing as believing, <i>"It's a really good, valuable study to see on a larger scale"</i> (P04, Staff, FG5).                            | Valued being involved in trial design. Ability to follow the protocol mixed, n= 52/96 (54%) <i>"technically very easy to follow"</i> (P06, Staff, FG1)                                                                                                                               |

## RESULTS

### Participant characteristics

*Prospective (Pre-pilot RCT):* 25 semi-structured interviews (n=20 mothers, n=5 fathers) with bereaved (n=6) and non-bereaved (n=19) parents (see figure 3). Parents were interviewed a median of 14 months (range 6-38 months) after admission. Interviews took a median of 48 minutes (range 15-105 minutes). The 15-minute interview was concluded part way through by a bereaved father. Fifty-six staff took part in six focus groups across the four sites, lasting a median of 50 minutes (range 31-59 minutes). Staff mainly self-identified as nurses (n=45, 81%), all were involved in the clinical care of children.

[INSERT FIGURE 3: Participant characteristics by time point]

*Concurrent (During-pilot RCT):* Eighty parents of the 100 children randomised to the pilot RCT consented to receive questionnaire, of these, 48 from 47 families completed and returned a questionnaire while their child was admitted to hospital. Of these, 41/48 (85%) provided consent and 6/48 (13%) declined consent (n=1 missing).

*Retrospective (Post-pilot RCT):* Sixty- six parents of the 100 children randomised to the FEVER pilot trial consented to be contacted for an interview. Data saturation [25] was reached after eight interviews with parents of children allocated to the restrictive (lower) temperature threshold and after 11 interviews with parents of children allocated to the permissive (higher) temperature threshold. Parents were interviewed a median of 31 days after randomisation (range 9-70 days). Their children had received treatment for respiratory illness (e.g. bronchiolitis and respiratory syncytial virus) (n=18/19, 94%), cancer (n=1/19, 5%) and septic shock (n=1/19, 5%). Interviews took an average 32 minutes (range 20-50 minutes).

The staff sample included 98 site staff across all four pilot RCT sites. Almost half (48/98, 49 %) completed the questionnaire, with the rest attending a focus group. The majority (n=75, 77%) were nurses, n=45 (60%) were senior-level staff and most (n=79/98, 81%) were involved in the clinical care of children. Focus groups took an average of 53 minutes (range 23-106 minutes).

### Pre-trial, prospective acceptability

All parents interviewed described how they would hypothetically consent for the use of their child's information in the proposed trial. Parents' views on trial acceptability appeared to be influenced by factors including: all other treatments for infection are given (*Opportunity costs*); the non-invasive nature of the intervention (*Burden*); support for RWPC in this context (*Ethicality*); trust in medical



1  
2  
3 staff to act in the best interests of their child; and a belief that the trial question made sense and  
4 therefore likely to achieve its purpose (*Perceived effectiveness*):

5  
6  
7 *“cause fever is meant to be like part of a fighting off, healing process isn't it? A natural one...*  
8  
9 *I can understand exactly why it would be interesting to see what happens.” (P07, mother,*  
10 *non-bereaved)*

11  
12 Although analysis of pre-RCT data indicated that many of the constructs of acceptability were met  
13 (see Table 2), there were also aspects of burden, opportunity costs, ethicality and intervention  
14 coherence identified as problematic by both parents and staff. As shown in Table 2, staff concerns  
15 outweighed support at this stage.

16  
17 The majority of parents were not worried about the proposed restrictive temperature threshold of  
18 37.5°C. However, staff expressed concerns that this was too low a threshold to administer an  
19 antipyretic (n=43/54, 80%, two missing) and would go against perceived “*normal practice*” (P01,  
20 Staff, FG4). A common concern was that children would be given unnecessary treatments in a clinical  
21 context where “*we try and give the minimum amount of drugs*” (P02, Staff, FG5) (*Affective attitude*).

22  
23 In contrast, many parents voiced concerns about the acceptability of the permissive threshold with  
24 regards to increased risk of “*seizures*” (P03, mother, non-bereaved) and other potential detrimental  
25 side effects (opportunity costs), such as “*organs shutting down*” (P07, mother, non-bereaved),  
26 “*rigger*” (P06, mother, bereaved) or unnecessary discomfort (*Burden*). The majority suggested that  
27 the pilot RCT would be more acceptable if the permissive temperature threshold was slightly lower  
28 (e.g. 39.9°C or 39.5°C). Although parents stated that they would still consent to a trial involving a  
29 threshold of 40°C (*Affective attitude*), as they trusted staff to monitor their child and act in their best  
30 interests:

31  
32  
33 *“I would trust that my child was being monitored, it's not like they're waiting for her*  
34 *condition to get worse before they do something, you are having, a nurse by your bedside at*  
35 *all times, I had complete trust.” (P25, mother, non-bereaved)*

36  
37 Staff also described how a permissive threshold of  $\geq 40^{\circ}\text{C}$  was too high and how they would be  
38 concerned about not using paracetamol for analgesia in the less unwell, spontaneously breathing  
39 patients, who may be in pain or discomfort (*Burden*). In addition, staff were concerned about  
40 parental acceptability of the permissive threshold, RWPC (*Ethicality, Opportunity costs*) and the  
41 impact of increased cardiac workload (*Opportunity costs*).

42  
43 Both groups understood the aims of the proposed trial. However, in addition to changes to  
44 temperature thresholds, amendments to the protocol were suggested. Parents identified aspects of  
45  
46  
47  
48  
49  
50  
51  
52  
53  
54  
55  
56  
57  
58  
59  
60

1  
2  
3 the PIS that required clarification, including whether not treating a temperature could cause a  
4 seizure, incorporating an explanation of how all other treatments would still be given. Staff  
5 requested additional information about the scientific evidence underpinning the research question,  
6 as well as clarification on key issues, such as what cooling methods could be used.  
7  
8  
9

### 10 **Response to pre-trial findings**

11  
12 Pre-trial findings were used in conjunction with observation study findings [19] to develop the pilot  
13 RCT protocol and site training. These included: a permissive temperature threshold of  $\geq 39.5^{\circ}\text{C}$ ;  
14 inclusion criteria that required patients to be mechanically ventilated, therefore likely to be on other  
15 analgesia and changes to information materials. For example, staff training and PIS incorporated  
16 evidence to demonstrate how fever does not cause seizures and observation study findings that  
17 showed the restrictive temperature threshold ( $\geq 37.5^{\circ}\text{C}$ ) falls within usual practice. To address staff  
18 concerns about how parents may respond to trial and RWPC discussions, parent perspectives were  
19 communicated in site training, highlighting parental acceptability of RWPC, temperature thresholds,  
20 parents' questions about the study, and suggestions on how to address such questions.  
21  
22  
23  
24  
25  
26  
27  
28

### 29 **Concurrent acceptability**

30  
31 As demonstrated in Table 3, parent questionnaire data showed that the six constructs of  
32 acceptability measured during this time point were met. Parents reported that the study information  
33 '*was clear and straightforward to understand*' (*Intervention coherence*). Ninety two percent of  
34 randomised children received consent for their continued participation in the pilot RCT (Affective  
35 attitude) [19]. Main reasons for providing consent related to the belief that participation might help  
36 their child ( $n=30/41$ , 73%, *Perceived effectiveness*) and help other children in the future ( $n=32/41$ ,  
37 78%, *Ethicality*). Parents also found the study acceptable because "*my child was comfortable*" (P49,  
38 questionnaire, mother, permissive) (*Opportunity costs and Burden*).  
39  
40  
41  
42  
43  
44

45 Of the eight that refused consent to continue, seven (88%) had been allocated to the permissive  
46 (higher) treatment group. Data suggested that parents who declined some element of their child  
47 participation still supported the proposed Fever RCT. Reasons for refusal of consent were linked to  
48 pre-existing medical conditions and the wish to limit any discomfort experienced by their child: "*My*  
49 *son had too many underlying medical conditions and felt it may hinder his recovery as he was*  
50 *selected to the upper limit*" (P73, questionnaire, father, permissive). Suggesting that there were still  
51 some concerns about withholding analgesia (*Opportunity costs*).  
52  
53  
54  
55  
56

57 Staff acceptability was not measured at this point.  
58  
59  
60

### Post-trial, retrospective acceptability

Interviews conducted with parents a median one-month post randomisation supported and provided further insights into questionnaire findings. All seven constructs of acceptability were met (see table 4). Parents were interested in the trial question and felt the proposed trial was important (*Affective attitude, Perceived effectiveness*). Parents described staff as approaching them appropriately, with well-timed, clear, comprehensive study information leading to strong intervention coherence:

*"I understood what they were saying and was happy to sort of go ahead, with the trial. If it wasn't explained to me too well, I probably wouldn't have bothered doing it."* (P77, interview, father, restrictive) (*Intervention coherence*)

Parents of children allocated to the restrictive temperature threshold found the trial very acceptable as giving paracetamol at this temperature was *"something that I would do myself anyway"* (P82, interview, father, restrictive) (*Ethicality*). Parents also viewed the permissive threshold to be acceptable. However, this acceptability was conditional on their child not being in discomfort (*Opportunity costs*):

*"The only thing would be if she wasn't on any other kind of pain relief, but there's other things to manage, her discomfort"*. (P73, interview, father, permissive)

Indeed, two mothers described how they found the trial acceptable and gave full consent, but later chose to withdraw their child from the study when they were being weaned from ventilation and sedation due to concerns about their child being in pain or distress. Parents valued the ability to withdraw or decline consent (*Self-efficacy*). They also described how they trusted staff to act in their child's best interests, including not adhering to the protocol by administering an antipyretic if at any point staff felt that it was needed (*Burden and Opportunity costs*):

*"I know if anything did happen, you's can stop at any time. Stop it if they saw it was getting out of hand and he, and I felt like it, it wasn't helping, that I would stop it....they wouldn't let him go to the stage of him getting poorly"*. (P85, interview, father, restrictive)

Unlike parents' views, which largely remained consistent across study time points, staff perceptions of the acceptability of the lower temperature shifted during the course of the pilot RCT. Witnessing patient's positive reactions to RWPC and trial discussions and an awareness that  $\geq 37.5^{\circ}\text{C}$  was usual practice, resulted in 95% (n=95/100, four missing) of staff rating the restrictive threshold as acceptable or very acceptable: *"Everybody that was in the lower end of it, I found were like happy to take part"* (P01, Staff, FG4).

1  
2  
3 Staff had mixed views about the acceptability of the permissive temperature threshold.  
4  
5 Approximately half (n=42/79, 53%) indicated that the  $\geq 39.5^{\circ}\text{C}$  threshold was acceptable. They valued  
6  
7 how the trial team responded to their pre-trial concerns by changing the inclusion criteria to omit  
8  
9 non-ventilated children (*Self-efficacy*). Some stated that their previous concerns about high  
10  
11 temperatures causing harm or discomfort (*Opportunity costs*) and parents having a negative  
12  
13 response to the trial and RWPC (*Ethicality*) were not observed:

14  
15 *"Some patients are randomised into the higher temperature and people see that they're*  
16  
17 *actually manageable and it doesn't cause them any harm... It's kind of seeing is believing."*

18  
19 (P03, Staff, FG1)

20  
21 Staff who did not find the permissive temperature acceptable were concerned about not giving  
22  
23 paracetamol for pain or discomfort when a child was conscious (*Opportunity costs*). These concerns  
24  
25 meant that some staff administered paracetamol before a child's temperature had reached  $\geq 39.5^{\circ}\text{C}$ :  
26  
27 *"I feel like potentially we're making our patients more uncomfortable."* (P01, Staff, FG2)

28  
29 Interestingly, staff trained by their local unit colleagues were significantly more likely to find the  
30  
31 permissive threshold not acceptable when compared to those trained directly by the pilot trial team  
32  
33 ( $\chi^2(2) = 8.78$ ,  $p = 0.012$ ). Staff trained colleagues also rated site training as being poor (n=11/97,  
34  
35 11%). These staff remained unclear about the scientific rationale for the study and had lower  
36  
37 Intervention coherence.

38  
39 Despite issues with aspects of *Intervention coherence* and *Opportunity costs*, overall staff rated the  
40  
41 fever trial acceptable (n=81/95, 85 %, *Affective attitude*) and practicable to conduct (n=80/95, 84%,  
42  
43 *Self-efficacy*). Findings suggest that their views could be further augmented if the proposed Fever  
44  
45 RCT protocol was revised to also exclude patients receiving non-invasive forms of ventilation (e.g.  
46  
47 high-flow nasal oxygen) or those close to being extubated when sedation is being weaned.

## 48 49 **Trust**

50  
51 During data analysis, we found that the concept of trust between parents and staff was prevalent  
52  
53 within our data and intrinsically linked to trial acceptability. For example, parents found the trial  
54  
55 acceptable because they trusted staff to put the needs of their child before the requirements of the  
56  
57 study. Both groups discussed the trust parents place in medical expertise during a very emotive  
58  
59 situation. Staff also highlighted that maintaining parental trust impacts on their decisions *"I feel like*  
60  
*there's an element of trust there that would be broken from my point of view."* (P01, Staff, FG2,

1  
2  
3 retrospective). The construct of 'Trust' is not reflected within the TFA. We present an adapted TFA in  
4 Figure 4 incorporating Trust.  
5

6  
7 [INSERT FIGURE 4: The adapted Theoretical framework of Acceptability]  
8

## 9 10 **DISCUSSION**

11  
12 Our study highlights the value of conducting pre-trial research with key stakeholders to inform the  
13 design of challenging clinical trials [29]. Research with parents and staff, helped establish trial  
14 acceptability, as well as influence and changed perspectives over time. Prospective qualitative  
15 research identified mixed staff views, whilst parents found the trial broadly acceptable. Both the  
16 parental and staff support for RWPC in time critical trials is constant with previous research [24, 30-  
17 34]. Aspects of *Intervention Coherence, Opportunity Costs, Ethicality and Burden* [13] were identified  
18 that threatened trial success. The majority of staff concerns related to not using paracetamol or  
19 active cooling for pain relief, or to prevent febrile seizures [18]. Prospective findings informed  
20 changes to the PIS, staff training package and the addition of mechanical ventilation to inclusion  
21 criteria. Data from the concurrent and retrospective time points showed a positive response to such  
22 changes, particularly amongst staff. Suggestions to further augment views on trial acceptability and  
23 reduce the number of potential protocol deviations and withdrawals were identified. These include  
24 changes to trial inclusion criteria as well as staff training content and delivery [18].  
25  
26

27  
28 Our findings demonstrate Sekhon and Francis' (2017) assertion that the acceptability of healthcare  
29 interventions is not a fixed construct. If we had taken a binary (acceptable/ not acceptable) or  
30 snapshot approach to determining acceptability, then we would not have been able to identify and  
31 address key concerns that threatened trial acceptability and ultimately, trial feasibility. The TFA was  
32 demonstrated to be comprehensive and relevant to our work. However, we found that the concept  
33 of trust between parents and staff was closely linked to trial acceptability and is not reflected in the  
34 framework. The importance of trust is a recurring theme in healthcare and medicine but is  
35 particularly salient in paediatric trials, as the more vulnerable the population, the greater the need  
36 for trust [5, 35]. Drawing on Hall et al's (2001) [35] work into defining trust in medical relationships,  
37 we propose the addition of an eighth construct of 'Trust' to help inform future trial feasibility  
38 research (see Figure 4). Further research is needed to test the adapted model in establishing the  
39 feasibility of other healthcare interventions and settings. This work will help to establish the  
40 appropriateness of trust as additional construct in the TFA.  
41  
42  
43  
44  
45  
46  
47  
48  
49  
50  
51  
52  
53  
54  
55

56  
57 As the pilot trial was conducted in three months, during the busy winter period the concurrent work  
58 only included parents and therefore lacks insight into staff perspectives during pilot trial conduct.  
59  
60

1  
2  
3 This limitation was compensated for by the use of retrospective (1 week-1 month) mixed methods  
4 ensuring a larger sample, through the survey and depth of insights, through focus groups. Insight  
5 was gained into the views of 8 (2 interviews 6 questionnaires) out of 18 parents (44%) who had  
6 declined their child's continued participation in one or more aspect of the pilot RCT. In particular,  
7 the interviews with parents who declined consent and nursing staff who found the protocol  
8 challenging to follow provided valuable information to assist with refining the study process for a  
9 definitive RCT. However, it is unknown whether or not the predominantly positive views of the  
10 declining parents who took part in an interview or questionnaire were shared by other parents who  
11 declined the FEVER pilot RCT.  
12  
13  
14  
15  
16  
17  
18  
19  
20

21 In summary challenges to delivering the proposed trial included staff and parent concerns about the  
22 acceptability of the proposed protocol. Pre-trial research, staff training and experience of pilot trial  
23 conduct augmented views, providing insight into how challenges may be overcome, such as changes  
24 to the inclusion criteria and delivery of site training. We present an adapted TFA to inform the design  
25 of future trial feasibility studies.  
26  
27  
28  
29

### 30 **Acknowledgements**

31 The authors would like to thank all the parents who shared their experiences with us; their  
32 contribution to the research is invaluable. The authors are grateful to all the staff at participating UK  
33 hospitals and charities/ support groups for their help with recruitment and the UK PICS Study Group  
34 (PICS-SG) for their contributions to this study. We would also like to thank Ms Clara Francis (CF) as  
35 co-investigator and patient partner.  
36  
37  
38  
39  
40

### 41 **Funding**

42 This study was funded by the UK National Institute for Health Research Health Technology  
43 Assessment programme (15/44/01) and supported by the National Institute for Health Research  
44 Great Ormond Street Hospital Biomedical Research Centre. The trial sponsor was Great Ormond  
45 Street Hospital NHS Foundation Trust, Joint R&D Office GOSH/ICH, 30 Guilford Street, London WC1N  
46 1EH, United Kingdom (email: Research.Governance@gosh.nhs.uk). The Clinical Trials Unit for the  
47 Fever study was the ICNARC CTU. The views expressed in this publication are those of the authors  
48 and not necessarily of the funder, the sponsor, the NHS, the NIHR, or the UK Department of Health.  
49  
50  
51  
52  
53  
54  
55

### 56 **Ethics approval and consent to participate**

57 Ethical approval for the study was provided by the National Research Ethics Committee (NRES)  
58 (17/LO/1139). Management approvals were obtained from all study sites.  
59  
60

**Data statement**

The datasets generated during and/or analysed during the current study are not publicly available as consent was not sought for data sharing.

**Competing interests' statement.**

MJP is a member of the NIHR HTA Board. KMR is a member of the NIHR HS & DR Board.

**Author contributions**

Dr Elizabeth Deja conducted the qualitative research, co-analysed the data, drafted the initial manuscript, reviewed and revised the manuscript.

Professor Mark J Peters is the chief investigator of the FEVER study, he conceived, designed and oversaw conduct of the FEVER study and critically reviewed the manuscript.

Mr Imran Khan was the study manager at the ICNARC CTU responsible for day to day FEVER study management and critically reviewed the manuscript.

Mr Paul R Mouncey is the head of research at ICNARC CTU, a co-applicant, involved in the design and coordination of the FEVER study, contributed to and reviewed the manuscript.

Mr Blaise Fenn and Mr Jason Watkins were study co-applicants, patient and parent representatives who contributed to the design and conduct of the FEVER study including mixed methods perspectives elements.

Dr Padmanabhan Ramnarayan co-applicant helped design and conduct the FEVER study.

Dr Rachel Agbeko, Dr Shane M Tibby, Professor Lyvonne N Tume were co-applicants, site principal investigators and critically reviewed the manuscript.

Dr Kentigern Thorburn site principal investigator and critically reviewed the manuscript.

Dr Kathryn M Rowan is the director at ICNARC CTU, study co-applicant involved in designing and overseeing the FEVER study.

Dr Kerry Woolfall was a co-applicant on the FEVER study, designed the mixed methods perspectives elements of the study, supervised the qualitative research, co-analysed the data and reviewed and revised the manuscript.

**Licence statement**

I, the Submitting Author has the right to grant and does grant on behalf of all authors of the Work (as defined in the below author licence), an exclusive licence and/or a non-exclusive licence for contributions from authors who are: i) UK Crown employees; ii) where BMJ has agreed a CC-BY licence shall apply, and/or iii) in accordance with the terms applicable for US Federal Government officers or employees acting as part of their official duties; on a worldwide, perpetual, irrevocable, royalty-free basis to BMJ Publishing Group Ltd ("BMJ") its licensees and where the relevant Journal is co-owned by BMJ to the co-owners of the Journal, to publish the Work in BMJ Open and any other BMJ products and to exploit all rights, as set out in our licence.

**REFERENCES**



1. McDonald AM, Knight RC, Campbell MK, et al. What influences recruitment to randomised controlled trials? A review of trials funded by two UK funding agencies. *Trials*. 2006;7(9).
2. Bower P, Brueton V, Gamble C, et al. Interventions to improve recruitment and retention in clinical trials: a survey and workshop to assess current practice and future priorities. *Trials*. 2014;15(399).
3. Treweek S, Mitchell E, Pitkethly M, et al. Strategies to improve recruitment to randomised controlled trials. *Cochrane Database Syst Re*. 2010.
4. Caldwell P, Murphy S, Butow P, Craig J. Clinical trials in children *The Lancet*. 2004;364(9436):803-11.
5. Greenberg RG, Gamel B, Bloom D, et al. Parents' perceived obstacles to pediatric clinical trial participation: Findings from the clinical trials transformation initiative *Contemporary Clinical Trials Communications*. 2018.
6. Sammons HM, Starkey ES. Ethical issues of clinical trials in children. *Paediatrics and child health* 2011;22(2).
7. Field MJ, Behrman RE. Institute of Medicine (U.S.). Committee on Clinical Research Involving Children., *Ethical Conduct of Clinical Research Involving Children*. Washington, D.C.: National Academies Press; 2004.
8. Naka F, Strober B, Shahriari M. Clinical trials: Kids are not just little people. *Clinics in Dermatology*. 2017;35(6):583-93.
9. Caldwell PHY, Butow PN, Craig JC. Pediatricians' attitudes towards randomized controlled trials involving children. *The Journal of Pediatrics* 2002;141(6).
10. Caldwell P, Butow P, Craig J. Parents' attitudes to randomised controlled trials involving children. *Journal of Pediatrics* 2003;145:555-60.
11. Enpr-EMA. Preparedness of medicines' clinical trials in paediatrics. Amsterdam: European Medicines Agency; 2020.
12. Diepeveen S, Ling T, Suhrcke M, Roland M, Marteau TM. Public acceptability of government intervention to change health-related behaviours: a systematic review and narrative synthesis. *BMC Public health* 2013;13(756).
13. Sekhon M, Cartwright M, Francis JJ. Acceptability of healthcare interventions: an overview of reviews and development of a theoretical framework. *BMC Health Services Research*. 2017;17(88).
14. Brick T, Agbeko RS, Davies P, et al. Too hot to handle: a survey of attitudes towards fever of 462 pediatric intensive care unit staff. *Eur J Pediatr* 2016;176:423-7.
15. NICE. *Fever in Under 5s: Assessment and Initial Management*. In: guideline N, editor. London: National Institute for Health and Care Excellence; 2019. p. 1-36.
16. Proposal for a Regulation of the European Parliament and of the Council on Clinical trials on medicinal products for human use, and repealing Directive 2001/20/EC., (2013).
17. The Medicines for human use (Clinical trials) and Blood Safety and Quality (Amendment) Regulations., (2008).
18. Peters MJ, Woolfall K, Khan I, et al. Permissive versus restrictive temperature thresholds in critically ill children with fever and infection: a multicentre randomized clinical pilot trial. *Critical Care*. 2019;23(1):69.
19. Peters MJ, Woolfall K, Khan I, et al. Different temperature thresholds for antipyretic intervention in critically ill children with fever due to infection: the FEVER feasibility RCT. *Health Technology Assessment* 2019;23(5):1 - 148.
20. Woolfall K, O'Hara C, Deja E, et al. Parents' prioritised outcomes for trials investigating treatments for paediatric severe infection: a qualitative synthesis. *Arch Dis Child*. 2019;0:1-6.
21. Woolfall K, Frith L, Gamble C, et al. How parents and practitioners experience research without prior consent (deferred consent) for emergency research involving children with life threatening conditions: a mixed method study. *BMJ Open*. 2015;5.
22. Inwald DP, Canter R, Woolfall K, et al. Restricted fluid bolus volume in early septic shock: results of the Fluids in Shock pilot trial. *Arch Dis Child*. 2018.



- 1  
2  
3  
4  
5  
6  
7  
8  
9  
10  
11  
12  
13  
14  
15  
16  
17  
18  
19  
20  
21  
22  
23  
24  
25  
26  
27  
28  
29  
30  
31  
32  
33  
34  
35  
36  
37  
38  
39  
40  
41  
42  
43  
44  
45  
46  
47  
48  
49  
50  
51  
52  
53  
54  
55  
56  
57  
58  
59  
60
23. Molyneux S, Njue M, Boga M, et al. The words will pass with the blowing wind': staff and parent views of the deferred consent process, with prior assent, used in an emergency fluids trial in two African hospitals. *PLOS ONE* 2013;8(8).
  24. Inwald D, Canter R, Woolfall K, et al. Restricted fluid bolus versus current practice in children with septic shock: the FiSh feasibility study and pilot RCT. *Health Technol Assess*. 2018;22(51).
  25. Saunder B, Sim J, Kingstone T, et al. Saturation in qualitative research: exploring its conceptualization and operationalization. *Qual Quant*. 2018;52(4).
  26. Braun V, Clarke V. Using thematic analysis in psychology. *Qualitative research in psychology*. 2006;3(2):77-101.
  27. Braun V, Clarke V. What can "thematic analysis" offer health and wellbeing researchers? *International journal of qualitative studies on health and well-being*. 2014;9:26152.
  28. Gale NK, Heath G, Cameron E, Rashid S, Redwood S. Using the framework method for the analysis of qualitative data in multi-disciplinary health research. *BMC Medical Research Methodology*. 2013;13(117).
  29. O'Cathain A, Thomas KJ, Drabble SJ, Rudolph A, Goode J, Hewison J. Maximising the value of combining qualitative research and randomised controlled trials in health research: the QUALitative Research in Trials (QUART) study--a mixed methods study. *Health Technol Assess*. 2014;18(38):1-197, v-vi.
  30. Canvin K, Jacoby A. Duty, desire or indifference? A qualitative study of patient decisions about recruitment to an epilepsy treatment trial. *Trials*. 2006;7(32).
  31. Roper L, Sherratt FC, Young B, et al. Children's views on research without prior consent in emergency situations: a UK qualitative study. *BMJ open* 2018;8.
  32. Waterfield T, Lyttle MD, Shields M, et al. Parents' and clinicians' views on conducting paediatric diagnostic test accuracy studies without prior informed consent: qualitative insight from the Petechiae in Children study (PiC). *Archives of Disease in Childhood*. 2019:317.
  33. Woolfall K, Frith L, Dawson A, Gamble C, Lyttle MD, Young B. Fifteen-minute consultation: an evidence-based approach to research without prior consent (deferred consent) in neonatal and paediatric critical care trials. *Archives of disease in childhood - Education and practice edition*. 2016;101(1):49-53.
  34. Brierley J, Larcher V. Emergency research in children: options for ethical recruitment. *Journal of Medical Ethics*. 2011;37(7):429-32.
  35. Hall MA, Dugan E, Zheng B, Mishra AK. Trust in Physicians and Medical Institutions: What Is It, Can It Be Measured, and Does It Matter? *The Milbank Quarterly*. 2001;79(4).

**LEDGENDS**

Figure 1: Sekhon, Cartwright and Francis (2017) Theoretical Framework of Acceptability

Figure 2: Fever Feasibility study design

Figure 3: Participant characteristics by time point

Table 1: Approach to qualitative data analysis

Table 2: Prospective Acceptability of a FEVER Pilot Trial mapped to Sekhon et al's  
acceptability framework (2017)

Table 3: Parent concordant acceptability of a FEVER Pilot Trial mapped to Sekhon et al's  
acceptability framework (2017)

Table 4: Respective Acceptability of a FEVER Pilot Trial mapped to Sekhon et al's  
acceptability framework (2017)

Figure 4: The adapted Theoretical framework of Acceptability

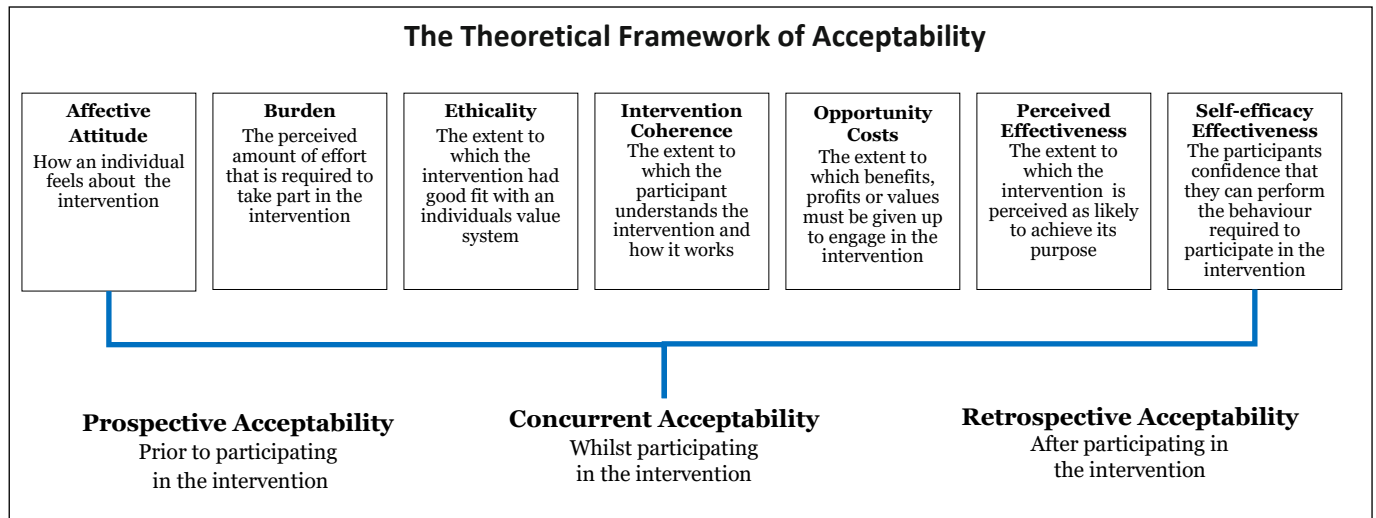

**Stage 1**

Pre trial feasibility research including:

- Interviews with Parents with experience their child being admitted to an intensive care unit with a fever and suspected infection in the preceding 3 years
- Focus groups with clinicians (nurses and doctors) working the 4 PICUs planned to be included in the pilot
- Observational study of UK practice related to fever management\*

**Stage 2**

- Pilot RCT in 4 hospitals comparing a permissive approach (treat as  $\geq 40^{\circ}\text{C}$ ) with a restrictive approach (treat at  $\geq 37.5^{\circ}\text{C}$ ) to fever management in children\*
- Embedded survey to explore parent perspectives at the point of trial recruitment.

**Stage 3**

- Interviews with parents of children randomised to the pilot RCT approximately one month after hospital discharge.
- Survey and focus groups with staff involved in the pilot RCT at the end of trial recruitment.

\*reported separately

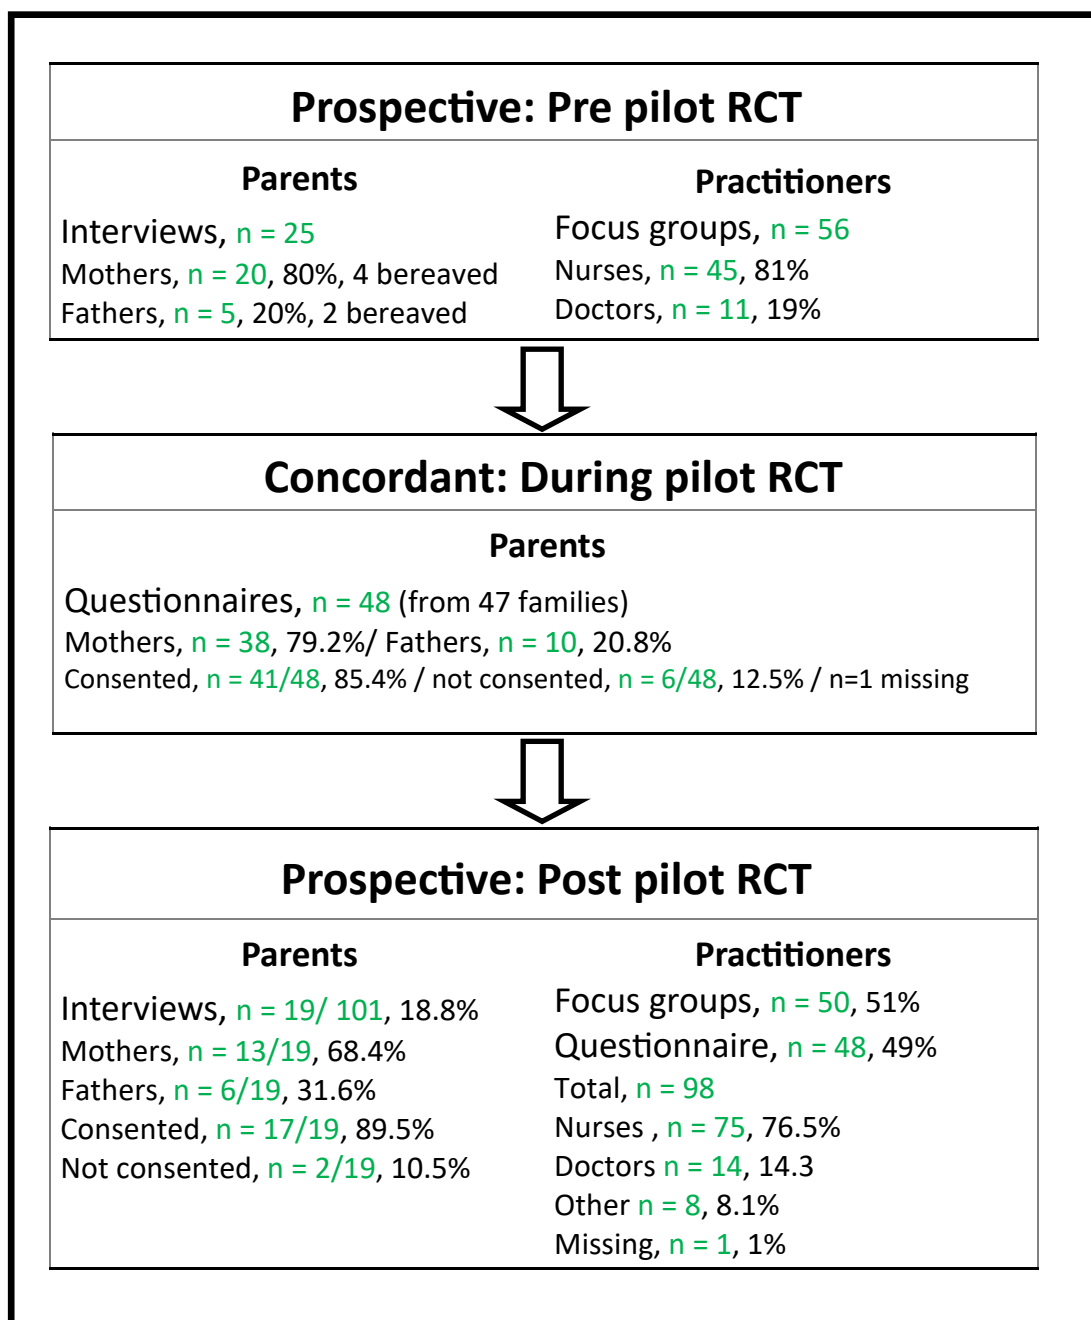

1  
2  
3  
4  
5  
6  
7  
8  
9  
10  
11  
12  
13  
14  
15  
16  
17  
18  
19  
20  
21  
22  
23  
24  
25  
26  
27  
28  
29  
30  
31  
32  
33  
34  
35  
36  
37  
38  
39  
40  
41  
42  
43  
44  
45  
46

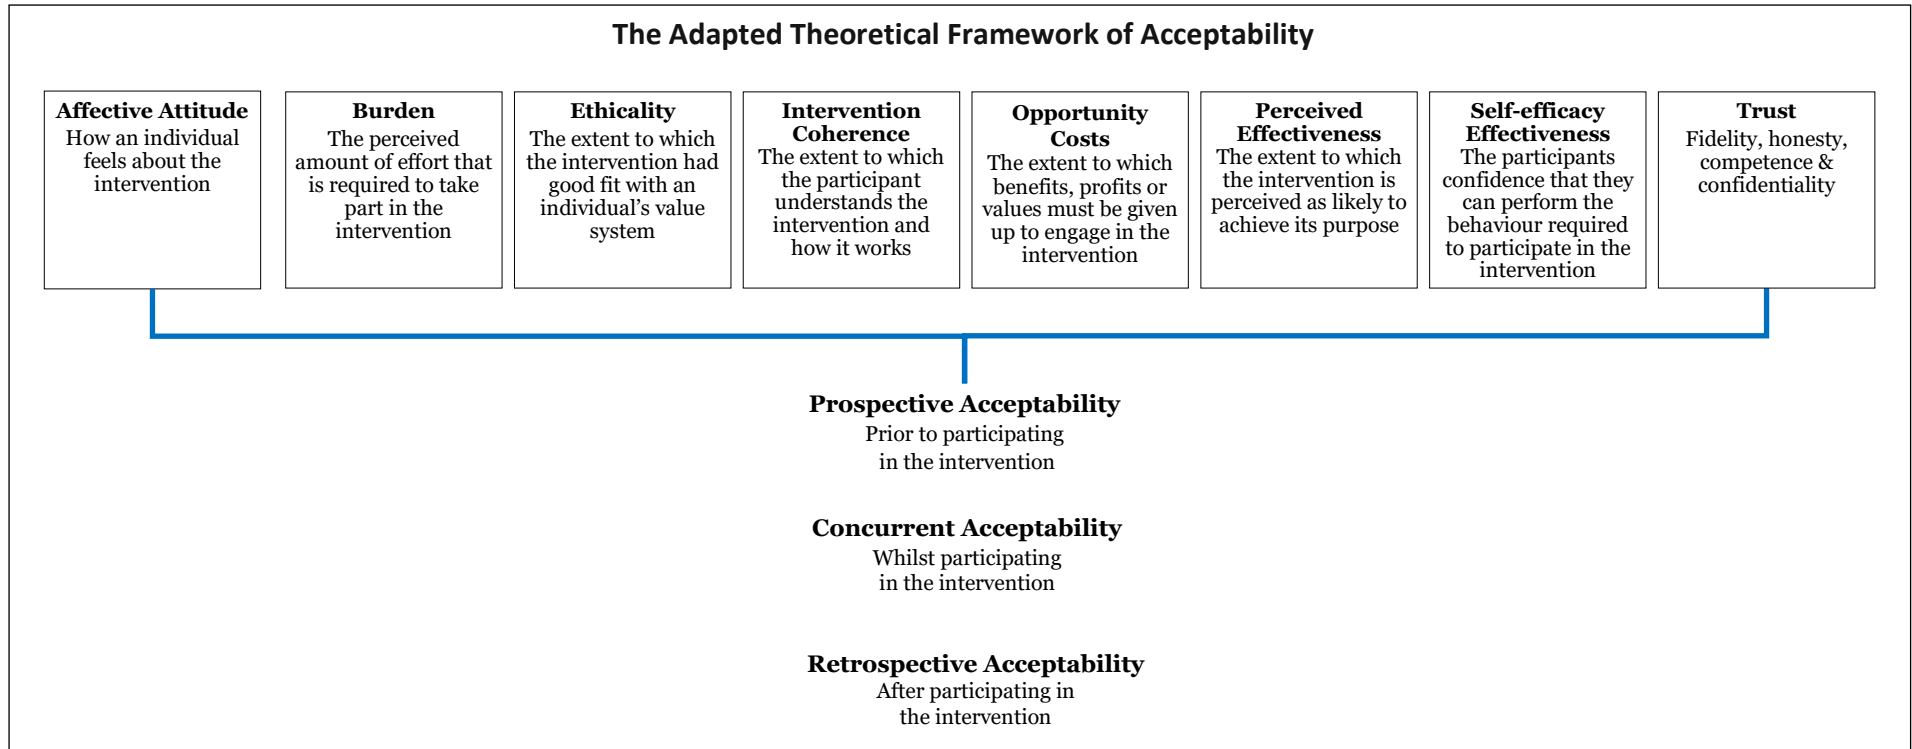

## COREQ (COnsolidated criteria for REporting Qualitative research) Checklist

A checklist of items that should be included in reports of qualitative research. You must report the page number in your manuscript where you consider each of the items listed in this checklist. If you have not included this information, either revise your manuscript accordingly before submitting or note N/A.

| Topic                                          | Item No. | Guide Questions/Description                                                                                                                              | Reported on Page No. |
|------------------------------------------------|----------|----------------------------------------------------------------------------------------------------------------------------------------------------------|----------------------|
| <b>Domain 1: Research team and reflexivity</b> |          |                                                                                                                                                          |                      |
| <i>Personal characteristics</i>                |          |                                                                                                                                                          |                      |
| Interviewer/facilitator                        | 1        | Which author/s conducted the interview or focus group?                                                                                                   |                      |
| Credentials                                    | 2        | What were the researcher's credentials? E.g. PhD, MD                                                                                                     |                      |
| Occupation                                     | 3        | What was their occupation at the time of the study?                                                                                                      |                      |
| Gender                                         | 4        | Was the researcher male or female?                                                                                                                       |                      |
| Experience and training                        | 5        | What experience or training did the researcher have?                                                                                                     |                      |
| <i>Relationship with participants</i>          |          |                                                                                                                                                          |                      |
| Relationship established                       | 6        | Was a relationship established prior to study commencement?                                                                                              |                      |
| Participant knowledge of the interviewer       | 7        | What did the participants know about the researcher? e.g. personal goals, reasons for doing the research                                                 |                      |
| Interviewer characteristics                    | 8        | What characteristics were reported about the interviewer/facilitator? e.g. Bias, assumptions, reasons and interests in the research topic                |                      |
| <b>Domain 2: Study design</b>                  |          |                                                                                                                                                          |                      |
| <i>Theoretical framework</i>                   |          |                                                                                                                                                          |                      |
| Methodological orientation and Theory          | 9        | What methodological orientation was stated to underpin the study? e.g. grounded theory, discourse analysis, ethnography, phenomenology, content analysis |                      |
| <i>Participant selection</i>                   |          |                                                                                                                                                          |                      |
| Sampling                                       | 10       | How were participants selected? e.g. purposive, convenience, consecutive, snowball                                                                       |                      |
| Method of approach                             | 11       | How were participants approached? e.g. face-to-face, telephone, mail, email                                                                              |                      |
| Sample size                                    | 12       | How many participants were in the study?                                                                                                                 |                      |
| Non-participation                              | 13       | How many people refused to participate or dropped out? Reasons?                                                                                          |                      |
| <i>Setting</i>                                 |          |                                                                                                                                                          |                      |
| Setting of data collection                     | 14       | Where was the data collected? e.g. home, clinic, workplace                                                                                               |                      |
| Presence of non-participants                   | 15       | Was anyone else present besides the participants and researchers?                                                                                        |                      |
| Description of sample                          | 16       | What are the important characteristics of the sample? e.g. demographic data, date                                                                        |                      |
| <i>Data collection</i>                         |          |                                                                                                                                                          |                      |
| Interview guide                                | 17       | Were questions, prompts, guides provided by the authors? Was it pilot tested?                                                                            |                      |
| Repeat interviews                              | 18       | Were repeat interviews carried out? If yes, how many?                                                                                                    |                      |
| Audio/visual recording                         | 19       | Did the research use audio or visual recording to collect the data?                                                                                      |                      |
| Field notes                                    | 20       | Were field notes made during and/or after the interview or focus group?                                                                                  |                      |
| Duration                                       | 21       | What was the duration of the interviews or focus group?                                                                                                  |                      |
| Data saturation                                | 22       | Was data saturation discussed?                                                                                                                           |                      |
| Transcripts returned                           | 23       | Were transcripts returned to participants for comment and/or                                                                                             |                      |

| Topic                                  | Item No. | Guide Questions/Description                                                                                                        | Reported on Page No. |
|----------------------------------------|----------|------------------------------------------------------------------------------------------------------------------------------------|----------------------|
|                                        |          | correction?                                                                                                                        |                      |
| <b>Domain 3: analysis and findings</b> |          |                                                                                                                                    |                      |
| <i>Data analysis</i>                   |          |                                                                                                                                    |                      |
| Number of data coders                  | 24       | How many data coders coded the data?                                                                                               |                      |
| Description of the coding tree         | 25       | Did authors provide a description of the coding tree?                                                                              |                      |
| Derivation of themes                   | 26       | Were themes identified in advance or derived from the data?                                                                        |                      |
| Software                               | 27       | What software, if applicable, was used to manage the data?                                                                         |                      |
| Participant checking                   | 28       | Did participants provide feedback on the findings?                                                                                 |                      |
| <i>Reporting</i>                       |          |                                                                                                                                    |                      |
| Quotations presented                   | 29       | Were participant quotations presented to illustrate the themes/findings?<br>Was each quotation identified? e.g. participant number |                      |
| Data and findings consistent           | 30       | Was there consistency between the data presented and the findings?                                                                 |                      |
| Clarity of major themes                | 31       | Were major themes clearly presented in the findings?                                                                               |                      |
| Clarity of minor themes                | 32       | Is there a description of diverse cases or discussion of minor themes?                                                             |                      |

Developed from: Tong A, Sainsbury P, Craig J. Consolidated criteria for reporting qualitative research (COREQ): a 32-item checklist for interviews and focus groups. *International Journal for Quality in Health Care*. 2007. Volume 19, Number 6: pp. 349 – 357

**Once you have completed this checklist, please save a copy and upload it as part of your submission. DO NOT include this checklist as part of the main manuscript document. It must be uploaded as a separate file.**



# BMJ Open

## Establishing and augmenting views on the acceptability of a paediatric critical care randomised controlled trial (FEVER trial): a mixed methods study

|                                 |                                                                                                                                                                                                                                                                                                                                                                                                                                                                                                                                                                                                                                                                                                                                                                                                                                                                                                                                                                                                                            |
|---------------------------------|----------------------------------------------------------------------------------------------------------------------------------------------------------------------------------------------------------------------------------------------------------------------------------------------------------------------------------------------------------------------------------------------------------------------------------------------------------------------------------------------------------------------------------------------------------------------------------------------------------------------------------------------------------------------------------------------------------------------------------------------------------------------------------------------------------------------------------------------------------------------------------------------------------------------------------------------------------------------------------------------------------------------------|
| Journal:                        | <i>BMJ Open</i>                                                                                                                                                                                                                                                                                                                                                                                                                                                                                                                                                                                                                                                                                                                                                                                                                                                                                                                                                                                                            |
| Manuscript ID                   | bmjopen-2020-041952.R2                                                                                                                                                                                                                                                                                                                                                                                                                                                                                                                                                                                                                                                                                                                                                                                                                                                                                                                                                                                                     |
| Article Type:                   | Original research                                                                                                                                                                                                                                                                                                                                                                                                                                                                                                                                                                                                                                                                                                                                                                                                                                                                                                                                                                                                          |
| Date Submitted by the Author:   | 02-Feb-2021                                                                                                                                                                                                                                                                                                                                                                                                                                                                                                                                                                                                                                                                                                                                                                                                                                                                                                                                                                                                                |
| Complete List of Authors:       | Deja, Elizabeth; University of Liverpool, Department of Public Health, Policy and Systems<br>Peters, Mark; Great Ormond Street Hospital For Children NHS Trust, Paediatric Intensive Care Unit; University College London, Institute of Child Health<br>Khan, Imran ; Queen Mary University of London, Institute of Population Health Sciences<br>Mouncey, Paul; ICNARC, Clinical Trials Unit<br>Agbeko, Rachel; Great North Children's Hospital, Paediatric Intensive Care Unit<br>Fenn, Blaise; Patient partner<br>Watkins, Jason; Patient partner<br>Ramnarayan , Padmanabhan; Great Ormond Street Hospital for Children, Children's Acute Transport Service,<br>Tibby, Shane; Evelina Childrens Hospital, Paediatric Intensive Care<br>Thorburn, Kentigern; Alder Hey Childr.ens Hospital, Paediatric Intensive Care<br>Tume, Lyvonne; University of Salford, School of Health and Society<br>Rowan, Kathryn; Intensive Care National Audit and Research Centre (ICNARC),<br>Woolfall, Kerry; University of Liverpool, |
| <b>Primary Subject Heading</b>: | Intensive care                                                                                                                                                                                                                                                                                                                                                                                                                                                                                                                                                                                                                                                                                                                                                                                                                                                                                                                                                                                                             |
| Secondary Subject Heading:      | Qualitative research, Research methods, Paediatrics, Ethics                                                                                                                                                                                                                                                                                                                                                                                                                                                                                                                                                                                                                                                                                                                                                                                                                                                                                                                                                                |
| Keywords:                       | Paediatric intensive & critical care < INTENSIVE & CRITICAL CARE, PAEDIATRICS, PAIN MANAGEMENT, QUALITATIVE RESEARCH, MEDICAL EDUCATION & TRAINING                                                                                                                                                                                                                                                                                                                                                                                                                                                                                                                                                                                                                                                                                                                                                                                                                                                                         |
|                                 |                                                                                                                                                                                                                                                                                                                                                                                                                                                                                                                                                                                                                                                                                                                                                                                                                                                                                                                                                                                                                            |

SCHOLARONE™  
Manuscripts



I, the Submitting Author has the right to grant and does grant on behalf of all authors of the Work (as defined in the below author licence), an exclusive licence and/or a non-exclusive licence for contributions from authors who are: i) UK Crown employees; ii) where BMJ has agreed a CC-BY licence shall apply, and/or iii) in accordance with the terms applicable for US Federal Government officers or employees acting as part of their official duties; on a worldwide, perpetual, irrevocable, royalty-free basis to BMJ Publishing Group Ltd ("BMJ") its licensees and where the relevant Journal is co-owned by BMJ to the co-owners of the Journal, to publish the Work in this journal and any other BMJ products and to exploit all rights, as set out in our [licence](#).

The Submitting Author accepts and understands that any supply made under these terms is made by BMJ to the Submitting Author unless you are acting as an employee on behalf of your employer or a postgraduate student of an affiliated institution which is paying any applicable article publishing charge ("APC") for Open Access articles. Where the Submitting Author wishes to make the Work available on an Open Access basis (and intends to pay the relevant APC), the terms of reuse of such Open Access shall be governed by a Creative Commons licence – details of these licences and which [Creative Commons](#) licence will apply to this Work are set out in our licence referred to above.

Other than as permitted in any relevant BMJ Author's Self Archiving Policies, I confirm this Work has not been accepted for publication elsewhere, is not being considered for publication elsewhere and does not duplicate material already published. I confirm all authors consent to publication of this Work and authorise the granting of this licence.

1  
2  
3 1 **Establishing and augmenting views on the acceptability of a paediatric critical care randomised**  
4  
5 2 **controlled trial (FEVER trial): a mixed methods study**  
6  
7 3

8 4 Elizabeth Deja<sup>1</sup> PhD, Mark J Peters PhD<sup>2</sup>, Imran Khan MSc<sup>3</sup> Paul R Mouncey MSc,<sup>3</sup> Rachel Agbeko  
9 5 FFICM,<sup>4</sup> Blaise Fenn,<sup>5</sup> Jason Watkins,<sup>5</sup> Padmanabhan Ramnarayan FFICM,<sup>6</sup> Shane M Tibby MB.ChB,<sup>7</sup>  
10 6 Kentigern Thorburn MMed MD,<sup>8</sup> Lyvonne N Tume PhD,<sup>9</sup> Kathryn M Rowan PhD<sup>3</sup> and, Kerry Woolfall  
11 7 PhD<sup>1</sup> on behalf of the Paediatric Intensive Care Society Study Group (PICS-SG)  
12

13 8  
14 9 **Affiliations:**

15 10 1 Institute of Population Health Sciences, University of Liverpool, Liverpool, United Kingdom  
16 11 2 Respiratory, Critical Care and Anaesthesia Unit, University College London, Great Ormond Street,  
17 12 Institute of Child Health, London, United Kingdom  
18 13 3 Institute of Population Health Sciences, Queen Mary University of London, United Kingdom  
19 14 4 Paediatric Intensive Care Unit, Great North Children's Hospital, The Newcastle upon Tyne Hospitals  
20 15 NHS Foundation Trust, Institute of Cellular Medicine, Newcastle University, Newcastle, United  
21 16 Kingdom  
22 17 5 Patient partner  
23 18 6 Children's Acute Transport Service, Great Ormond Street Hospital, London, UK  
24 19 7 Guy's & St Thomas' NHS Foundation Trust, Evelina Children's Hospital  
25 20 8 Paediatric Intensive Care Unit, Alder Hey Children's Hospital, Liverpool, UK  
26 21 9 Faculty of Health and Applied Sciences, University of the West of England, Glenside Campus,  
27 22 Bristol, United Kingdom  
28 23

29 30  
31 24 **Address correspondence to:**

32 25 Dr Elizabeth Deja. University of Liverpool, 1<sup>st</sup> Floor, Block B, Waterhouse Building, Liverpool, L69 3GL.  
33 26 Email: [E.Deja@liverpool.ac.uk](mailto:E.Deja@liverpool.ac.uk). Telephone: 0151 794 5613  
34 27  
35 28

36 29  
37 30  
38 31 **Word count:** 4018  
39 32  
40 33  
41 34  
42 35  
43 36  
44 37  
45 38  
46 39  
47 40  
48 41  
49 42  
50 43  
51 44  
52 45  
53 46  
54 47  
55 48  
56 49  
57 50  
58 51  
59 52  
60 53

## 1 ABSTRACT

2 **Objective:** To explore parent and staff views on the acceptability of a randomised controlled trial  
3 investigating temperature thresholds for antipyretic intervention in critically ill children with fever  
4 and infection (the FEVER trial) during a multi-phase pilot study.

5 **Design:** Mixed methods study with data collected at three time points: 1) before, 2) during and 3)  
6 after a pilot trial.

7 **Setting:** English, Paediatric Intensive Care Units (PICU).

8 **Participants:** 1) pre-pilot trial focus groups with pilot site staff (n=56) and interviews with  
9 parents(n=25) whose child had been admitted to PICU in the last three years with a Fever and  
10 suspected infection; 2) questionnaires with parents of randomised children following pilot trial  
11 recruitment (n=48 from 47 families) 3) post-pilot trial interviews with parents (n=19), focus groups  
12 (n=50) and a survey (n=48) with site staff. Analysis drew on Sekhon et al's (2017) theoretical  
13 framework of acceptability.

14 **Results:** There was initial support for the trial, yet some held concerns regarding the proposed  
15 temperature thresholds and not using paracetamol for pain or discomfort. Pre-trial findings  
16 informed protocol changes and training which influenced views on trial acceptability. Staff trained by  
17 the FEVER team found the trial more acceptable than those trained by colleagues. Parents and staff  
18 found the trial acceptable. Some concerns about pain or discomfort during weaning from ventilation  
19 remained.

20 **Conclusions:** Pre-trial findings and pilot trial experience influenced acceptability, providing insight  
21 into how challenges may be overcome. We present an adapted theoretical framework of  
22 acceptability to inform future trial feasibility studies.

## 24 KEY WORDS

25 Acceptability, Clinical trial, feasibility, Paediatric intensive care, qualitative, sepsis, practitioner  
26 training

## 28 ARTICLE SUMMARY

### 29 Strengths and limitations of this study

- 30 • The longitudinal design enabled collection of data from parents and staff with relevant  
31 experience before, during and after the pilot trial.
- 32 • The mixed methods approach including interviews, focus groups and surveys enabled breadth  
33 and depth of insight to help establish trial feasibility.
- 34 • Use of the Sekhon, Cartwright and Francis (2017) Theoretical Framework of Acceptability  
35 allowed trial acceptability to be evaluated as a multifaceted construct as opposed to a poorly  
36 defined binary (acceptable/not acceptable) approach.
- 37 • Data collected during the pilot trial stage were limited to parent perspectives, the majority of  
38 whom were mothers, although staff views were sought retrospectively.

## 1 INTRODUCTION

2 Recruitment and retention in clinical trials is a significant challenge, which leads to underpowered  
3 trials and the continued use of healthcare interventions that are not informed by robust scientific  
4 evidence [1-3]. Paediatric clinical trials are particularly challenging to conduct due to ethical and  
5 practical considerations that are not applicable to trials in adult settings [4-8]. For example, the  
6 eligible population is smaller and consent is obtained by proxy through children's parents or legal  
7 guardians [4, 9-11]. These considerations are compounded in critical care settings by the emotive  
8 and time sensitive situation in which they take place. Clinical trials must be acceptable to parents  
9 and health care practitioners to facilitate recruitment, adherence and consent [12, 13]. Sekhon,  
10 Cartwright and Francis (2017)[13] present a Theoretical Framework of Acceptability (TFA) (see Figure  
11 1) to assist researchers in assessing the acceptability of healthcare interventions, including clinical  
12 trials. The TFA presents seven theoretical constructs for researchers to consider when assessing  
13 whether people delivering or receiving a healthcare intervention consider it to be appropriate. The  
14 constructs highlight considerations when establishing acceptability, such as how an individual feels  
15 about the healthcare intervention, the perceived burden of taking part and the extent to which the  
16 participant understands the healthcare intervention and how it works.

17  
18 [INSERT FIGURE 1: Sekhon, Cartwright and Francis (2017) Theoretical Framework of Acceptability]

19 There is a lack of robust evidence or guidance to inform the management of fever due to an  
20 infection in critically ill children [14, 15]. The FEVER feasibility study aimed to establish whether it is  
21 possible to conduct a hospital based clinical trial comparing a permissive approach (treat as  $\geq 40^{\circ}\text{C}$ )  
22 with a restrictive approach (treat at  $\geq 37.5^{\circ}\text{C}$ ) to fever management in children. Perceived challenges  
23 to the successful conduct of a fever randomised control trial (RCT) included: a protocol that was  
24 likely to differ from usual clinical practice; potential parental and staff concerns about allowing a  
25 child's fever to rise without treatment; no time to seek informed consent [16, 17]; and the possibility  
26 that children may die before trial participation is discussed with parents.

27 The FEVER feasibility study involved a multi-phase pilot study including: pre-trial research with  
28 parents and staff, an observation of UK practice and a subsequent pilot RCT with embedded  
29 research exploring the perspectives of parents and staff involved in the pilot RCT. The FEVER Pilot  
30 RCT (ISRCTN16022198) and FEVER observational study (NCT03028818) findings are reported  
31 separately [18-20]. This paper focuses on research exploring parent and staff perspectives on trial  
32 acceptability drawing on the TFA.

33



1  
2  
3 1 Psychologist ED (PhD, female research associate) responded to parents' requests to participate in  
4 2 sequential order and checked eligibility. A draft pilot RCT PIS was emailed to parents prior to  
5 3 interview which included an outline of the study and current practice on the management of fever in  
6 4 critically ill children. ED conducted interviews in person or via telephone based on parent  
7 5 preference. Audio-recorded verbal or written consent was sought before interviews as appropriate.  
8 6 Audio consent involved reading each aspect of the consent form to parents, including consent for  
9 7 audio recording and to receive a copy of the findings when the study is complete. Each box was  
10 8 initialled on the consent form when verbal consent was provided. Informed consent discussions  
11 9 were audio recorded for auditing purposes. Interviewing stopped when data saturation [25] and  
12 10 variation in sample was reached.

### 11 *Staff focus groups*

12 Co-investigators at the four pilot RCT sites [19] disseminated invitations to all staff who would be  
13 13 involved in the conduct of a clinical trial within a paediatric intensive care unit. KW (PhD, female,  
14 14 social scientist, Senior Lecturer) or ED provided a PIS and obtained written informed consent before  
15 15 the focus group began. The topic guide consisted of a mix of open and closed- ended questions.  
16 16 Closed - ended questions were administered using the Turning Technologies (Youngstown, OH, USA)  
17 17 voting system. .This allowed for the collection of staff demographic information, to ensure data  
18 18 collection from all staff on key questions, such as views on trial acceptability. The use of Turning  
19 19 Point also enabled us to show grouped findings for closed questions on a screen to explore reasons  
20 20 for views in more depth verbally during the discussion.

### 21 **Pilot RCT: Concurrent and retrospective recruitment and conduct**

22 Interim analysis of prospective data informed subsequent topic guides and questionnaires.

### 23 *Parent questionnaire and interviews*

24 As part of the pilot RCT consent discussions, site researchers asked both parents if they would like to  
25 25 complete the FEVER consent questionnaire after the pilot RCT recruitment discussion (concurrent)  
26 26 and/or take part in a telephone interview approximately a month later (retrospective). In addition to  
27 27 collecting minimal demographic information the consent questionnaire asked them to indicate how  
28 28 strongly they agreed or disagreed with twelve statements about the Fever RCT followed by tick box  
29 29 and open- ended responses regarding their consent decision. ED contacted those who consented to  
30 30 interview in sequential order (by receipt of a consent form), stratifying by study arm (lower/higher

1 temperature threshold) as the study progressed ensuring parents whose children had been  
 2 randomised to both trial arms were represented in the sample.

### 3 *Staff survey and focus groups*

4 At the end of the pilot RCT, ED repeated focus groups with staff at the four pilot RCT sites to explore  
 5 their experiences of pilot trial conduct and views on the proposed trial acceptability. Those unable to  
 6 attend a focus group were invited by email to complete an online questionnaire containing the same  
 7 closed- ended questions administered to focus group participants using the Turning Technologies  
 8 (Youngstown, OH, USA) voting system.

## 9 **Analysis**

10 Digital audio recordings were transcribed verbatim by a professional transcription company  
 11 (Voicescript Ltd., Bristol, UK). Transcripts were anonymised and checked for accuracy.

12 Table 1: Approach to thematic qualitative data analysis

| Phase                                  | Description                                                                                                                                                                                                                                                                                                                                     |
|----------------------------------------|-------------------------------------------------------------------------------------------------------------------------------------------------------------------------------------------------------------------------------------------------------------------------------------------------------------------------------------------------|
| 1. Familiarising with data             | ED and KW read and re-read transcripts noting down initial ideas on themes.                                                                                                                                                                                                                                                                     |
| 2. Generating initial codes            | Two complementary data-coding frameworks were developed (1 focus group data (KW), 1 interview data (ED) using <i>a priori</i> codes identified from the project proposal and topic guilds. During the familiarisation stage ED and KW identified additional data-driven codes and concepts not previously captured in the initial coding frame. |
| 3. Developing the coding framework     | KW coded 10% of the interview transcripts using the initial coding frame and made notes on any new themes identified and how the framework could be refined. In turn ED coded 10% of the focus group transcripts following the same procedure.                                                                                                  |
| 4. Defining and naming themes          | Following review and reconciliation revised coding frames were subsequently developed and ordered into themes.                                                                                                                                                                                                                                  |
| 5. Completion of coding of transcripts | ED completed coding interview transcripts and KW completed coding focus group transcripts in preparation for write-up.                                                                                                                                                                                                                          |
| 6. Producing the report                | ED and KW developed the original manuscript using themes to relate back to the study aims ensuring key findings and recommendations were relevant to the FEVER trial design and site staff training (i.e. catalytic validity). Final discussion and                                                                                             |



|  |                                                                    |
|--|--------------------------------------------------------------------|
|  | development of selected themes occurred during the write-up phase. |
|--|--------------------------------------------------------------------|

1  
2  
3  
4  
5  
6 1  
7  
8 2 ED and KW used a thematic analysis approach [26] to explore themes within the data related to  
9  
10 3 views on trial design and acceptability (see table 1) . Analysis was interpretive and iterative [26, 27] .  
11 4 NVivo 10 software (QSR International Pty Ltd., Melbourne, Australia) was used to assist in the  
12  
13 5 organisation and coding of qualitative data. Quantitative data from the parent and staff  
14  
15 6 questionnaires were entered into SPSS Version 20.0 (IBM Corp., Armonk, NY, US) and analysed using  
16  
17 7 descriptive statistics. Please see separate publication for further details [19]. ED and KW then  
18  
19 8 synthesized data and used framework analysis [28] to map findings onto each component of the TFA  
20  
21 9 by time point [13] (see tables 2-4). Where illustrative quotes are provided the participant identifier  
22  
23 10 relates to each participant (e.g. P01 is participant 1).  
24  
25  
26  
27  
28  
29  
30  
31  
32  
33  
34  
35  
36  
37  
38  
39  
40  
41  
42  
43  
44  
45  
46  
47  
48  
49  
50  
51  
52  
53  
54  
55  
56  
57  
58  
59  
60

Table 2: Prospective Acceptability of a FEVER Pilot Trial mapped to Sekhon et al’s acceptability framework (2017)

| Group & data collection method | Affective attitude                                                                                                                                                                                                                                                                 | Burden                                                                                                                                                                                                       | Ethicality                                                                                                                                                                                               | Intervention Coherence                                                                                                                                                                             | Opportunity Costs                                                                                                                                                                                                                                                                         | Perceived Effectiveness                                                                                                                                                                                                                                                                    | Self-Efficacy                                                                                                                                                                              |
|--------------------------------|------------------------------------------------------------------------------------------------------------------------------------------------------------------------------------------------------------------------------------------------------------------------------------|--------------------------------------------------------------------------------------------------------------------------------------------------------------------------------------------------------------|----------------------------------------------------------------------------------------------------------------------------------------------------------------------------------------------------------|----------------------------------------------------------------------------------------------------------------------------------------------------------------------------------------------------|-------------------------------------------------------------------------------------------------------------------------------------------------------------------------------------------------------------------------------------------------------------------------------------------|--------------------------------------------------------------------------------------------------------------------------------------------------------------------------------------------------------------------------------------------------------------------------------------------|--------------------------------------------------------------------------------------------------------------------------------------------------------------------------------------------|
| Parents Interviews             | 100% stated they would consent for their child to take part in a Fever RCT<br><br>Would consent with a 40°C threshold, but 39.5-39.9°C more acceptable<br><i>“I think 39.5 [°C]. But again you guys know best I’m just saying ...that’s very hot.”</i> (P17, father, non-bereaved) | The intervention was not invasive<br><br>Concerns about unnecessary discomfort /pain in higher threshold                                                                                                     | Belief it is important to help other children in the future.<br><br>Use of RWPC is necessary <i>“I understand there’s not really another way you can do it”</i> (P01, mother, non-bereaved)              | Logically ‘make sense’ (P02, mother, bereaved).<br>PIS “it’s simple for them to read. (P06, mother, bereaved)<br><br>Many suggested changes to the PIS to assist understanding and decision making | Children would still be given all other kinds of care/ interventions<br><br>Concerns about loss of non-antipyretics effects of paracetamol e.g. reducing risk of seizures/rigors, pain relief.                                                                                            | When study rationale was explained parents understood how allowing a fever could have a positive impact:<br><i>“Fever is meant to be like part of a fighting off, healing process isn’t it?”</i> (P07, mother, non-bereaved)                                                               | The intervention was something parents understood and said they could support<br>Important to approach for RWPC when parents have the capacity to make an informed decision                |
| Staff Focus group              | 82% (45/55, one missing) indicated 39.5°C was an acceptable permissive temperature threshold.<br>18.2% suggested 40°C was acceptable. Only 20.4% suggested 37.5°C was acceptable as may lead to unnecessary intervention.                                                          | Watching a child be in pain or experience negative side effects: <i>“Incredibly difficult to wait and watch”</i> (P05, Staff, FG5).<br>The trial would be more acceptable if limited to ventilated children. | Mixed views on RWPC, n=25/49, (51%) thought acceptable based on past experience and the emergency situation.<br><br>Concerns about use of RWPC for an intervention that may not be supported by parents. | Understanding that optimal temperature thresholds are unknown<br><br>Want more clinical evidence as it goes against experiential knowledge (e.g. administering antipyretic at 38°C)                | Concerns about the loss of non-antipyretic effects e.g. discomfort relief, reducing risk of seizures/rigors, decreased cardio work load.<br><br>Staff with no experience of RWPC had concerns it would negatively impact on trust and the <i>“working relationship”</i> (P03, Staff, FG1) | Evidence to support the trial: <i>“Well there is, there is a bit of science which suggests we should let the temperature get higher”</i> (P01, Staff, FG3)<br><br>Waiting for the permissive threshold would go against their clinical training or <i>“gut instinct”</i> (P05, Staff, FG2) | No perceived issues with taking a temperature. Query method that is going to be used.<br><br>Nurses stated they may not follow the protocol if a child was upset, combative, in discomfort |

Table 2 Key: shaded fields highlight potentially unacceptable aspects of the trial. Abbreviations: Research Without Prior Consent (RWPC), Focus Group (FG), Randomised Control Trial (RCT), participant information sheets (PIS)

Table 3: Parent concordant acceptability of a FEVER Pilot Trial mapped to Sekhon et al’s acceptability framework (2017)

| Data collection method   | Affective attitude                                               | Burden                           | Ethicality                                                                  | Intervention Coherence                                                                                                   | Opportunity Costs                                                                                                                                                                             | Perceived Effectiveness                                                 | Self-Efficacy                                                                             |                                                             |
|--------------------------|------------------------------------------------------------------|----------------------------------|-----------------------------------------------------------------------------|--------------------------------------------------------------------------------------------------------------------------|-----------------------------------------------------------------------------------------------------------------------------------------------------------------------------------------------|-------------------------------------------------------------------------|-------------------------------------------------------------------------------------------|-------------------------------------------------------------|
| Parents<br>Questionnaire | N= 92/100 (92%) consented to taking part in the Fever Pilot RCT. | Not collected at this Time point | N= 32/41 (79%) reported the belief medical research studies are important   | N= 46/48, (96%) agreed that the information received about the Fever pilot RCT was clear & straightforward to understand | <i>My child is comfortable”</i> (P49, questionnaire, mother, permissive)                                                                                                                      | N= 30/41 (73.2%) selected helping my child as a reason for taking part. | N= 41,(89.4%) felt they made the decision for their child to take part in the pilot trial |                                                             |
|                          |                                                                  |                                  | N= 42/48 (89.4%) satisfied with the RWPC process in the Fever pilot RCT     |                                                                                                                          | Concerns about their child being in pain or discomfort and impact on pre-existing medical condition.                                                                                          |                                                                         |                                                                                           | <i>“So far recovering well”</i><br>P21,mother,non-bereaved) |
|                          |                                                                  |                                  | N= 32/41 (78%) selected helping other children as a reason for taking part. |                                                                                                                          | <i>“My son had too many underlying medical conditions and felt it may hinder his recovery as he was selected to the upper limit before treatment</i> (P73, questionnaire, father, permissive) |                                                                         |                                                                                           |                                                             |

Table 3 Key: shaded fields highlight potentially unacceptable aspects of the trial. *Abbreviations:* Randomised Control Trial (RCT), Research Without Prior Consent (RWPC)

Table 4 Key: shaded fields highlight potentially unacceptable aspects of the trial. *Abbreviations:* Research Without Prior Consent (RWPC), Focus Group (FG), Randomised Control Trial (RCT)

Table 4: Retrospective Acceptability of a FEVER Pilot Trial mapped to Sekhon et al's acceptability framework (2017)

| Group & data collection method(s)     | Affective attitude                                                                                                                                                                                                                                                                                                                                                               | Burden                                                                                                                                                                                                                                                                             | Ethicality                                                                                                                                                                                                                                                                                     | Intervention Coherence                                                                                                                                     | Opportunity Costs                                                                                                                                                             | Perceived Effectiveness                                                                                                                 | Self-Efficacy                                                                                                                                                                                                                                                                        |
|---------------------------------------|----------------------------------------------------------------------------------------------------------------------------------------------------------------------------------------------------------------------------------------------------------------------------------------------------------------------------------------------------------------------------------|------------------------------------------------------------------------------------------------------------------------------------------------------------------------------------------------------------------------------------------------------------------------------------|------------------------------------------------------------------------------------------------------------------------------------------------------------------------------------------------------------------------------------------------------------------------------------------------|------------------------------------------------------------------------------------------------------------------------------------------------------------|-------------------------------------------------------------------------------------------------------------------------------------------------------------------------------|-----------------------------------------------------------------------------------------------------------------------------------------|--------------------------------------------------------------------------------------------------------------------------------------------------------------------------------------------------------------------------------------------------------------------------------------|
| <b>Parents Interviews</b>             | <i>'I think it's a brilliant idea, so I'm all, I'm all for it'</i> (P80, interview mother, permissive). Decliners also approve the trial <i>"They seem to be quick let's give them paracetamol. we've always been like a kind of, a hold off [ . . . ] I think sometimes paracetamol can hide other things going on as well."</i> (P83, interview, mother, permissive, decliner) | Not invasive <i>"I mean if it was more of an invasive study, I might have had to query it a little bit more but I was happy with everything"</i> (Parent 53, interview, father, restrictive).<br><br>When being weaned of venerator some children displayed discomfort / distress. | Not causing harm to their child: <i>"I just thought, There's no harm in letting her into the study"</i> (P78, interview, mother, restrictive).<br><br>Wish to help others <i>"if it's gonna help other people then yeah"</i> (P85, interview, father, restrictive).<br><br>RWPC was acceptable | Involved treatment, which parents were familiar with; that logically made sense; that was <i>"Clearly explained"</i> (P74, interview, mother, permissive), | 37.5°C ,very acceptable as normal practice at home<br><br>39.5°C acceptable if child is not in discomfort<br><br>≥39.5 °C not acceptable if the child is in pain or distress. | Understand how a fever may logically help a child.<br><br>Concerns about negative impact due to child's pre-existing medical conditions | Valued ability to withdraw or decline consent. <i>"I was happy enough for him to undergo the trial but if at any point the nurses thought he could do with the Calpol, or I thought he could, then I wanted the trial to stop it could do."</i> (P49, interview, mother, permissive) |
| <b>Staff Focus group &amp; Survey</b> | 85 % (n=81/95) trial acceptable<br><br>95% (n=95/100, four missing) 37. °C acceptable<br><br>53% (n=42/79) 39.5°C acceptable                                                                                                                                                                                                                                                     | If the child is not conscious or not in pain no burden                                                                                                                                                                                                                             | Parents think the trial is acceptable therefore it is ethical to randomise their children.<br><br>89.4 % (n= 42/48) satisfied with the use of RWPC                                                                                                                                             | If trained by trial team. Then 39.5°C acceptable                                                                                                           | Mixed views, some observed no negative side effects and reported no costs.                                                                                                    | Seeing as believing, <i>"It's a really good, valuable study to see on a larger scale"</i> (P04, Staff, FG5).                            | Valued being involved in trial design. Ability to follow the protocol mixed, n= 52/96 (54%) <i>"technically very easy to follow"</i> (P06, Staff, FG1)                                                                                                                               |

## RESULTS

### Participant characteristics

*Prospective (Pre-pilot RCT):* 25 semi-structured interviews (n=20 mothers, n=5 fathers) with bereaved (n=6) and non-bereaved (n=19) parents (see figure 3). Parents were interviewed a median of 14 months (range 6-38 months) after admission. Interviews took a median of 48 minutes (range 15-105 minutes). The 15-minute interview was concluded part way through by a bereaved father. Fifty-six staff took part in six focus groups across the four sites, lasting a median of 50 minutes (range 31-59 minutes). Staff mainly self-identified as nurses (n=45, 81%), all were involved in the clinical care of children.

[INSERT FIGURE 3: Participant characteristics by time point]

*Concurrent (During-pilot RCT):* Eighty parents of the 100 children randomised to the pilot RCT consented to receive questionnaire, of these, 48 from 47 families completed and returned a questionnaire while their child was admitted to hospital. Of these, 41/48 (85%) provided consent and 6/48 (13%) declined consent (n=1 missing).

*Retrospective (Post-pilot RCT):* Sixty-six parents of the 100 children randomised to the FEVER pilot trial consented to be contacted for an interview. Data saturation [25] was reached after eight interviews with parents of children allocated to the restrictive (lower) temperature threshold and after 11 interviews with parents of children allocated to the permissive (higher) temperature threshold. Parents were interviewed a median of 31 days after randomisation (range 9-70 days). Their children had received treatment for respiratory illness (e.g. bronchiolitis and respiratory syncytial virus) (n=18/19, 94%), cancer (n=1/19, 5%) and septic shock (n=1/19, 5%). Interviews took an average 32 minutes (range 20-50 minutes).

The staff sample included 98 site staff across all four pilot RCT sites. Almost half (48/98, 49 %) completed the questionnaire, with the rest attending a focus group. The majority (n=75, 77%) were nurses, n=45 (60%), were senior-level staff and most (n=79/98, 81%) were involved in the clinical care of children. Focus groups took an average of 53 minutes (range 23-106 minutes).

### Pre-trial, prospective acceptability

All parents interviewed described how they would hypothetically consent for the use of their child's information in the proposed trial. Parents' views on trial acceptability appeared to be influenced by factors including: all other treatments for infection are given (*Opportunity costs*); the non-invasive nature of the intervention (*Burden*); support for RWPC in this context (*Ethicality*); trust in medical

1  
2  
3 staff to act in the best interests of their child; and a belief that the trial question made sense and  
4 therefore likely to achieve its purpose (*Perceived effectiveness*):

5  
6  
7 *“cause fever is meant to be like part of a fighting off, healing process isn’t it? A natural one...*  
8 *I can understand exactly why it would be interesting to see what happens.” (P07, mother,*  
9 *non-bereaved)*

10  
11  
12 Although analysis of pre-RCT data indicated that many of the constructs of acceptability were met  
13 (see Table 2), there were also aspects of burden, opportunity costs, ethicality and intervention  
14 coherence identified as problematic by both parents and staff. As shown in Table 2, staff concerns  
15 outweighed support at this stage.

16  
17  
18 The majority of parents were not worried about the proposed restrictive temperature threshold of  
19 37.5°C. However, staff expressed concerns that this was too low a threshold to administer an  
20 antipyretic (n=43/54, 80%, two missing) and would go against perceived “*normal practice*” (P01,  
21 Staff, FG4). A common concern was that children would be given unnecessary treatments in a clinical  
22 context where “*we try and give the minimum amount of drugs*” (P02, Staff, FG5) (*Affective attitude*).

23  
24  
25 In contrast, many parents voiced concerns about the acceptability of the permissive threshold with  
26 regards to increased risk of “*seizures*” (P03, mother, non-bereaved) and other potential detrimental  
27 side effects (opportunity costs), such as “*organs shutting down*” (P07, mother, non-bereaved),  
28 “*rigor*” (P06, mother, bereaved) or unnecessary discomfort (*Burden*). The majority suggested that  
29 the pilot RCT would be more acceptable if the permissive temperature threshold was slightly lower  
30 (e.g. 39.9°C or 39.5°C). Although parents stated that they would still consent to a trial involving a  
31 threshold of 40°C (*Affective attitude*), as they trusted staff to monitor their child and act in their best  
32 interests:

33  
34  
35 *“I would trust that my child was being monitored, it’s not like they’re waiting for her*  
36 *condition to get worse before they do something, you are having, a nurse by your bedside at*  
37 *all times, I had complete trust.” (P25, mother, non-bereaved)*

38  
39  
40 Staff also described how a permissive threshold of  $\geq 40^{\circ}\text{C}$  was too high and how they would be  
41 concerned about not using paracetamol for analgesia in the less unwell, spontaneously breathing  
42 patients, who may be in pain or discomfort (*Burden*). In addition, staff were concerned about  
43 parental acceptability of the permissive threshold, RWPC (*Ethicality, Opportunity costs*) and the  
44 impact of increased cardiac workload (*Opportunity costs*).

45  
46  
47 Both groups understood the aims of the proposed trial. However, in addition to changes to  
48 temperature thresholds, amendments to the protocol were suggested. Parents identified aspects of  
49  
50  
51  
52  
53  
54  
55  
56  
57  
58  
59  
60

1  
2  
3 the PIS that required clarification, including whether not treating a temperature could cause a  
4 seizure, incorporating an explanation of how all other treatments would still be given. Staff  
5 requested additional information about the scientific evidence underpinning the research question,  
6 as well as clarification on key issues, such as what cooling methods could be used.  
7  
8  
9

### 10 **Response to pre-trial findings**

11  
12 Pre-trial findings were used in conjunction with observation study findings [19] to develop the pilot  
13 RCT protocol and site training. These included: a permissive temperature threshold of  $\geq 39.5^{\circ}\text{C}$ ;  
14 inclusion criteria that required patients to be mechanically ventilated, therefore likely to be on other  
15 analgesia and changes to information materials. For example, staff training and PIS incorporated  
16 evidence to demonstrate how fever does not cause seizures and observation study findings that  
17 showed the restrictive temperature threshold ( $\geq 37.5^{\circ}\text{C}$ ) falls within usual practice. To address staff  
18 concerns about how parents may respond to trial and RWPC discussions, parent perspectives were  
19 communicated in site training, highlighting parental acceptability of RWPC, temperature thresholds,  
20 parents' questions about the study, and suggestions on how to address such questions.  
21  
22  
23  
24  
25  
26  
27  
28

### 29 **Concurrent acceptability**

30  
31 As demonstrated in Table 3, parent questionnaire data showed that the six constructs of  
32 acceptability measured during this time point were met. Parents reported that the study information  
33 '*was clear and straightforward to understand*' (*Intervention coherence*). Ninety two percent of  
34 randomised children received consent for their continued participation in the pilot RCT (Affective  
35 attitude) [19]. Main reasons for providing consent related to the belief that participation might help  
36 their child ( $n=30/41$ , 73%, *Perceived effectiveness*) and help other children in the future ( $n=32/41$ ,  
37 78%, *Ethicality*). Parents also found the study acceptable because "*my child was comfortable*" (P49,  
38 questionnaire, mother, permissive) (*Opportunity costs and Burden*).  
39  
40  
41  
42  
43  
44

45 Of the eight that refused consent to continue, seven (88%) had been allocated to the permissive  
46 (higher) treatment group. Data suggested that parents who declined some element of their child  
47 participation still supported the proposed Fever RCT. Reasons for refusal of consent were linked to  
48 pre-existing medical conditions and the wish to limit any discomfort experienced by their child: "*My*  
49 *son had too many underlying medical conditions and felt it may hinder his recovery as he was*  
50 *selected to the upper limit*" (P73, questionnaire, father, permissive). Suggesting that there were still  
51 some concerns about withholding analgesia (*Opportunity costs*).  
52  
53  
54  
55  
56

57 Staff acceptability was not measured at this point.  
58  
59  
60



### Post-trial, retrospective acceptability

Interviews conducted with parents a median one-month post randomisation supported and provided further insights into questionnaire findings. All seven constructs of acceptability were met (see table 4). Parents were interested in the trial question and felt the proposed trial was important (*Affective attitude, Perceived effectiveness*). Parents described staff as approaching them appropriately, with well-timed, clear, comprehensive study information leading to strong intervention coherence:

*"I understood what they were saying and was happy to sort of go ahead, with the trial. If it wasn't explained to me too well, I probably wouldn't have bothered doing it."* (P77, interview, father, restrictive) (*Intervention coherence*)

Parents of children allocated to the restrictive temperature threshold found the trial very acceptable as giving paracetamol at this temperature was *"something that I would do myself anyway"* (P82, interview, father, restrictive) (*Ethicality*). Parents also viewed the permissive threshold to be acceptable. However, this acceptability was conditional on their child not being in discomfort (*Opportunity costs*):

*"The only thing would be if she wasn't on any other kind of pain relief, but there's other things to manage, her discomfort"*. (P73, interview, father, permissive)

Indeed, two mothers described how they found the trial acceptable and gave full consent, but later chose to withdraw their child from the study when they were being weaned from ventilation and sedation due to concerns about their child being in pain or distress. Parents valued the ability to withdraw or decline consent (*Self-efficacy*). They also described how they trusted staff to act in their child's best interests, including not adhering to the protocol by administering an antipyretic if at any point staff felt that it was needed (*Burden and Opportunity costs*):

*"I know if anything did happen, you's can stop at any time. Stop it if they saw it was getting out of hand and he, and I felt like it, it wasn't helping, that I would stop it....they wouldn't let him go to the stage of him getting poorly"*. (P85, interview, father, restrictive)

Unlike parents' views, which largely remained consistent across study time points, staff perceptions of the acceptability of the lower temperature shifted during the course of the pilot RCT. Witnessing patient's positive reactions to RWPC and trial discussions and an awareness that  $\geq 37.5^{\circ}\text{C}$  was usual practice, resulted in 95% (n=95/100, four missing) of staff rating the restrictive threshold as acceptable or very acceptable: *"Everybody that was in the lower end of it, I found were like happy to take part"* (P01, Staff, FG4).



1  
2  
3 Staff had mixed views about the acceptability of the permissive temperature threshold.  
4  
5 Approximately half (n=42/79, 53%) indicated that the  $\geq 39.5^{\circ}\text{C}$  threshold was acceptable. They valued  
6  
7 how the trial team responded to their pre-trial concerns by changing the inclusion criteria to omit  
8  
9 non-ventilated children (*Self-efficacy*). Some stated that their previous concerns about high  
10  
11 temperatures causing harm or discomfort (*Opportunity costs*) and parents having a negative  
12  
13 response to the trial and RWPC (*Ethicality*) were not observed:

14  
15 *"Some patients are randomised into the higher temperature and people see that they're*  
16  
17 *actually manageable and it doesn't cause them any harm... It's kind of seeing is believing."*

18  
19 (P03, Staff, FG1)

20  
21 Staff who did not find the permissive temperature acceptable were concerned about not giving  
22  
23 paracetamol for pain or discomfort when a child was conscious (*Opportunity costs*). These concerns  
24  
25 meant that some staff administered paracetamol before a child's temperature had reached  $\geq 39.5^{\circ}\text{C}$ :  
26  
27 *"I feel like potentially we're making our patients more uncomfortable."* (P01, Staff, FG2)

28  
29 Interestingly, staff trained by their local unit colleagues were significantly more likely to find the  
30  
31 permissive threshold not acceptable when compared to those trained directly by the pilot trial team  
32  
33 ( $\chi^2(2) = 8.78$ ,  $p = 0.012$ ). Staff trained colleagues also rated site training as being poor (n=11/97,  
34  
35 11%). These staff remained unclear about the scientific rationale for the study and had lower  
36  
37 Intervention coherence.

38  
39 Despite issues with aspects of *Intervention coherence* and *Opportunity costs*, overall staff rated the  
40  
41 fever trial acceptable (n=81/95, 85 %, *Affective attitude*) and practicable to conduct (n=80/95, 84%,  
42  
43 *Self-efficacy*). Findings suggest that their views could be further augmented if the proposed Fever  
44  
45 RCT protocol was revised to also exclude patients receiving non-invasive forms of ventilation (e.g.  
46  
47 high-flow nasal oxygen) or those close to being extubated when sedation is being weaned.

## 48 49 **Trust**

50  
51 During data analysis, we found that the concept of trust between parents and staff was prevalent  
52  
53 within our data and intrinsically linked to trial acceptability. For example, parents found the trial  
54  
55 acceptable because they trusted staff to put the needs of their child before the requirements of the  
56  
57 study. Both groups discussed the trust parents place in medical expertise during a very emotive  
58  
59 situation. Staff also highlighted that maintaining parental trust impacts on their decisions *"I feel like*  
60  
*there's an element of trust there that would be broken from my point of view."* (P01, Staff, FG2,

1  
2  
3 retrospective). The construct of 'Trust' is not reflected within the TFA. We present an adapted TFA in  
4 Figure 4 incorporating Trust.

5  
6  
7 [INSERT FIGURE 4: The adapted Theoretical framework of Acceptability]  
8

## 9 10 **DISCUSSION**

11  
12 Our study highlights the value of conducting pre-trial research with key stakeholders to inform the  
13 design of challenging clinical trials [29]. Research with parents and staff helped establish trial  
14 acceptability, as well as influence and changed perspectives over time. Prospective qualitative  
15 research identified mixed staff views, whilst parents found the trial broadly acceptable. Both the  
16 parental and staff support for RWPC in time critical trials is constant with previous research [24, 30-  
17 34]. Aspects of *Intervention Coherence, Opportunity Costs, Ethicality and Burden* [13] were identified  
18 that threatened trial success. The majority of staff concerns related to not using paracetamol or  
19 active cooling for pain relief, or to prevent febrile seizures [18]. Prospective findings informed  
20 changes to the PIS, staff training package and the addition of mechanical ventilation to inclusion  
21 criteria. Data from the concurrent and retrospective time points showed a positive response to such  
22 changes, particularly amongst staff. Suggestions to further augment views on trial acceptability and  
23 reduce the number of potential protocol deviations and withdrawals were identified. These include  
24 changes to trial inclusion criteria as well as staff training content and delivery [18].  
25  
26

27  
28 Our findings demonstrate Sekhon and Francis' (2017) assertion that the acceptability of healthcare  
29 interventions is not a fixed construct. If we had taken a binary (acceptable/ not acceptable) or  
30 snapshot approach to determining acceptability, then we would not have been able to identify and  
31 address key concerns that threatened trial acceptability and ultimately, trial feasibility. The TFA was  
32 demonstrated to be comprehensive and relevant to our work. However, we found that the concept  
33 of trust between parents and staff was closely linked to trial acceptability and is not reflected in the  
34 framework. The importance of trust is a recurring theme in healthcare and medicine but is  
35 particularly salient in paediatric trials, as the more vulnerable the population, the greater the need  
36 for trust [5, 35]. Drawing on Hall et al's (2001) [35] work into defining trust in medical relationships,  
37 we propose the addition of an eighth construct of 'Trust' to help inform future trial feasibility  
38 research (see Figure 4). Further research is needed to test the adapted model in establishing the  
39 feasibility of other healthcare interventions and settings. This work will help to establish the  
40 appropriateness of trust as additional construct in the TFA.  
41  
42  
43  
44  
45  
46  
47  
48  
49  
50  
51  
52  
53  
54  
55

56  
57 As the pilot trial was conducted in three months, during the busy winter period the concurrent work  
58 only included parents and therefore lacks insight into staff perspectives during pilot trial conduct.  
59  
60

1  
2  
3 This limitation was compensated for by the use of retrospective (1 week-1 month) mixed methods  
4 ensuring a larger sample, through the survey and depth of insights, through focus groups. Insight  
5 was gained into the views of 8 (2 interviews 6 questionnaires) out of 18 parents (44%) who had  
6 declined their child's continued participation in one or more aspect of the pilot RCT. In particular,  
7 the interviews with parents who declined consent and nursing staff who found the protocol  
8 challenging to follow provided valuable information to assist with refining the study process for a  
9 definitive RCT. However, it is unknown whether or not the predominantly positive views of the  
10 declining parents who took part in an interview or questionnaire were shared by other parents who  
11 declined the FEVER pilot RCT.  
12  
13  
14  
15  
16  
17  
18  
19  
20

21 In summary challenges to delivering the proposed trial included staff and parent concerns about the  
22 acceptability of the proposed protocol. Pre-trial research, staff training and experience of pilot trial  
23 conduct augmented views, providing insight into how challenges may be overcome, such as changes  
24 to the inclusion criteria and delivery of site training. We present an adapted TFA to inform the design  
25 of future trial feasibility studies.  
26  
27  
28  
29

### 30 **Acknowledgements**

31 The authors would like to thank all the parents who shared their experiences with us; their  
32 contribution to the research is invaluable. The authors are grateful to all the staff at participating UK  
33 hospitals and charities/ support groups for their help with recruitment and the UK PICS Study Group  
34 (PICS-SG) for their contributions to this study. We would also like to thank Ms Clara Francis (CF) as  
35 co-investigator and patient partner.  
36  
37  
38  
39  
40

### 41 **Funding**

42 This study was funded by the UK National Institute for Health Research Health Technology  
43 Assessment programme (15/44/01) and supported by the National Institute for Health Research  
44 Great Ormond Street Hospital Biomedical Research Centre. The trial sponsor was Great Ormond  
45 Street Hospital NHS Foundation Trust, Joint R&D Office GOSH/ICH, 30 Guilford Street, London WC1N  
46 1EH, United Kingdom (email: Research.Governance@gosh.nhs.uk). The Clinical Trials Unit for the  
47 Fever study was the ICNARC CTU. The views expressed in this publication are those of the authors  
48 and not necessarily of the funder, the sponsor, the NHS, the NIHR, or the UK Department of Health.  
49  
50  
51  
52  
53  
54  
55

### 56 **Ethics approval and consent to participate**

57 Ethical approval for the study was provided by the National Research Ethics Committee (NRES)  
58 (17/LO/1139). Management approvals were obtained from all study sites.  
59  
60

### Data statement

The datasets generated during and/or analysed during the current study are not publicly available as consent was not sought for data sharing.

### Competing interests' statement.

MJP is a member of the NIHR HTA Board. KMR is a member of the NIHR HS & DR Board.

### Author contributions

Dr Elizabeth Deja conducted the mixed methods research, co-analysed the data, drafted the initial manuscript, reviewed and revised the manuscript.

Professor Mark J Peters is the chief investigator of the FEVER study, he conceived, designed and oversaw conduct of the FEVER study and critically reviewed the manuscript.

Mr Imran Khan was the study manager at the ICNARC CTU responsible for day to day FEVER study management and critically reviewed the manuscript.

Mr Paul R Mouncey is the head of research at ICNARC CTU, a co-applicant, involved in the design and coordination of the FEVER study, contributed to and reviewed the manuscript.

Mr Blaise Fenn and Mr Jason Watkins were study co-applicants, patient and parent representatives who contributed to the design and conduct of the FEVER study including mixed methods perspectives elements.

Dr Padmanabhan Ramnarayan co-applicant helped design and conduct the FEVER study.

Dr Rachel Agbeko, Dr Shane M Tibby, Professor Lyvonne N Tume were co-applicants, site principal investigators and critically reviewed the manuscript.

Dr Kentigern Thorburn site principal investigator and critically reviewed the manuscript.

Dr Kathryn M Rowan is the director at ICNARC CTU, study co-applicant involved in designing and overseeing the FEVER study.

Dr Kerry Woolfall was a co-applicant on the FEVER study, designed the mixed methods perspectives elements of the FEVER study, supervised the mixed methods research, co- analysed the data and reviewed and revised the manuscript.

### Licence statement

I, the Submitting Author has the right to grant and does grant on behalf of all authors of the Work (as defined in the below author licence), an exclusive licence and/or a non-exclusive licence for contributions from authors who are: i) UK Crown employees; ii) where BMJ has agreed a CC-BY licence shall apply, and/or iii) in accordance with the terms applicable for US Federal Government officers or employees acting as part of their official duties; on a worldwide, perpetual, irrevocable, royalty-free basis to BMJ Publishing Group Ltd ("BMJ") its licensees and where the relevant Journal is co-owned by BMJ to the co-owners of the Journal, to publish the Work in BMJ Open and any other BMJ products and to exploit all rights, as set out in our licence.

## REFERENCES

1. McDonald AM, Knight RC, Campbell MK, et al. What influences recruitment to randomised controlled trials? A review of trials funded by two UK funding agencies. *Trials*. 2006;7(9).
2. Bower P, Brueton V, Gamble C, et al. Interventions to improve recruitment and retention in clinical trials: a survey and workshop to assess current practice and future priorities. *Trials*. 2014;15(399).
3. Treweek S, Mitchell E, Pitkethly M, et al. Strategies to improve recruitment to randomised controlled trials. *Cochrane Database Syst Re*. 2010.
4. Caldwell P, Murphy S, Butow P, Craig J. Clinical trials in children *The Lancet*. 2004;364(9436):803-11.
5. Greenberg RG, Gamel B, Bloom D, et al. Parents' perceived obstacles to pediatric clinical trial participation: Findings from the clinical trials transformation initiative *Contemporary Clinical Trials Communications*. 2018.
6. Sammons HM, Starkey ES. Ethical issues of clinical trials in children. *Paediatrics and child health* 2011;22(2).
7. Field MJ, Behrman RE. Institute of Medicine (U.S.). Committee on Clinical Research Involving Children., *Ethical Conduct of Clinical Research Involving Children*. Washington, D.C.: National Academies Press; 2004.
8. Naka F, Strober B, Shahriari M. Clinical trials: Kids are not just little people. *Clinics in Dermatology*. 2017;35(6):583-93.
9. Caldwell PHY, Butow PN, Craig JC. Pediatricians' attitudes towards randomized controlled trials involving children. *The Journal of Pediatrics* 2002;141(6).
10. Caldwell P, Butow P, Craig J. Parents' attitudes to randomised controlled trials involving children. *Journal of Pediatrics* 2003;145:555-60.
11. Enpr-EMA. Preparedness of medicines' clinical trials in paediatrics. Amsterdam: European Medicines Agency; 2020.
12. Diepeveen S, Ling T, Suhrcke M, Roland M, Marteau TM. Public acceptability of government intervention to change health-related behaviours: a systematic review and narrative synthesis. *BMC Public health* 2013;13(756).
13. Sekhon M, Cartwright M, Francis JJ. Acceptability of healthcare interventions: an overview of reviews and development of a theoretical framework. *BMC Health Services Research*. 2017;17(88).
14. Brick T, Agbeko RS, Davies P, et al. Too hot to handle: a survey of attitudes towards fever of 462 pediatric intensive care unit staff. *Eur J Pediatr* 2016;176:423-7.
15. NICE. Fever in Under 5s: Assessment and Initial Management. In: guideline N, editor. London: National Institute for Health and Care Excellence; 2019. p. 1-36.
16. Proposal for a Regulation of the European Parliament and of the Council on Clinical trials on medicinal products for human use, and repealing Directive 2001/20/EC., (2013).
17. The Medicines for human use (Clinical trials) and Blood Safety and Quality (Amendment) Regulations., (2008).
18. Peters MJ, Woolfall K, Khan I, et al. Permissive versus restrictive temperature thresholds in critically ill children with fever and infection: a multicentre randomized clinical pilot trial. *Critical Care*. 2019;23(1):69.
19. Peters MJ, Woolfall K, Khan I, et al. Different temperature thresholds for antipyretic intervention in critically ill children with fever due to infection: the FEVER feasibility RCT. *Health Technology Assessment* 2019;23(5):1 - 148.
20. Woolfall K, O'Hara C, Deja E, et al. Parents' prioritised outcomes for trials investigating treatments for paediatric severe infection: a qualitative synthesis. *Arch Dis Child*. 2019;0:1-6.
21. Woolfall K, Frith L, Gamble C, et al. How parents and practitioners experience research without prior consent (deferred consent) for emergency research involving children with life threatening conditions: a mixed method study. *BMJ Open*. 2015;5.

- 1
- 2
- 3
- 4 22. Inwald DP, Canter R, Woolfall K, et al. Restricted fluid bolus volume in early septic shock: results of the Fluids in Shock pilot trial. *Arch Dis Child*. 2018.
- 5
- 6 23. Molyneux S, Njue M, Boga M, et al. The words will pass with the blowing wind': staff and parent views of the deferred consent process, with prior assent, used in an emergency fluids trial in two African hospitals. *PLOS ONE* 2013;8(8).
- 7
- 8
- 9 24. Inwald D, Canter R, Woolfall K, et al. Restricted fluid bolus versus current practice in children with septic shock: the FiSh feasibility study and pilot RCT. *Health Technol Assess*. 2018;22(51).
- 10
- 11 25. Saunder B, Sim J, Kingstone T, et al. Saturation in qualitative research: exploring its conceptualization and operationalization. *Qual Quant*. 2018;52(4).
- 12
- 13 26. Braun V, Clarke V. Using thematic analysis in psychology. *Qualitative research in psychology*. 2006;3(2):77-101.
- 14
- 15 27. Braun V, Clarke V. What can "thematic analysis" offer health and wellbeing researchers? *International journal of qualitative studies on health and well-being*. 2014;9:26152.
- 16
- 17 28. Gale NK, Heath G, Cameron E, Rashid S, Redwood S. Using the framework method for the analysis of qualitative data in multi-disciplinary health research. *BMC Medical Research Methodology*. 2013;13(117).
- 18
- 19 29. O'Cathain A, Thomas KJ, Drabble SJ, Rudolph A, Goode J, Hewison J. Maximising the value of combining qualitative research and randomised controlled trials in health research: the QUALitative Research in Trials (QUART) study--a mixed methods study. *Health Technol Assess*. 2014;18(38):1-197, v-vi.
- 20
- 21 30. Canvin K, Jacoby A. Duty, desire or indifference? A qualitative study of patient decisions about recruitment to an epilepsy treatment trial. *Trials*. 2006;7(32).
- 22
- 23 31. Roper L, Sherratt FC, Young B, et al. Children's views on research without prior consent in emergency situations: a UK qualitative study. *BMJ open* 2018;8.
- 24
- 25 32. Waterfield T, Lyttle MD, Shields M, et al. Parents' and clinicians' views on conducting paediatric diagnostic test accuracy studies without prior informed consent: qualitative insight from the Petechia in Children study (PiC). *Archives of Disease in Childhood*. 2019:317.
- 26
- 27 33. Woolfall K, Frith L, Dawson A, Gamble C, Lyttle MD, Young B. Fifteen-minute consultation: an evidence-based approach to research without prior consent (deferred consent) in neonatal and paediatric critical care trials. *Archives of disease in childhood - Education and amp; practice edition*. 2016;101(1):49-53.
- 28
- 29 34. Brierley J, Larcher V. Emergency research in children: options for ethical recruitment. *Journal of Medical Ethics*. 2011;37(7):429-32.
- 30
- 31 35. Hall MA, Dugan E, Zheng B, Mishra AK. Trust in Physicians and Medical Institutions: What Is It, Can It Be Measured, and Does It Matter? *The Milbank Quarterly*. 2001;79(4).
- 32
- 33
- 34
- 35
- 36
- 37
- 38
- 39
- 40
- 41
- 42
- 43
- 44
- 45
- 46
- 47
- 48
- 49
- 50
- 51
- 52
- 53
- 54
- 55
- 56
- 57
- 58
- 59
- 60

**LEDGENDS**

Figure 1: Sekhon, Cartwright and Francis (2017) Theoretical Framework of Acceptability

Figure 2: Fever Feasibility study design

Figure 3: Participant characteristics by time point

Table 1: Approach to qualitative data analysis

Table 2: Prospective Acceptability of a FEVER Pilot Trial mapped to Sekhon et al's  
acceptability framework (2017)

Table 3: Parent concordant acceptability of a FEVER Pilot Trial mapped to Sekhon et al's  
acceptability framework (2017)

Table 4: Respective Acceptability of a FEVER Pilot Trial mapped to Sekhon et al's  
acceptability framework (2017)

Figure 4: The adapted Theoretical framework of Acceptability





**Stage 1**

Pre trial feasibility research including:

- Interviews with Parents with experience their child being admitted to an intensive care unit with a fever and suspected infection in the preceding 3 years
- Focus groups with clinicians (nurses and doctors) working the 4 PICUs planned to be included in the pilot
- Observational study of UK practice related to fever management\*

**Stage 2**

- Pilot RCT in 4 hospitals comparing a permissive approach (treat as  $\geq 40^{\circ}\text{C}$ ) with a restrictive approach (treat at  $\geq 37.5^{\circ}\text{C}$ ) to fever management in children\*
- Embedded survey to explore parent perspectives at the point of trial recruitment.

**Stage 3**

- Interviews with parents of children randomised to the pilot RCT approximately one month after hospital discharge.
- Survey and focus groups with staff involved in the pilot RCT at the end of trial recruitment.

\*reported separately



1  
2  
3  
4  
5  
6  
7  
8  
9  
10  
11  
12  
13  
14  
15  
16  
17  
18  
19  
20  
21  
22  
23  
24  
25  
26  
27  
28  
29  
30  
31  
32  
33  
34  
35  
36  
37  
38  
39  
40  
41  
42  
43  
44  
45  
46



## COREQ (CONsolidated criteria for REporting Qualitative research) Checklist

A checklist of items that should be included in reports of qualitative research. You must report the page number in your manuscript where you consider each of the items listed in this checklist. If you have not included this information, either revise your manuscript accordingly before submitting or note N/A.

| Topic                                          | Item No. | Guide Questions/Description                                                                                                                              | Reported on Page No. |
|------------------------------------------------|----------|----------------------------------------------------------------------------------------------------------------------------------------------------------|----------------------|
| <b>Domain 1: Research team and reflexivity</b> |          |                                                                                                                                                          |                      |
| <i>Personal characteristics</i>                |          |                                                                                                                                                          |                      |
| Interviewer/facilitator                        | 1        | Which author/s conducted the interview or focus group?                                                                                                   |                      |
| Credentials                                    | 2        | What were the researcher's credentials? E.g. PhD, MD                                                                                                     |                      |
| Occupation                                     | 3        | What was their occupation at the time of the study?                                                                                                      |                      |
| Gender                                         | 4        | Was the researcher male or female?                                                                                                                       |                      |
| Experience and training                        | 5        | What experience or training did the researcher have?                                                                                                     |                      |
| <i>Relationship with participants</i>          |          |                                                                                                                                                          |                      |
| Relationship established                       | 6        | Was a relationship established prior to study commencement?                                                                                              |                      |
| Participant knowledge of the interviewer       | 7        | What did the participants know about the researcher? e.g. personal goals, reasons for doing the research                                                 |                      |
| Interviewer characteristics                    | 8        | What characteristics were reported about the interviewer/facilitator? e.g. Bias, assumptions, reasons and interests in the research topic                |                      |
| <b>Domain 2: Study design</b>                  |          |                                                                                                                                                          |                      |
| <i>Theoretical framework</i>                   |          |                                                                                                                                                          |                      |
| Methodological orientation and Theory          | 9        | What methodological orientation was stated to underpin the study? e.g. grounded theory, discourse analysis, ethnography, phenomenology, content analysis |                      |
| <i>Participant selection</i>                   |          |                                                                                                                                                          |                      |
| Sampling                                       | 10       | How were participants selected? e.g. purposive, convenience, consecutive, snowball                                                                       |                      |
| Method of approach                             | 11       | How were participants approached? e.g. face-to-face, telephone, mail, email                                                                              |                      |
| Sample size                                    | 12       | How many participants were in the study?                                                                                                                 |                      |
| Non-participation                              | 13       | How many people refused to participate or dropped out? Reasons?                                                                                          |                      |
| <i>Setting</i>                                 |          |                                                                                                                                                          |                      |
| Setting of data collection                     | 14       | Where was the data collected? e.g. home, clinic, workplace                                                                                               |                      |
| Presence of non-participants                   | 15       | Was anyone else present besides the participants and researchers?                                                                                        |                      |
| Description of sample                          | 16       | What are the important characteristics of the sample? e.g. demographic data, date                                                                        |                      |
| <i>Data collection</i>                         |          |                                                                                                                                                          |                      |
| Interview guide                                | 17       | Were questions, prompts, guides provided by the authors? Was it pilot tested?                                                                            |                      |
| Repeat interviews                              | 18       | Were repeat interviews carried out? If yes, how many?                                                                                                    |                      |
| Audio/visual recording                         | 19       | Did the research use audio or visual recording to collect the data?                                                                                      |                      |
| Field notes                                    | 20       | Were field notes made during and/or after the interview or focus group?                                                                                  |                      |
| Duration                                       | 21       | What was the duration of the interviews or focus group?                                                                                                  |                      |
| Data saturation                                | 22       | Was data saturation discussed?                                                                                                                           |                      |
| Transcripts returned                           | 23       | Were transcripts returned to participants for comment and/or                                                                                             |                      |

| Topic                                  | Item No. | Guide Questions/Description                                                                                                        | Reported on Page No. |
|----------------------------------------|----------|------------------------------------------------------------------------------------------------------------------------------------|----------------------|
|                                        |          | correction?                                                                                                                        |                      |
| <b>Domain 3: analysis and findings</b> |          |                                                                                                                                    |                      |
| <i>Data analysis</i>                   |          |                                                                                                                                    |                      |
| Number of data coders                  | 24       | How many data coders coded the data?                                                                                               |                      |
| Description of the coding tree         | 25       | Did authors provide a description of the coding tree?                                                                              |                      |
| Derivation of themes                   | 26       | Were themes identified in advance or derived from the data?                                                                        |                      |
| Software                               | 27       | What software, if applicable, was used to manage the data?                                                                         |                      |
| Participant checking                   | 28       | Did participants provide feedback on the findings?                                                                                 |                      |
| <i>Reporting</i>                       |          |                                                                                                                                    |                      |
| Quotations presented                   | 29       | Were participant quotations presented to illustrate the themes/findings?<br>Was each quotation identified? e.g. participant number |                      |
| Data and findings consistent           | 30       | Was there consistency between the data presented and the findings?                                                                 |                      |
| Clarity of major themes                | 31       | Were major themes clearly presented in the findings?                                                                               |                      |
| Clarity of minor themes                | 32       | Is there a description of diverse cases or discussion of minor themes?                                                             |                      |

Developed from: Tong A, Sainsbury P, Craig J. Consolidated criteria for reporting qualitative research (COREQ): a 32-item checklist for interviews and focus groups. *International Journal for Quality in Health Care*. 2007. Volume 19, Number 6: pp. 349 – 357

**Once you have completed this checklist, please save a copy and upload it as part of your submission. DO NOT include this checklist as part of the main manuscript document. It must be uploaded as a separate file.**
